# Supplementary material for: Quantitative Trait Loci (QTL) Associated with Resistance to a Monogenean Parasite (Benedenia seriolae) in Yellowtail (Seriola quinqueradiata) through Genome Wide Analysis
Source: PLoS One. 2013 Jun 4;8(6):e64987. doi: 10.1371/journal.pone.0064987 (PMC3672171; doi:10.1371/journal.pone.0064987)
Supplement: File S1 — Genotype of microsatellite and SNP markers included in family A and B. And the phenotypic information of fish was used as quantitative trait values for genome-wide analysis. (XLS) [file pone.0064987.s006.xls]

## Sheet: family A female map
Family A female genotype		progeny
linkage group	marker name	1	2	3	4	5	6	7	8	9	10	11	12	13	14	15	16	17	18	19	20	21	22	23	24	25	26	27	28	29	30	31	32	33	34	35	36	37	38	39	40	41	42	43	44	45	46	47	48
Squ1F	Sequ0057TUF	A	A	A	H	H	H	H	A	H	A	A	H	A	H	A	A	A	H	H	A	A	A	A	A	H	A	A	A	H	H	H	A	H	H	H	H	A	H	H	H	H	A	H	H	H	A	A	A
Squ1F	Sequ0302TUF	A	A	A	H	H	H	H	A	H	A	A	H	A	H	A	A	A	H	H	A	A	A	A	A	H	A	A	A	H	H	H	A	H	H	H	H	A	H	H	H	H	A	H	H	H	A	A	A
Squ1F	Sequ0437TUF	A	A	A	H	H	H	H	A	H	A	A	H	A	H	A	A	A	H	H	A	A	A	A	A	H	A	A	A	H	H	H	A	H	H	H	H	A	H	H	H	H	A	H	H	H	A	A	A
Squ1F	Sequ0445TUF	A	A	A	H	H	H	H	A	H	A	A	H	A	H	A	A	A	H	H	A	A	A	A	A	H	A	A	A	H	H	H	A	H	H	H	H	A	H	H	H	H	A	H	H	H	A	A	A
Squ1F	Sequ0769TUF	A	A	A	H	H	H	H	A	H	A	A	H	A	H	A	A	A	H	H	A	A	A	A	A	H	A	A	A	H	H	H	A	H	H	H	H	A	H	H	H	H	A	H	H	H	A	A	A
Squ1F	Sequ0839TUF	A	A	A	H	H	H	H	A	H	A	A	H	A	H	A	A	A	H	H	A	A	A	A	A	H	A	A	A	H	H	H	A	H	H	H	H	A	H	H	H	H	A	H	H	H	A	A	A
Squ1F	Sequ1290BAC	A	A	A	H	H	H	H	A	H	A	A	H	A	H	A	A	A	H	H	A	A	A	A	A	H	A	A	A	H	H	H	A	H	H	H	H	A	H	H	H	H	A	H	H	H	A	A	A
Squ1F	Sequ03558SNP	A	A	A	H	H	H	H	A	H	A	A	H	A	H	A	A	A	H	H	A	A	A	A	A	H	A	A	A	H	H	H	A	H	H	H	H	A	H	H	H	H	A	H	H	H	A	A	A
Squ1F	Sequ0458BAC	A	A	A	H	H	H	H	A	A	A	A	H	A	H	A	A	A	H	H	A	A	A	A	A	H	A	A	A	H	H	H	A	H	H	H	H	A	H	H	H	H	A	H	H	H	A	A	A
Squ1F	Sequ0045TUF	A	A	A	H	H	H	H	A	A	A	A	H	A	H	A	A	A	H	H	A	A	A	A	A	H	A	A	A	A	H	H	A	H	H	H	H	A	H	H	H	H	A	H	H	H	A	A	A
Squ1F	Sequ0118TUF	A	A	A	H	H	H	H	A	A	A	A	H	A	H	A	A	A	H	H	A	A	A	A	A	H	A	A	A	A	H	H	A	H	H	H	H	A	H	H	H	H	A	H	H	H	A	A	A
Squ1F	Sequ0419TUF	A	A	A	H	H	H	H	A	A	A	A	H	A	H	A	A	A	H	H	A	A	A	A	A	H	A	A	A	A	H	H	A	H	H	H	H	A	H	H	H	H	A	H	H	H	A	A	A
Squ1F	Sequ0797TUF	A	A	A	H	H	H	H	A	A	A	A	H	A	H	A	A	A	H	H	A	A	A	A	A	H	A	A	A	A	H	H	A	H	H	H	H	A	H	H	H	H	A	H	H	H	A	A	A
Squ1F	Sequ0821TUF	A	A	A	H	H	H	H	A	A	A	A	H	A	H	A	A	A	H	H	A	A	A	A	A	H	A	A	A	A	H	H	A	H	H	H	H	A	H	H	H	H	A	H	H	H	A	A	A
Squ1F	Sequ0844TUF	A	A	A	H	H	H	H	A	A	A	A	H	A	H	A	A	A	H	H	A	A	A	A	A	H	A	A	A	A	H	H	A	H	H	H	H	A	H	H	H	H	A	H	H	H	A	A	A
Squ1F	Sequ0975TUF	A	A	A	H	H	H	H	A	A	A	A	H	A	H	A	A	A	H	H	A	A	A	A	A	H	A	A	A	A	H	H	A	H	H	H	H	A	H	H	H	H	A	H	H	H	A	A	A
Squ1F	Sequ1032TUF	A	A	A	H	H	H	H	A	A	A	A	H	A	H	A	A	A	H	H	A	A	A	A	A	H	A	A	A	A	H	H	A	H	H	H	H	A	H	H	H	H	A	H	H	H	A	A	A
Squ1F	Sequ1261BAC	A	A	A	H	H	H	H	A	A	A	A	H	A	H	A	A	A	H	H	A	A	A	A	A	H	A	A	A	A	H	H	A	H	H	H	H	A	H	H	H	H	A	H	H	H	A	A	A
Squ1F	Sequ2113BAC	A	A	A	H	H	H	H	A	A	A	A	H	A	H	A	A	A	H	H	A	A	A	A	A	H	A	A	A	A	H	H	A	H	H	H	H	A	H	H	H	H	A	H	H	H	A	A	A
Squ1F	Sequ2793BAC	A	A	A	H	H	H	H	A	A	A	A	H	A	H	A	A	A	H	H	A	A	A	A	A	H	A	A	A	A	H	H	A	H	H	H	H	A	H	H	H	H	A	H	H	H	A	A	A
Squ1F	Sequ3013BAC	A	A	A	H	H	H	H	A	A	A	A	H	A	H	A	A	A	H	H	A	A	A	A	A	H	A	A	A	A	H	H	A	H	H	H	H	A	H	H	H	H	A	H	H	H	A	A	A
Squ1F	Sequ3293BAC	A	A	A	H	H	H	H	A	A	A	A	H	A	H	A	A	A	H	H	A	A	A	A	A	H	A	A	A	A	H	H	A	H	H	H	H	A	H	H	H	H	A	H	H	H	A	A	A
Squ1F	Sequ00455SNP	A	A	A	H	H	H	H	A	A	A	A	H	A	H	A	A	A	H	H	A	A	A	A	A	H	A	A	A	A	H	H	A	H	H	H	H	A	H	H	H	H	A	H	H	H	A	A	A
Squ1F	Sequ02007SNP	A	A	A	H	H	H	H	A	A	A	A	H	A	H	A	A	A	H	H	A	A	A	A	A	H	A	A	A	A	H	H	A	H	H	H	H	A	H	H	H	H	A	H	H	H	A	A	A
Squ1F	Sequ0741TUF	A	A	A	H	H	H	H	A	A	A	A	H	A	H	A	A	A	H	H	A	A	A	A	H	H	A	A	A	A	H	A	A	H	H	H	H	A	H	H	H	H	A	H	H	H	A	A	A
Squ1F	Sequ0742TUF	A	A	A	H	H	H	H	A	A	A	A	H	A	H	A	A	A	H	H	A	A	A	A	H	H	A	A	A	A	H	A	A	H	H	H	H	A	H	H	H	H	A	H	H	H	A	A	A
Squ1F	Sequ0883BAC	A	A	A	H	H	H	H	A	A	A	A	H	A	H	A	A	A	H	H	A	A	A	A	H	H	A	A	A	A	H	A	A	H	H	H	H	A	H	H	H	H	A	H	H	H	A	A	A
Squ1F	Sequ0526BAC	A	A	A	H	H	H	H	A	A	A	A	H	A	H	A	A	A	H	H	A	A	A	A	H	H	A	A	A	A	A	A	A	H	H	H	H	A	H	H	H	H	A	A	A	H	A	A	A
Squ1F	Sequ02185SNP	A	A	A	H	H	H	H	A	A	A	A	H	A	H	A	A	A	H	H	A	A	A	A	H	H	A	H	A	A	A	A	A	H	H	H	H	A	H	H	H	H	A	A	A	H	A	A	A
Squ1F	Sequ1214BAC	A	A	H	H	H	H	H	A	A	A	A	H	A	H	H	H	A	H	H	A	H	A	A	H	H	A	H	H	H	A	A	A	H	H	H	H	A	H	A	H	H	A	A	A	H	A	A	A
Squ1F	Sequ0598TUF	A	A	H	H	H	H	H	A	A	A	A	H	A	H	H	H	A	H	H	A	H	A	A	H	H	A	H	H	H	A	A	H	H	A	H	H	A	H	A	H	H	A	A	A	H	A	A	A
Squ1F	Sequ0453TUF	H	H	H	H	H	H	H	A	A	A	A	H	A	H	H	H	H	H	H	A	H	A	A	H	H	A	H	H	H	A	A	H	H	A	H	H	A	H	A	H	H	A	A	A	H	A	A	A
Squ1F	Sequ0798TUF	H	H	H	H	H	H	H	A	A	A	A	H	A	H	H	H	H	H	H	A	H	A	A	H	H	A	H	H	H	A	A	H	H	A	H	H	A	H	A	H	H	A	A	A	H	A	A	A
Squ1F	Sequ1845BAC	H	H	H	H	H	H	H	A	A	A	A	H	A	H	H	H	H	H	H	A	H	A	A	H	A	A	H	H	H	A	A	H	A	A	H	H	A	H	A	H	H	A	A	A	H	A	A	A
Squ1F	Sequ0893TUF	H	H	H	H	H	A	H	A	A	A	A	H	A	H	H	H	H	H	H	A	H	A	A	H	A	A	H	H	H	A	A	H	A	A	H	H	A	H	A	H	H	A	A	A	H	A	A	A
Squ1F	Sequ0990TUF	H	H	H	H	H	A	H	A	A	A	A	H	A	H	H	H	H	H	H	A	H	A	A	H	A	A	H	H	H	A	A	H	A	A	H	H	A	H	A	H	H	A	A	A	H	A	A	A
Squ2F	Sequ0202TUF	H	H	H	A	A	A	H	H	A	A	H	A	H	A	A	A	H	A	A	H	A	H	A	H	H	H	A	A	A	A	H	H	A	A	A	A	H	A	H	A	A	H	H	A	H	A	A	H
Squ2F	Sequ0232TUF	H	H	H	A	A	A	H	H	A	A	H	A	H	A	A	A	H	A	A	H	A	H	A	H	H	H	A	A	A	A	H	H	A	A	A	A	H	A	H	A	A	H	H	A	H	A	A	H
Squ2F	Sequ0254TUF	H	H	H	A	A	A	H	H	A	A	H	A	H	A	A	A	H	A	A	H	A	H	A	H	H	H	A	A	A	A	H	H	A	A	A	A	H	A	H	A	A	H	H	A	H	A	A	H
Squ2F	Sequ0552TUF	H	H	H	A	A	A	H	H	A	A	H	A	H	A	A	A	H	A	A	H	A	H	A	H	H	H	A	A	A	A	H	H	A	A	A	A	H	A	H	A	A	H	H	A	H	A	A	H
Squ2F	Sequ0575TUF	H	H	H	A	A	A	H	H	A	A	H	A	H	A	A	A	H	A	A	H	A	H	A	H	H	H	A	A	A	A	H	H	A	A	A	A	H	A	H	A	A	H	H	A	H	A	A	H
Squ2F	Sequ0046BAC	H	H	H	A	A	A	H	H	A	A	H	A	H	A	A	A	H	A	A	H	A	H	A	H	H	H	A	A	A	A	H	H	A	A	A	A	H	A	H	A	A	H	H	A	H	A	A	H
Squ2F	Sequ0356BAC	H	H	H	A	A	A	H	H	A	A	H	A	H	A	A	A	H	A	A	H	A	H	A	H	H	H	A	A	A	A	H	H	A	A	A	A	H	A	H	A	A	H	H	A	H	A	A	H
Squ2F	Sequ1334BAC	H	H	H	A	A	A	H	H	A	A	H	A	H	A	A	A	H	A	A	H	A	H	A	H	H	H	A	A	A	A	H	H	A	A	A	A	H	A	H	A	A	H	H	A	H	A	A	H
Squ2F	Sequ1771BAC	H	H	H	A	A	A	H	H	A	A	H	A	H	A	A	A	H	A	A	H	A	H	A	H	H	H	A	A	A	A	H	H	A	A	A	A	H	A	H	A	A	H	H	A	H	A	A	H
Squ2F	Sequ1797BAC	H	H	H	A	A	A	H	H	A	A	H	A	H	A	A	A	H	A	A	H	A	H	A	H	H	H	A	A	A	A	H	H	A	A	A	A	H	A	H	A	A	H	H	A	H	A	A	H
Squ2F	Sequ2698BAC	H	H	H	A	A	A	H	H	A	A	H	A	H	A	A	A	H	A	A	H	A	H	A	H	H	H	A	A	A	A	H	H	A	A	A	A	H	A	H	A	A	H	H	A	H	A	A	H
Squ2F	Sequ0688BAC	H	H	H	A	A	A	H	H	A	A	H	A	H	A	A	A	H	A	A	H	A	H	A	H	H	H	A	A	A	A	H	H	A	A	A	A	H	A	H	A	A	H	H	A	H	A	A	H
Squ2F	Sequ1665BAC	H	H	H	A	A	A	H	H	A	A	H	A	H	A	A	A	H	A	A	H	A	H	A	H	H	H	A	A	A	A	H	H	A	A	A	A	H	A	H	A	A	H	H	A	H	A	A	H
Squ2F	Sequ2080BAC	H	H	H	A	A	A	H	H	A	A	H	A	H	A	A	A	H	A	A	H	A	H	A	H	H	H	A	A	A	A	H	H	A	A	A	A	H	A	H	A	A	H	H	A	H	A	A	H
Squ2F	Sequ02738SNP	H	-	H	-	-	A	H	H	A	A	H	A	H	A	A	A	H	A	A	H	A	H	A	H	H	H	A	A	A	A	H	H	A	A	A	A	H	A	H	A	A	H	H	A	H	A	A	H
Squ2F	Sequ0020TUF	H	H	H	A	A	A	H	H	A	H	H	A	H	A	A	A	H	A	A	H	A	H	A	H	H	H	A	A	A	A	H	H	A	A	A	A	H	A	H	A	A	H	H	A	H	A	A	H
Squ2F	Sequ0843TUF	H	H	H	A	A	A	H	H	A	H	H	A	H	A	A	A	H	A	A	H	A	H	A	H	H	H	A	A	A	A	H	H	A	A	A	A	H	A	H	A	A	H	H	A	H	A	A	H
Squ2F	Sequ0889TUF	H	H	H	A	A	A	H	H	A	H	H	A	H	A	A	A	H	A	A	H	A	H	A	H	H	H	A	A	A	A	H	H	A	A	A	A	H	A	H	A	A	H	H	A	H	A	A	H
Squ2F	Sequ0941TUF	H	H	H	A	A	A	H	H	A	H	H	A	H	A	A	A	H	A	A	H	A	H	A	H	H	H	A	A	A	A	H	H	A	A	A	A	H	A	H	A	A	H	H	A	H	A	A	H
Squ2F	Sequ2216BAC	H	H	H	A	A	A	H	H	A	H	H	A	H	A	A	A	H	A	A	H	A	H	A	H	H	H	A	A	A	A	H	H	A	A	A	A	H	A	H	A	A	H	H	A	H	A	A	H
Squ2F	Sequ03866SNP	H	H	H	A	A	A	H	H	A	H	H	A	H	A	A	A	H	A	A	H	A	H	A	H	H	H	A	A	A	A	H	H	A	A	A	A	H	A	H	A	A	H	H	A	H	A	A	H
Squ2F	Sequ0198TUF	H	H	H	A	A	A	H	H	A	H	H	A	H	A	A	A	H	A	A	H	A	H	A	H	H	H	A	A	A	A	H	H	A	A	A	A	H	A	H	A	A	H	H	A	H	A	A	H
Squ2F	Sequ0225TUF	H	H	H	A	A	A	H	H	A	H	H	A	H	A	A	A	H	A	A	H	A	H	A	H	H	H	A	A	A	A	H	H	A	A	A	A	H	A	H	A	A	H	H	A	H	A	A	H
Squ2F	Sequ0247TUF	H	H	H	A	A	A	H	H	A	H	H	A	H	A	A	A	H	A	A	H	A	H	A	H	H	H	A	A	A	A	H	H	A	A	A	A	H	A	H	A	A	H	H	A	H	A	A	H
Squ2F	Sequ0534TUF	H	H	H	A	A	A	H	H	A	H	H	A	H	A	A	A	H	A	A	H	A	H	A	H	H	H	A	A	A	A	H	H	A	A	A	A	H	A	H	A	A	H	H	A	H	A	A	H
Squ2F	Sequ0546TUF	H	H	H	A	A	A	H	H	A	H	H	A	H	A	A	A	H	A	A	H	A	H	A	H	H	H	A	A	A	A	H	H	A	A	A	A	H	A	H	A	A	H	H	A	H	A	A	H
Squ2F	Sequ0603TUF	H	H	H	A	A	A	H	H	A	H	H	A	H	A	A	A	H	A	A	H	A	H	A	H	H	H	A	A	A	A	H	H	A	A	A	A	H	A	H	A	A	H	H	A	H	A	A	H
Squ2F	Sequ0648TUF	H	H	H	A	A	A	H	H	A	H	H	A	H	A	A	A	H	A	A	H	A	H	A	H	H	H	A	A	A	A	H	H	A	A	A	A	H	A	H	A	A	H	H	A	H	A	A	H
Squ2F	Sequ0767TUF	H	H	H	A	A	A	H	H	A	H	H	A	H	A	A	A	H	A	A	H	A	H	A	H	H	H	A	A	A	A	H	H	A	A	A	A	H	A	H	A	A	H	H	A	H	A	A	H
Squ2F	Sequ0785TUF	H	H	H	A	A	A	H	H	A	H	H	A	H	A	A	A	H	A	A	H	A	H	A	H	H	H	A	A	A	A	H	H	A	A	A	A	H	A	H	A	A	H	H	A	H	A	A	H
Squ2F	Sequ0832TUF	H	H	H	A	A	A	H	H	A	H	H	A	H	A	A	A	H	A	A	H	A	H	A	H	H	H	A	A	A	A	H	H	A	A	A	A	H	A	H	A	A	H	H	A	H	A	A	H
Squ2F	Sequ0880TUF	H	H	H	A	A	A	H	H	A	H	H	A	H	A	A	A	H	A	A	H	A	H	A	H	H	H	A	A	A	A	H	H	A	A	A	A	H	A	H	A	A	H	H	A	H	A	A	H
Squ2F	Sequ0881TUF	H	H	H	A	A	A	H	H	A	H	H	A	H	A	A	A	H	A	A	H	A	H	A	H	H	H	A	A	A	A	H	H	A	A	A	A	H	A	H	A	A	H	H	A	H	A	A	H
Squ2F	Sequ1004TUF	H	H	H	A	A	A	H	H	A	H	H	A	H	A	A	A	H	A	A	H	A	H	A	H	H	H	A	A	A	A	H	H	A	A	A	A	H	A	H	A	A	H	H	A	H	A	A	H
Squ2F	Sequ0746BAC	H	H	H	A	A	A	H	H	A	H	H	A	H	A	A	A	H	A	A	H	A	H	A	H	H	H	A	A	A	A	H	H	A	A	A	A	H	A	H	A	A	H	H	A	H	A	A	H
Squ2F	Sequ1547BAC	H	H	H	A	A	A	H	H	A	H	H	A	H	A	A	A	H	A	A	H	A	H	A	H	H	H	A	A	A	A	H	H	A	A	A	A	H	A	H	A	A	H	H	A	H	A	A	H
Squ2F	Sequ1837BAC	H	H	H	A	A	A	H	H	A	H	H	A	H	A	A	A	H	A	A	H	A	H	A	H	H	H	A	A	A	A	H	H	A	A	A	A	H	A	H	A	A	H	H	A	H	A	A	H
Squ2F	Sequ3121BAC	H	H	H	A	A	A	H	H	A	H	H	A	H	A	A	A	H	A	A	H	A	H	A	H	H	H	A	A	A	A	H	H	A	A	A	A	H	A	H	A	A	H	H	A	H	A	A	H
Squ2F	Sequ3189BAC	H	H	H	A	A	A	H	H	A	H	H	A	H	A	A	A	H	A	A	H	A	H	A	H	H	H	A	A	A	A	H	H	A	A	A	A	H	A	H	A	A	H	H	A	H	A	A	H
Squ2F	Sequ02443SNP	H	H	H	A	A	A	H	H	A	H	H	A	H	A	A	A	H	A	A	H	A	H	A	H	H	H	A	A	A	A	H	H	A	A	A	A	H	A	H	A	A	H	H	A	H	A	A	H
Squ2F	Sequ0174TUF	H	H	H	A	A	A	H	H	A	H	H	A	H	A	A	A	H	A	A	H	A	H	A	A	H	H	A	A	A	A	A	H	A	A	A	A	H	A	H	A	A	H	H	A	A	A	A	H
Squ2F	Sequ0171BAC	H	A	H	A	A	A	A	H	A	H	A	A	H	A	A	A	H	A	A	H	A	A	A	A	H	H	A	A	A	A	A	A	A	A	A	A	H	A	H	A	A	H	H	A	A	A	A	H
Squ2F	Sequ0172TUF	H	A	H	A	A	A	A	H	A	H	A	A	H	A	A	A	H	A	A	H	A	A	A	A	H	A	H	A	A	A	A	A	A	A	H	A	H	A	H	A	A	H	H	A	A	A	A	H
Squ2F	Sequ0672TUF	A	A	H	A	A	A	A	A	A	H	A	A	H	A	A	A	H	A	A	H	A	A	A	A	H	A	H	A	A	A	A	A	A	A	H	A	H	A	H	A	A	H	H	A	A	A	A	H
Squ2F	Sequ0125TUF	A	A	H	A	A	A	A	A	A	H	A	A	A	A	A	A	H	A	A	A	A	A	A	A	H	A	H	A	A	A	A	A	A	A	H	A	H	A	H	A	A	H	H	A	A	A	A	H
Squ2F	Sequ1065TUF	A	A	H	A	A	A	A	A	A	H	A	A	A	A	A	A	H	A	A	A	A	A	A	A	H	A	H	A	A	A	A	A	A	A	H	A	H	A	H	A	A	H	H	A	A	A	A	H
Squ2F	Sequ1295BAC	A	A	H	A	A	A	A	A	A	H	A	A	A	A	A	A	A	A	A	A	A	A	A	A	H	A	H	A	A	A	A	A	A	A	H	A	H	A	H	A	A	H	H	A	A	A	A	H
Squ2F	Sequ1066TUF	A	A	H	A	A	A	A	A	A	H	A	A	A	A	A	A	A	A	A	A	A	A	A	A	H	A	H	A	A	A	A	A	A	H	H	A	H	A	H	A	A	H	A	A	A	A	A	H
Squ2F	Sequ0979BAC	A	A	H	A	A	A	A	A	A	H	A	A	A	A	A	A	A	A	A	A	A	A	A	A	H	A	H	A	A	A	A	A	A	H	H	A	H	A	H	A	A	H	A	A	A	A	A	H
Squ2F	Sequ1067TUF	A	A	H	A	A	A	A	A	A	H	A	A	A	A	A	A	A	A	A	A	A	A	A	A	H	A	H	A	A	A	A	A	A	H	H	A	H	A	H	A	A	H	A	A	A	A	A	H
Squ2F	Sequ1068TUF	A	A	H	A	H	A	A	A	A	H	A	A	A	A	A	H	A	H	A	A	A	A	A	A	H	A	H	A	A	A	A	A	H	H	H	A	H	A	H	A	A	H	A	A	A	A	A	H
Squ2F	Sequ1069TUF	A	A	H	A	H	A	A	A	A	H	A	A	A	A	A	H	A	H	A	A	A	A	A	A	H	A	H	A	A	A	A	A	H	H	H	A	H	A	H	A	A	H	A	A	A	A	A	H
Squ2F	Sequ1070TUF	A	A	H	H	H	A	A	A	A	H	A	A	A	A	A	H	A	H	A	A	A	A	A	A	H	A	H	A	A	A	A	A	H	H	H	A	H	A	H	A	A	H	A	A	A	A	A	H
Squ2F	Sequ0788TUF	A	A	H	H	H	A	A	A	A	H	A	A	A	A	A	H	A	H	A	A	A	A	A	A	H	A	H	A	A	A	A	A	H	H	H	A	H	A	H	A	A	H	A	A	A	A	A	H
Squ2F	Sequ0549TUF	A	A	H	H	H	A	A	A	A	H	A	A	A	A	A	H	A	H	A	A	A	A	A	A	H	A	H	A	A	A	A	A	H	H	H	H	H	A	H	A	A	H	A	A	A	A	A	H
Squ2F	Sequ1026TUF	A	A	H	H	H	A	A	A	A	H	A	A	A	A	A	H	A	H	A	A	A	A	A	A	H	A	H	A	A	A	A	A	H	H	H	H	H	A	H	A	A	H	A	A	A	A	A	H
Squ2F	Sequ1749BAC	A	A	H	H	H	A	A	A	A	H	A	A	A	A	A	H	A	H	A	A	A	A	A	A	H	A	H	A	A	A	A	A	H	H	H	H	H	A	H	A	A	H	A	A	A	A	A	H
Squ2F	Sequ0827TUF	A	A	H	H	H	A	A	A	A	H	A	A	A	A	A	H	A	H	A	A	A	A	A	A	H	A	H	A	A	A	A	A	H	H	H	H	H	A	H	A	A	H	A	A	A	A	A	H
Squ2F	Sequ0828TUF	A	A	H	H	H	A	A	A	A	H	A	A	A	A	A	H	A	H	A	A	A	A	A	A	H	A	H	A	A	A	A	A	H	H	H	H	H	A	H	A	A	H	A	A	A	A	A	H
Squ3F	Sequ0403TUF	H	A	A	H	H	A	A	H	A	H	A	A	H	H	H	A	H	A	H	A	A	A	A	A	A	H	A	H	A	H	H	A	A	A	H	H	H	H	H	A	A	A	A	A	A	H	A	A
Squ3F	Sequ1086BAC	H	A	A	H	H	A	A	H	A	H	A	A	H	H	H	A	H	A	H	A	A	A	A	A	A	H	A	H	A	H	H	A	A	A	H	H	H	H	H	A	A	A	A	A	A	H	A	A
Squ3F	Sequ2028BAC	H	A	A	H	H	A	A	H	A	H	A	A	H	H	H	A	H	A	H	A	A	A	A	A	A	H	A	H	A	H	H	A	A	A	H	H	H	H	H	A	A	A	A	A	A	H	A	A
Squ3F	Sequ2783BAC	H	A	A	H	H	A	A	H	A	H	A	A	H	H	H	A	H	A	H	A	A	A	A	A	A	H	A	H	A	H	H	A	A	A	H	H	H	H	H	A	A	A	A	A	A	H	A	A
Squ3F	Sequ0858TUF	H	A	A	H	H	A	A	H	A	H	A	A	H	H	H	A	H	A	H	A	A	A	A	A	A	H	A	H	A	H	H	A	A	A	H	H	A	H	H	A	A	A	A	A	A	H	A	A
Squ3F	Sequ0047BAC	H	A	A	H	H	A	A	H	A	H	H	A	H	H	H	A	H	A	H	A	A	A	A	A	A	H	A	H	A	H	H	A	A	A	H	H	A	H	H	A	A	A	A	A	A	H	A	A
Squ3F	Sequ0557TUF	H	A	A	H	H	A	A	H	A	H	H	A	H	H	H	A	H	A	H	A	A	A	A	A	A	H	A	H	A	H	H	A	A	A	H	H	A	H	H	A	A	A	A	A	A	H	A	A
Squ3F	Sequ0956TUF	H	A	A	H	H	A	A	H	A	H	H	A	H	H	H	A	H	A	H	A	A	A	A	A	A	H	A	H	A	H	H	A	A	A	H	H	A	H	H	A	A	A	A	A	A	H	A	A
Squ3F	Sequ0419BAC	H	A	A	H	H	A	A	H	A	H	H	A	H	H	H	A	H	A	H	A	A	A	A	A	A	H	A	H	A	H	H	A	A	A	H	H	A	H	H	A	A	A	A	A	A	H	A	A
Squ3F	Sequ1666BAC	H	A	A	H	H	A	A	H	A	H	H	A	H	H	H	A	H	A	H	A	A	A	A	A	A	H	A	H	A	H	H	A	A	A	H	H	A	H	H	A	A	A	A	A	A	H	A	A
Squ3F	Sequ0019TUF	H	A	A	H	H	A	A	H	A	H	H	A	H	H	H	A	H	A	H	A	A	A	A	A	A	H	A	H	A	H	H	A	A	A	H	H	A	H	H	A	A	A	A	A	A	H	A	A
Squ3F	Sequ0040TUF	H	A	A	H	H	A	A	H	A	H	H	A	H	H	H	A	H	A	H	A	A	A	A	A	A	H	A	H	A	H	H	A	A	A	H	H	A	H	H	A	A	A	A	A	A	H	A	A
Squ3F	Sequ0079TUF	H	A	A	H	H	A	A	H	A	H	H	A	H	H	H	A	H	A	H	A	A	A	A	A	A	H	A	H	A	H	H	A	A	A	H	H	A	H	H	A	A	A	A	A	A	H	A	A
Squ3F	Sequ0110TUF	H	A	A	H	H	A	A	H	A	H	H	A	H	H	H	A	H	A	H	A	A	A	A	A	A	H	A	H	A	H	H	A	A	A	H	H	A	H	H	A	A	A	A	A	A	H	A	A
Squ3F	Sequ1859BAC	H	A	A	H	H	A	A	H	A	H	H	A	H	H	H	A	H	A	H	A	A	A	A	A	A	H	A	H	A	H	H	A	A	A	H	H	A	H	H	A	A	A	A	A	A	H	A	A
Squ3F	Sequ1981BAC	H	A	A	H	H	A	A	H	A	H	H	A	H	H	H	A	H	A	H	A	A	A	A	A	A	H	A	H	A	H	H	A	A	A	H	H	A	H	H	A	A	A	A	A	A	H	A	A
Squ3F	Sequ2986BAC	H	A	A	H	H	A	A	H	A	H	H	A	H	H	H	A	H	A	H	A	A	A	A	A	A	H	A	H	A	H	H	A	A	A	H	H	A	H	H	A	A	A	A	A	A	H	A	A
Squ3F	Sequ0208TUF	H	A	A	H	H	A	A	H	A	H	H	A	H	H	H	A	H	A	H	A	A	A	A	A	A	H	A	H	A	H	H	A	A	A	H	H	A	H	H	A	A	A	A	A	A	H	A	A
Squ3F	Sequ0740TUF	H	A	A	H	H	A	A	H	A	H	H	A	H	H	H	A	H	A	H	A	A	A	A	A	A	H	A	H	A	H	H	A	A	A	H	H	A	H	H	A	A	A	A	A	A	H	A	A
Squ3F	Sequ0887TUF	H	A	A	H	H	A	A	H	A	H	H	A	H	H	H	A	H	A	H	A	A	A	A	A	A	H	A	H	A	H	H	A	A	A	H	H	A	H	H	A	A	A	A	A	A	H	A	A
Squ3F	Sequ1034TUF	H	A	A	H	H	A	A	H	A	H	H	A	H	H	H	A	H	A	H	A	A	A	A	A	A	H	A	H	A	H	H	A	A	A	H	H	A	H	H	A	A	A	A	A	A	H	A	A
Squ3F	Sequ0353BAC	H	A	A	H	H	A	A	H	A	H	H	A	H	H	H	A	H	A	H	A	A	A	A	A	A	H	A	H	A	H	H	A	A	A	H	H	A	H	H	A	A	A	A	A	A	H	A	A
Squ3F	Sequ2058BAC	H	A	A	H	H	A	A	H	A	H	H	A	H	H	H	A	H	A	H	A	A	A	A	A	A	H	A	H	A	H	H	A	A	A	H	H	A	H	H	A	A	A	A	A	A	H	A	A
Squ3F	Sequ0103TUF	H	A	A	H	H	A	A	H	A	H	H	A	H	H	H	A	H	A	H	A	A	A	A	A	A	H	A	H	A	H	H	A	A	A	H	H	A	H	H	A	A	A	A	A	A	H	A	A
Squ3F	Sequ1081BAC	H	A	A	H	H	A	A	H	A	H	H	A	H	H	H	A	H	A	H	A	A	A	A	A	A	H	A	H	A	H	H	A	A	A	H	H	A	H	H	A	A	A	A	A	A	H	A	A
Squ3F	Sequ3062BAC	H	A	A	H	H	A	A	H	A	H	H	A	H	H	H	A	H	A	H	A	A	A	A	A	A	H	A	H	A	H	H	A	A	A	H	H	A	H	H	A	A	A	A	A	A	H	A	A
Squ3F	Sequ0233TUF	H	A	A	H	H	H	A	H	A	H	H	A	H	H	H	A	H	A	H	A	A	H	A	A	A	A	H	H	A	H	H	A	A	A	H	H	A	H	H	A	A	A	A	A	A	H	A	A
Squ3F	Sequ0619TUF	A	A	A	H	H	H	A	H	H	A	H	A	H	H	H	A	H	A	H	A	A	H	A	A	A	A	H	A	A	H	H	H	A	H	H	H	H	H	H	A	A	A	A	H	H	A	A	A
Squ3F	Sequ0878TUF	A	A	A	H	H	H	A	H	H	A	H	A	H	H	H	A	H	A	H	A	A	H	A	A	A	A	H	A	A	H	H	H	A	H	H	H	H	H	H	A	A	A	A	H	H	A	A	A
Squ4F	Sequ1217BAC	H	H	H	H	H	A	H	H	H	H	A	A	A	A	A	H	A	A	H	A	H	H	A	H	H	A	A	H	A	H	A	A	A	H	A	H	A	A	H	A	A	H	A	H	A	H	A	A
Squ4F	Sequ0902TUF	H	H	H	H	H	H	H	H	H	H	A	A	A	A	A	H	A	A	H	A	H	A	A	A	H	A	H	H	A	H	A	A	A	H	A	A	H	A	H	A	A	H	A	H	A	H	A	H
Squ4F	Sequ0024TUF	H	A	A	H	A	H	H	A	H	H	A	A	A	A	A	H	A	A	H	A	H	A	A	A	A	A	H	H	A	H	A	A	A	H	A	A	H	A	H	A	A	A	H	H	A	H	A	H
Squ4F	Sequ1572BAC	H	A	A	H	A	H	H	A	H	H	A	A	A	A	A	H	A	A	H	A	H	A	A	A	A	A	H	H	A	H	A	A	A	H	A	A	H	A	H	A	H	A	H	H	A	H	A	H
Squ4F	Sequ0412TUF	H	A	A	H	A	H	H	A	H	H	A	A	A	A	A	H	A	A	H	A	H	A	A	A	A	A	H	H	A	H	A	A	A	H	A	A	H	A	H	A	H	A	H	H	A	A	A	H
Squ4F	Sequ0946BAC	A	A	A	H	A	H	H	A	H	H	A	A	A	H	A	H	A	A	A	A	A	A	A	A	A	A	H	H	H	H	A	A	H	H	H	A	H	A	H	A	H	A	H	H	A	A	A	H
Squ4F	Sequ0413TUF	A	A	A	H	A	H	H	A	H	H	A	A	A	H	A	H	A	A	A	A	A	A	A	A	A	A	H	H	H	H	A	A	H	H	H	A	H	A	H	A	H	A	H	H	H	A	A	H
Squ4F	Sequ0541TUF	A	A	A	H	A	H	H	A	H	H	A	A	A	H	A	H	A	A	A	A	A	A	A	A	A	A	H	H	H	H	A	A	H	H	H	A	H	A	H	A	H	A	H	H	H	A	A	H
Squ4F	Sequ0962TUF	A	A	A	H	A	H	H	A	H	H	A	A	A	H	A	H	A	A	A	A	A	A	A	A	A	A	H	H	H	H	A	A	H	H	H	A	H	A	H	A	H	A	H	H	H	A	A	H
Squ4F	Sequ1196BAC	A	A	A	H	A	H	H	A	H	H	A	A	A	H	A	H	A	A	A	A	A	A	A	A	A	A	H	H	H	H	A	A	H	H	H	A	H	A	H	A	H	A	H	H	H	A	A	H
Squ4F	Sequ2983BAC	A	A	A	H	A	H	H	A	H	H	A	A	A	H	A	H	A	A	A	A	A	A	A	A	A	A	H	H	H	H	A	A	H	H	H	A	H	A	H	A	H	A	H	H	H	A	A	H
Squ4F	Sequ3244BAC	A	A	A	H	A	H	H	A	H	H	A	A	A	H	A	H	A	A	A	A	A	A	A	A	A	A	H	H	H	H	A	A	H	H	H	A	H	A	H	A	H	A	H	H	H	A	A	H
Squ4F	Sequ0250TUF	A	A	A	H	A	H	H	A	H	H	A	A	A	H	A	H	A	A	A	A	A	A	A	A	A	A	H	H	H	H	A	A	H	H	H	A	H	A	H	A	H	A	H	H	H	A	A	H
Squ4F	Sequ1957BAC	A	A	A	H	A	H	H	A	H	H	A	A	A	H	A	H	A	A	A	A	A	A	A	A	A	A	H	H	H	H	A	A	H	H	H	A	H	A	H	A	H	A	H	H	H	A	A	H
Squ4F	Sequ0049TUF	A	A	A	H	A	H	H	A	H	H	A	A	A	H	A	H	A	A	A	A	A	A	A	A	A	A	H	H	H	H	A	A	H	H	H	A	H	A	H	A	H	A	H	H	H	A	A	H
Squ4F	Sequ0185TUF	A	A	A	H	A	H	H	A	H	H	A	A	A	H	A	H	A	A	A	A	A	A	A	A	A	A	H	H	H	H	A	A	H	H	H	A	H	A	H	A	H	A	H	H	H	A	A	H
Squ4F	Sequ0450TUF	A	A	A	H	A	H	H	A	H	H	A	A	A	H	A	H	A	A	A	A	A	A	A	A	A	A	H	H	H	H	A	A	H	H	H	A	H	A	H	A	H	A	H	H	H	A	A	H
Squ4F	Sequ0516TUF	A	A	A	H	A	H	H	A	H	H	A	A	A	H	A	H	A	A	A	A	A	A	A	A	A	A	H	H	H	H	A	A	H	H	H	A	H	A	H	A	H	A	H	H	H	A	A	H
Squ4F	Sequ0841TUF	A	A	A	H	A	H	H	A	H	H	A	A	A	H	A	H	A	A	A	A	A	A	A	A	A	A	H	H	H	H	A	A	H	H	H	A	H	A	H	A	H	A	H	H	H	A	A	H
Squ4F	Sequ0869TUF	A	A	A	H	A	H	H	A	H	H	A	A	A	H	A	H	A	A	A	A	A	A	A	A	A	A	H	H	H	H	A	A	H	H	H	A	H	A	H	A	H	A	H	H	H	A	A	H
Squ4F	Sequ0879TUF	A	A	A	H	A	H	H	A	H	H	A	A	A	H	A	H	A	A	A	A	A	A	A	A	A	A	H	H	H	H	A	A	H	H	H	A	H	A	H	A	H	A	H	H	H	A	A	H
Squ4F	Sequ0960TUF	A	A	A	H	A	H	H	A	H	H	A	A	A	H	A	H	A	A	A	A	A	A	A	A	A	A	H	H	H	H	A	A	H	H	H	A	H	A	H	A	H	A	H	H	H	A	A	H
Squ4F	Sequ1049TUF	A	A	A	H	A	H	H	A	H	H	A	A	A	H	A	H	A	A	A	A	A	A	A	A	A	A	H	H	H	H	A	A	H	H	H	A	H	A	H	A	H	A	H	H	H	A	A	H
Squ4F	Sequ1276BAC	A	A	A	H	A	H	H	A	H	H	A	A	A	H	A	H	A	A	A	A	A	A	A	A	A	A	H	H	H	H	A	A	H	H	H	A	H	A	H	A	H	A	H	H	H	A	A	H
Squ4F	Sequ1500BAC	A	A	A	H	A	H	H	A	H	H	A	A	A	H	A	H	A	A	A	A	A	A	A	A	A	A	H	H	H	H	A	A	H	H	H	A	H	A	H	A	H	A	H	H	H	A	A	H
Squ4F	Sequ1624BAC	A	A	A	H	A	H	H	A	H	H	A	A	A	H	A	H	A	A	A	A	A	A	A	A	A	A	H	H	H	H	A	A	H	H	H	A	H	A	H	A	H	A	H	H	H	A	A	H
Squ4F	Sequ2442BAC	A	A	A	H	A	H	H	A	H	H	A	A	A	H	A	H	A	A	A	A	A	A	A	A	A	A	H	H	H	H	A	A	H	H	H	A	H	A	H	A	H	A	H	H	H	A	A	H
Squ4F	Sequ3093BAC	A	A	A	H	A	H	H	A	H	H	A	A	A	H	A	H	A	A	A	A	A	A	A	A	A	A	H	H	H	H	A	A	H	H	H	A	H	A	H	A	H	A	H	H	H	A	A	H
Squ4F	Sequ03029SNP	-	A	A	H	A	H	H	A	H	A	A	A	A	H	A	H	A	A	A	A	A	A	A	A	A	A	H	H	H	H	A	A	H	H	H	A	H	A	H	A	H	A	H	H	H	A	A	H
Squ4F	Sequ03208SNP	A	A	A	H	A	H	-	A	-	A	A	A	A	H	A	-	A	A	A	A	A	A	A	A	A	A	H	H	H	H	A	A	H	-	H	A	H	A	H	A	H	A	H	H	H	A	A	H
Squ4F	Sequ03598SNP	A	A	A	H	A	H	H	A	H	A	A	A	A	H	A	H	A	A	A	A	A	A	A	A	A	A	A	H	H	H	A	A	H	H	H	A	H	A	H	A	H	A	H	H	H	A	A	H
Squ5F	Sequ0241TUF	A	H	A	H	A	H	H	A	H	H	H	H	H	A	H	A	A	A	H	A	A	A	A	H	A	H	A	A	A	A	A	A	H	H	A	H	H	H	H	A	A	A	H	A	H	A	A	H
Squ5F	Sequ1154BAC	A	H	A	H	A	H	H	A	H	H	H	H	H	A	H	A	A	A	H	A	A	A	A	H	A	H	A	A	A	A	A	A	H	H	A	H	H	H	H	A	A	A	H	A	H	A	A	H
Squ5F	Sequ1573BAC	A	H	A	H	A	H	H	A	H	H	H	H	H	A	H	A	A	A	H	A	A	A	A	H	A	H	A	A	A	A	A	A	H	H	A	H	H	H	H	A	A	A	H	A	H	A	A	H
Squ5F	Sequ0807TUF	A	A	A	H	A	H	H	A	H	H	H	H	H	A	H	A	A	A	H	A	A	A	A	H	A	H	A	A	A	A	A	A	H	H	A	A	H	H	H	A	A	A	H	A	H	A	A	H
Squ5F	Sequ0705TUF	A	A	A	H	A	H	H	A	H	H	H	H	H	A	H	A	A	A	H	A	A	A	A	H	A	H	A	A	A	A	A	A	H	H	A	A	H	H	H	A	A	A	H	A	H	A	A	H
Squ5F	Sequ1982BAC	A	A	A	H	A	H	H	A	H	H	H	H	H	A	H	A	A	A	H	A	A	A	A	H	A	H	A	A	A	A	A	A	H	H	A	A	H	H	H	A	A	A	H	A	H	A	A	H
Squ5F	Sequ0306TUF	A	A	A	H	A	H	H	A	H	H	H	H	H	A	H	A	A	A	H	A	A	A	A	H	A	H	A	A	A	A	A	A	H	H	A	A	A	H	H	A	A	A	H	A	H	A	A	H
Squ5F	Sequ0044TUF	A	A	A	H	A	H	H	A	H	H	H	H	H	A	H	A	A	A	A	A	A	A	A	H	A	H	A	A	A	A	A	A	H	H	A	A	A	H	H	A	A	A	H	A	H	A	A	H
Squ5F	Sequ0068TUF	A	A	A	H	A	H	H	A	H	H	H	H	H	A	H	A	A	A	A	A	A	A	A	H	A	H	A	A	A	A	A	A	H	H	A	A	A	H	H	A	A	A	H	A	H	A	A	H
Squ5F	Sequ0188TUF	A	A	A	H	A	H	H	A	H	H	H	H	H	A	H	A	A	A	A	A	A	A	A	H	A	H	A	A	A	A	A	A	H	H	A	A	A	H	H	A	A	A	H	A	H	A	A	H
Squ5F	Sequ0189TUF	A	A	A	H	A	H	H	A	H	H	H	H	H	A	H	A	A	A	A	A	A	A	A	H	A	H	A	A	A	A	A	A	H	H	A	A	A	H	H	A	A	A	H	A	H	A	A	H
Squ5F	Sequ0219TUF	A	A	A	H	A	H	H	A	H	H	H	H	H	A	H	A	A	A	A	A	A	A	A	H	A	H	A	A	A	A	A	A	H	H	A	A	A	H	H	A	A	A	H	A	H	A	A	H
Squ5F	Sequ0238TUF	A	A	A	H	A	H	H	A	H	H	H	H	H	A	H	A	A	A	A	A	A	A	A	H	A	H	A	A	A	A	A	A	H	H	A	A	A	H	H	A	A	A	H	A	H	A	A	H
Squ5F	Sequ0315TUF	A	A	A	H	A	H	H	A	H	H	H	H	H	A	H	A	A	A	A	A	A	A	A	H	A	H	A	A	A	A	A	A	H	H	A	A	A	H	H	A	A	A	H	A	H	A	A	H
Squ5F	Sequ0512TUF	A	A	A	H	A	H	H	A	H	H	H	H	H	A	H	A	A	A	A	A	A	A	A	H	A	H	A	A	A	A	A	A	H	H	A	A	A	H	H	A	A	A	H	A	H	A	A	H
Squ5F	Sequ0542TUF	A	A	A	H	A	H	H	A	H	H	H	H	H	A	H	A	A	A	A	A	A	A	A	H	A	H	A	A	A	A	A	A	H	H	A	A	A	H	H	A	A	A	H	A	H	A	A	H
Squ5F	Sequ0571TUF	A	A	A	H	A	H	H	A	H	H	H	H	H	A	H	A	A	A	A	A	A	A	A	H	A	H	A	A	A	A	A	A	H	H	A	A	A	H	H	A	A	A	H	A	H	A	A	H
Squ5F	Sequ0592TUF	A	A	A	H	A	H	H	A	H	H	H	H	H	A	H	A	A	A	A	A	A	A	A	H	A	H	A	A	A	A	A	A	H	H	A	A	A	H	H	A	A	A	H	A	H	A	A	H
Squ5F	Sequ0702TUF	A	A	A	H	A	H	H	A	H	H	H	H	H	A	H	A	A	A	A	A	A	A	A	H	A	H	A	A	A	A	A	A	H	H	A	A	A	H	H	A	A	A	H	A	H	A	A	H
Squ5F	Sequ0721TUF	A	A	A	H	A	H	H	A	H	H	H	H	H	A	H	A	A	A	A	A	A	A	A	H	A	H	A	A	A	A	A	A	H	H	A	A	A	H	H	A	A	A	H	A	H	A	A	H
Squ5F	Sequ0722TUF	A	A	A	H	A	H	H	A	H	H	H	H	H	A	H	A	A	A	A	A	A	A	A	H	A	H	A	A	A	A	A	A	H	H	A	A	A	H	H	A	A	A	H	A	H	A	A	H
Squ5F	Sequ0777TUF	A	A	A	H	A	H	H	A	H	H	H	H	H	A	H	A	A	A	A	A	A	A	A	H	A	H	A	A	A	A	A	A	H	H	A	A	A	H	H	A	A	A	H	A	H	A	A	H
Squ5F	Sequ0860TUF	A	A	A	H	A	H	H	A	H	H	H	H	H	A	H	A	A	A	A	A	A	A	A	H	A	H	A	A	A	A	A	A	H	H	A	A	A	H	H	A	A	A	H	A	H	A	A	H
Squ5F	Sequ0970TUF	A	A	A	H	A	H	H	A	H	H	H	H	H	A	H	A	A	A	A	A	A	A	A	H	A	H	A	A	A	A	A	A	H	H	A	A	A	H	H	A	A	A	H	A	H	A	A	H
Squ5F	Sequ0999TUF	A	A	A	H	A	H	H	A	H	H	H	H	H	A	H	A	A	A	A	A	A	A	A	H	A	H	A	A	A	A	A	A	H	H	A	A	A	H	H	A	A	A	H	A	H	A	A	H
Squ5F	Sequ1040TUF	A	A	A	H	A	H	H	A	H	H	H	H	H	A	H	A	A	A	A	A	A	A	A	H	A	H	A	A	A	A	A	A	H	H	A	A	A	H	H	A	A	A	H	A	H	A	A	H
Squ5F	Sequ0110BAC	A	A	A	H	A	H	H	A	H	H	H	H	H	A	H	A	A	A	A	A	A	A	A	H	A	H	A	A	A	A	A	A	H	H	A	A	A	H	H	A	A	A	H	A	H	A	A	H
Squ5F	Sequ0957BAC	A	A	A	H	A	H	H	A	H	H	H	H	H	A	H	A	A	A	A	A	A	A	A	H	A	H	A	A	A	A	A	A	H	H	A	A	A	H	H	A	A	A	H	A	H	A	A	H
Squ5F	Sequ1111BAC	A	A	A	H	A	H	H	A	H	H	H	H	H	A	H	A	A	A	A	A	A	A	A	H	A	H	A	A	A	A	A	A	H	H	A	A	A	H	H	A	A	A	H	A	H	A	A	H
Squ5F	Sequ1483BAC	A	A	A	H	A	H	H	A	H	H	H	H	H	A	H	A	A	A	A	A	A	A	A	H	A	H	A	A	A	A	A	A	H	H	A	A	A	H	H	A	A	A	H	A	H	A	A	H
Squ5F	Sequ1793BAC	A	A	A	H	A	H	H	A	H	H	H	H	H	A	H	A	A	A	A	A	A	A	A	H	A	H	A	A	A	A	A	A	H	H	A	A	A	H	H	A	A	A	H	A	H	A	A	H
Squ5F	Sequ1979BAC	A	A	A	H	A	H	H	A	H	H	H	H	H	A	H	A	A	A	A	A	A	A	A	H	A	H	A	A	A	A	A	A	H	H	A	A	A	H	H	A	A	A	H	A	H	A	A	H
Squ5F	Sequ2582BAC	A	A	A	H	A	H	H	A	H	H	H	H	H	A	H	A	A	A	A	A	A	A	A	H	A	H	A	A	A	A	A	A	H	H	A	A	A	H	H	A	A	A	H	A	H	A	A	H
Squ5F	Sequ1668BAC	A	A	A	H	A	H	H	A	A	H	H	H	H	A	H	A	A	A	A	A	A	A	A	H	A	H	A	A	A	A	A	A	H	H	A	A	A	H	H	A	A	A	H	A	H	A	A	H
Squ5F	Sequ0604TUF	A	A	H	H	A	A	A	A	A	H	H	H	A	A	A	A	A	A	A	A	H	A	A	A	H	A	A	A	A	A	A	A	H	A	A	A	A	H	H	A	A	A	H	H	H	A	A	H
Squ5F	Sequ0931BAC	A	A	H	H	A	A	A	A	A	H	H	H	A	A	A	A	A	A	A	A	H	A	A	A	H	A	A	A	A	A	A	A	H	A	A	A	A	H	H	A	A	A	H	H	H	A	A	H
Squ5F	Sequ0668BAC	A	A	H	H	A	A	A	A	A	H	H	H	A	H	A	H	A	A	A	A	H	A	H	A	H	A	A	H	A	A	H	A	H	A	A	A	A	H	A	A	A	A	H	H	A	A	A	H
Squ5F	Sequ1174BAC	H	A	H	A	A	A	A	H	A	H	H	H	A	H	A	H	A	A	A	H	H	A	H	A	H	A	A	H	A	A	H	A	A	A	A	A	A	H	A	A	A	A	H	H	A	A	A	H
Squ6F	Sequ0003TUF	H	A	A	A	H	A	H	A	A	H	A	H	H	H	H	A	A	A	A	H	A	A	H	H	H	H	A	A	H	H	H	A	H	H	A	H	A	H	A	A	A	A	A	A	A	H	A	H
Squ6F	Sequ0138TUF	H	A	A	A	H	A	H	A	A	H	A	H	H	H	H	A	A	A	A	H	A	A	H	H	H	H	A	A	H	H	H	A	H	H	A	H	A	H	A	A	A	A	A	A	A	H	A	H
Squ6F	Sequ0140TUF	H	A	A	A	H	A	H	A	A	H	A	H	H	H	H	A	A	A	A	H	A	A	H	H	H	H	A	A	H	H	H	A	H	H	A	H	A	H	A	A	A	A	A	A	A	H	A	H
Squ6F	Sequ0239TUF	H	A	A	A	H	A	H	A	A	H	A	H	H	H	H	A	A	A	A	H	A	A	H	H	H	H	A	A	H	H	H	A	H	H	A	H	A	H	A	A	A	A	A	A	A	H	A	H
Squ6F	Sequ0329TUF	H	A	A	A	H	A	H	A	A	H	A	H	H	H	H	A	A	A	A	H	A	A	H	H	H	H	A	A	H	H	H	A	H	H	A	H	A	H	A	A	A	A	A	A	A	H	A	H
Squ6F	Sequ0432TUF	H	A	A	A	H	A	H	A	A	H	A	H	H	H	H	A	A	A	A	H	A	A	H	H	H	H	A	A	H	H	H	A	H	H	A	H	A	H	A	A	A	A	A	A	A	H	A	H
Squ6F	Sequ0433TUF	H	A	A	A	H	A	H	A	A	H	A	H	H	H	H	A	A	A	A	H	A	A	H	H	H	H	A	A	H	H	H	A	H	H	A	H	A	H	A	A	A	A	A	A	A	H	A	H
Squ6F	Sequ0515TUF	H	A	A	A	H	A	H	A	A	H	A	H	H	H	H	A	A	A	A	H	A	A	H	H	H	H	A	A	H	H	H	A	H	H	A	H	A	H	A	A	A	A	A	A	A	H	A	H
Squ6F	Sequ0597TUF	H	A	A	A	H	A	H	A	A	H	A	H	H	H	H	A	A	A	A	H	A	A	H	H	H	H	A	A	H	H	H	A	H	H	A	H	A	H	A	A	A	A	A	A	A	H	A	H
Squ6F	Sequ0617TUF	H	A	A	A	H	A	H	A	A	H	A	H	H	H	H	A	A	A	A	H	A	A	H	H	H	H	A	A	H	H	H	A	H	H	A	H	A	H	A	A	A	A	A	A	A	H	A	H
Squ6F	Sequ0642TUF	H	A	A	A	H	A	H	A	A	H	A	H	H	H	H	A	A	A	A	H	A	A	H	H	H	H	A	A	H	H	H	A	H	H	A	H	A	H	A	A	A	A	A	A	A	H	A	H
Squ6F	Sequ0656TUF	H	A	A	A	H	A	H	A	A	H	A	H	H	H	H	A	A	A	A	H	A	A	H	H	H	H	A	A	H	H	H	A	H	H	A	H	A	H	A	A	A	A	A	A	A	H	A	H
Squ6F	Sequ0856TUF	H	A	A	A	H	A	H	A	A	H	A	H	H	H	H	A	A	A	A	H	A	A	H	H	H	H	A	A	H	H	H	A	H	H	A	H	A	H	A	A	A	A	A	A	A	H	A	H
Squ6F	Sequ0862TUF	H	A	A	A	H	A	H	A	A	H	A	H	H	H	H	A	A	A	A	H	A	A	H	H	H	H	A	A	H	H	H	A	H	H	A	H	A	H	A	A	A	A	A	A	A	H	A	H
Squ6F	Sequ0930TUF	H	A	A	A	H	A	H	A	A	H	A	H	H	H	H	A	A	A	A	H	A	A	H	H	H	H	A	A	H	H	H	A	H	H	A	H	A	H	A	A	A	A	A	A	A	H	A	H
Squ6F	Sequ1000TUF	H	A	A	A	H	A	H	A	A	H	A	H	H	H	H	A	A	A	A	H	A	A	H	H	H	H	A	A	H	H	H	A	H	H	A	H	A	H	A	A	A	A	A	A	A	H	A	H
Squ6F	Sequ0153BAC	H	A	A	A	H	A	H	A	A	H	A	H	H	H	H	A	A	A	A	H	A	A	H	H	H	H	A	A	H	H	H	A	H	H	A	H	A	H	A	A	A	A	A	A	A	H	A	H
Squ6F	Sequ0168BAC	H	A	A	A	H	A	H	A	A	H	A	H	H	H	H	A	A	A	A	H	A	A	H	H	H	H	A	A	H	H	H	A	H	H	A	H	A	H	A	A	A	A	A	A	A	H	A	H
Squ6F	Sequ0233BAC	H	A	A	A	H	A	H	A	A	H	A	H	H	H	H	A	A	A	A	H	A	A	H	H	H	H	A	A	H	H	H	A	H	H	A	H	A	H	A	A	A	A	A	A	A	H	A	H
Squ6F	Sequ0400BAC	H	A	A	A	H	A	H	A	A	H	A	H	H	H	H	A	A	A	A	H	A	A	H	H	H	H	A	A	H	H	H	A	H	H	A	H	A	H	A	A	A	A	A	A	A	H	A	H
Squ6F	Sequ0653BAC	H	A	A	A	H	A	H	A	A	H	A	H	H	H	H	A	A	A	A	H	A	A	H	H	H	H	A	A	H	H	H	A	H	H	A	H	A	H	A	A	A	A	A	A	A	H	A	H
Squ6F	Sequ1868BAC	H	A	A	A	H	A	H	A	A	H	A	H	H	H	H	A	A	A	A	H	A	A	H	H	H	H	A	A	H	H	H	A	H	H	A	H	A	H	A	A	A	A	A	A	A	H	A	H
Squ6F	Sequ2694BAC	H	A	A	A	H	A	H	A	A	H	A	H	H	H	H	A	A	A	A	H	A	A	H	H	H	H	A	A	H	H	H	A	H	H	A	H	A	H	A	A	A	A	A	A	A	H	A	H
Squ6F	Sequ3181BAC	H	A	A	A	H	A	H	A	A	H	A	H	H	H	H	A	A	A	A	H	A	A	H	H	H	H	A	A	H	H	H	A	H	H	A	H	A	H	A	A	A	A	A	A	A	H	A	H
Squ6F	Sequ3298BAC	H	A	A	A	H	A	H	A	A	H	A	H	H	H	H	A	A	A	A	H	A	A	H	H	H	H	A	A	H	H	H	A	H	H	A	H	A	H	A	A	A	A	A	A	A	H	A	H
Squ6F	Sequ03443SNP	H	A	A	A	-	A	H	A	A	H	A	H	H	H	H	A	A	A	A	H	A	A	H	H	H	H	A	A	H	H	H	A	H	H	A	H	A	H	A	A	A	A	A	A	A	H	A	H
Squ6F	Sequ0414TUF	H	A	A	A	H	A	H	H	A	H	A	H	H	H	H	A	A	A	H	H	A	A	H	H	H	H	A	A	H	H	H	A	H	H	A	H	H	H	A	A	A	A	H	A	A	H	A	H
Squ6F	Sequ0526TUF	H	A	A	A	H	A	H	H	A	H	A	H	H	H	H	A	A	A	H	H	A	A	H	H	H	H	A	A	H	H	H	A	H	H	A	H	H	H	A	A	A	A	H	A	A	H	A	H
Squ6F	Sequ0511TUF	H	A	H	A	H	A	H	H	A	H	A	A	H	H	H	A	A	A	H	H	A	A	A	A	H	H	A	H	H	H	H	A	H	H	A	H	H	H	A	H	A	A	H	A	A	H	A	H
Squ6F	Sequ2918BAC	H	A	H	A	H	A	H	H	A	H	H	A	H	H	H	A	A	A	H	H	A	A	A	A	H	H	A	H	H	H	H	A	H	H	A	H	H	H	A	H	A	A	H	A	A	H	A	A
Squ6F	Sequ0671TUF	H	A	H	H	H	H	A	H	H	A	H	A	H	H	H	H	H	A	H	A	H	H	A	A	H	H	A	H	H	H	H	A	H	H	A	H	H	H	A	H	A	H	H	A	A	H	H	A
Squ7F	Sequ0069TUF	H	A	A	H	A	H	A	A	H	H	A	H	A	A	H	A	A	H	H	A	A	A	A	H	A	H	H	H	H	A	A	A	A	A	A	A	A	A	A	H	H	A	A	H	A	A	A	H
Squ7F	Sequ0106TUF	H	A	A	H	A	H	A	A	H	H	A	H	A	A	H	A	A	H	H	A	A	A	A	H	A	H	H	H	H	A	A	A	A	A	A	A	A	A	A	H	H	A	A	H	A	A	A	H
Squ7F	Sequ0451TUF	H	A	A	H	A	H	A	A	H	H	A	H	A	A	H	A	A	H	H	A	A	A	A	H	A	H	H	H	H	A	A	A	A	A	A	A	A	A	A	H	H	A	A	H	A	A	A	H
Squ7F	Sequ0786TUF	H	A	A	H	A	H	A	A	H	H	A	H	A	A	H	A	A	H	H	A	A	A	A	H	A	H	H	H	H	A	A	A	A	A	A	A	A	A	A	H	H	A	A	H	A	A	A	H
Squ7F	Sequ1041TUF	H	A	A	H	A	H	A	A	H	H	A	H	A	A	H	A	A	H	H	A	A	A	A	H	A	H	H	H	H	A	A	A	A	A	A	A	A	A	A	H	H	A	A	H	A	A	A	H
Squ7F	Sequ1147BAC	H	A	A	H	A	H	A	A	H	H	A	H	A	A	H	A	A	H	H	A	A	A	A	H	A	H	H	H	H	A	A	A	A	A	A	A	A	A	A	H	H	A	A	H	A	A	A	H
Squ7F	Sequ04236SNP	H	A	A	H	A	H	A	A	H	H	A	H	A	A	H	A	A	H	H	A	A	A	A	H	A	H	H	H	H	A	A	A	A	A	A	A	A	A	A	H	H	A	A	H	A	A	A	H
Squ7F	Sequ01113SNP	H	A	A	H	A	H	A	A	H	H	A	H	A	A	H	A	A	H	H	A	A	A	A	H	A	H	H	H	H	A	A	A	A	A	A	A	A	A	A	H	H	A	A	H	A	A	A	H
Squ7F	Sequ1041BAC	A	A	A	H	A	H	A	A	H	H	A	H	A	A	H	A	A	H	H	A	A	A	A	H	A	H	H	H	H	A	A	A	A	A	A	A	A	A	A	H	H	A	A	H	A	A	A	H
Squ7F	Sequ0169TUF	A	A	A	H	A	H	A	A	H	H	A	H	A	A	H	A	A	H	H	A	A	A	A	H	A	H	H	H	H	A	A	A	A	A	A	A	A	A	A	H	H	A	A	H	A	A	A	A
Squ7F	Sequ0268TUF	A	A	A	H	A	H	A	A	H	H	A	H	A	A	H	A	A	H	H	A	A	A	A	H	A	H	H	H	H	A	A	A	A	A	A	A	A	A	A	H	H	A	A	H	A	A	A	A
Squ7F	Sequ0567TUF	A	A	A	H	A	H	A	A	H	H	A	H	A	A	H	A	A	H	H	A	A	A	A	H	A	H	H	H	H	A	A	A	A	A	A	A	A	A	A	H	H	A	A	H	A	A	A	A
Squ7F	Sequ3208BAC	A	A	A	H	A	H	A	A	H	H	A	H	A	A	H	A	A	H	H	A	A	A	A	H	A	H	H	H	H	A	A	A	A	A	A	A	A	A	A	H	H	A	A	H	A	A	A	A
Squ7F	Sequ0447TUF	A	A	A	H	A	H	A	A	H	H	A	H	A	A	H	A	A	H	H	A	A	A	A	H	A	H	H	H	H	A	A	A	A	A	A	A	A	A	A	H	H	A	H	H	A	A	A	A
Squ7F	Sequ0462TUF	A	A	A	H	A	H	A	A	H	H	A	H	A	A	H	A	A	H	H	A	A	A	A	H	A	H	H	H	H	A	A	A	A	A	A	A	A	A	A	H	H	A	H	H	A	A	A	A
Squ7F	Sequ0569TUF	A	A	A	H	A	H	A	A	H	H	A	H	A	A	H	A	A	H	H	A	A	A	A	H	A	H	H	H	H	A	A	A	A	A	A	A	A	A	A	H	H	A	H	H	A	A	A	A
Squ7F	Sequ0825TUF	A	A	A	H	A	H	A	A	H	H	A	H	A	A	H	A	A	H	H	A	A	A	A	H	A	H	H	H	H	A	A	A	A	A	A	A	A	A	A	H	H	A	H	H	A	A	A	A
Squ7F	Sequ1120BAC	A	A	A	H	A	H	A	A	H	H	A	H	A	A	H	A	A	H	H	A	A	A	A	H	A	H	H	H	H	A	A	A	A	A	A	A	A	A	A	H	H	A	H	H	A	A	A	A
Squ7F	Sequ1757BAC	A	A	A	H	A	H	A	A	H	H	A	H	A	A	H	A	A	H	H	A	A	A	A	H	A	H	H	H	H	A	A	A	A	A	A	A	A	A	A	H	H	A	H	H	A	A	A	A
Squ7F	Sequ00005SNP	A	A	A	H	A	H	A	A	H	H	A	H	A	A	H	A	A	H	H	A	A	A	A	H	A	H	H	H	H	A	A	A	A	A	A	A	A	A	A	H	H	A	H	H	A	A	A	A
Squ7F	Sequ00393SNP	A	A	A	-	A	H	A	A	H	H	A	H	A	A	H	A	A	H	H	A	A	A	A	H	A	H	H	H	H	A	A	A	A	A	A	A	A	A	A	H	H	A	H	H	A	A	A	A
Squ7F	Sequ0849TUF	A	A	A	A	A	H	A	A	H	H	A	H	A	A	H	A	A	H	H	A	A	A	A	H	A	H	H	H	H	A	A	A	A	A	A	A	A	A	A	H	H	A	H	H	A	A	A	A
Squ7F	Sequ0582TUF	A	A	A	A	A	H	A	A	H	H	A	H	A	A	H	A	A	H	H	A	A	A	A	H	A	H	H	H	H	A	H	A	A	A	A	A	A	A	A	H	H	A	H	H	A	A	A	A
Squ7F	Sequ0670TUF	A	A	A	A	A	H	A	A	H	H	A	H	A	A	H	A	A	H	H	A	A	A	A	H	A	H	H	H	H	A	H	A	A	A	A	A	A	A	A	H	H	A	H	H	A	A	A	A
Squ7F	Sequ0623TUF	A	A	A	A	A	H	A	A	H	H	A	H	A	A	H	A	A	H	H	A	A	A	A	H	A	H	H	H	H	A	H	A	A	A	A	A	A	A	A	H	H	A	H	H	A	A	A	A
Squ7F	Sequ2990BAC	A	A	A	A	H	H	A	A	H	H	A	H	A	A	H	A	A	H	H	A	A	A	A	H	A	H	H	H	A	A	H	A	A	A	A	A	A	A	A	H	H	A	H	H	A	A	A	A
Squ7F	Sequ00662SNP	A	A	A	A	H	H	A	A	H	H	H	H	A	A	H	A	A	H	H	A	A	A	A	H	A	H	H	H	A	A	H	A	A	A	A	A	A	H	A	H	H	A	H	H	A	A	A	A
Squ7F	Sequ0416TUF	A	A	A	A	H	H	A	A	H	H	H	H	A	A	H	A	A	H	H	A	A	A	A	H	A	H	H	H	A	A	H	A	A	A	A	A	A	H	A	H	H	A	H	H	A	A	A	A
Squ7F	Sequ1209BAC	A	A	A	A	H	H	A	A	H	H	H	H	A	A	H	A	A	H	H	A	A	A	A	H	A	H	H	H	A	A	H	A	A	A	A	A	A	H	A	H	H	A	H	H	A	A	A	A
Squ7F	Sequ0784TUF	A	A	A	A	H	H	A	A	H	A	H	H	A	A	H	A	A	H	H	A	A	A	A	H	A	H	H	H	A	A	H	A	A	A	A	A	A	H	H	H	H	H	H	H	A	A	A	A
Squ7F	Sequ1421BAC	A	A	A	A	H	H	A	A	H	A	H	H	A	A	H	A	A	H	H	A	A	A	A	H	A	H	H	H	A	A	H	A	A	A	A	A	A	H	H	H	H	H	H	H	A	A	A	A
Squ7F	Sequ0382BAC	A	A	A	A	H	H	A	A	H	A	H	H	A	A	H	A	A	H	H	A	A	A	A	H	A	A	H	H	A	A	H	A	A	A	H	H	A	H	H	H	H	H	H	H	H	A	A	A
Squ7F	Sequ1628BAC	A	A	A	A	H	H	A	A	H	A	H	H	A	A	H	A	A	A	H	A	A	A	A	H	A	A	H	H	A	A	H	A	A	A	H	H	A	H	H	H	H	H	H	H	H	A	A	A
Squ7F	Sequ00355_1SNP	A	A	A	A	H	H	A	A	H	A	H	H	A	A	H	A	A	A	H	A	A	A	A	H	A	A	H	H	A	A	H	A	A	A	H	H	A	H	H	H	H	H	H	H	H	A	A	A
Squ7F	Sequ1700BAC	A	A	A	A	H	H	A	A	H	A	H	H	A	H	H	H	H	A	H	A	H	A	A	A	A	A	H	A	A	A	H	A	A	A	H	H	A	H	H	H	H	H	H	H	H	A	A	H
Squ8F	Sequ0074TUF	H	H	A	H	A	H	H	H	H	H	H	H	A	H	H	A	A	A	H	H	H	A	H	H	H	H	A	H	H	A	H	H	H	A	H	A	H	A	A	A	A	A	A	H	H	H	A	A
Squ8F	Sequ0409TUF	H	H	A	H	A	H	H	H	H	H	H	H	A	H	H	A	A	A	H	H	H	A	H	H	H	H	A	H	H	A	H	H	H	A	H	A	H	A	A	A	A	A	A	H	H	H	A	A
Squ8F	Sequ0431TUF	H	H	A	H	A	H	H	H	H	H	H	H	A	H	H	A	A	A	H	H	H	A	H	H	H	H	A	H	H	A	H	H	H	A	H	A	H	A	A	A	A	A	A	H	H	H	A	A
Squ8F	Sequ0851TUF	H	H	A	H	A	H	H	H	H	H	H	H	A	H	H	A	A	A	H	H	H	A	H	H	H	H	A	H	H	A	H	H	H	A	H	A	H	A	A	A	A	A	A	H	H	H	A	A
Squ8F	Sequ0906TUF	H	H	A	H	A	H	H	H	H	H	H	H	A	H	H	A	A	A	H	H	H	A	H	H	H	H	A	H	H	A	H	H	H	A	H	A	H	A	A	A	A	A	A	H	H	H	A	A
Squ8F	Sequ2078BAC	H	H	A	H	A	H	H	H	H	H	H	H	A	H	H	A	A	A	H	H	H	A	H	H	H	H	A	H	H	A	H	H	H	A	H	A	H	A	A	A	A	A	A	H	H	H	A	A
Squ8F	Sequ3175BAC	H	H	A	H	A	H	H	H	H	H	H	H	A	H	H	A	A	A	H	H	H	A	H	H	H	H	A	H	H	A	H	H	H	A	H	A	H	A	A	A	A	A	A	H	H	H	A	A
Squ8F	Sequ1769BAC	H	H	H	H	A	H	H	H	H	H	H	A	A	H	H	A	A	A	H	H	H	H	H	H	H	H	A	H	H	A	H	H	H	A	H	A	H	A	A	A	A	A	A	H	H	H	A	A
Squ8F	Sequ0101TUF	H	H	H	H	A	H	H	H	H	H	H	A	A	H	H	A	A	A	H	H	H	H	H	H	H	H	A	H	H	A	H	H	H	A	H	A	H	A	A	A	A	H	A	H	H	H	A	A
Squ8F	Sequ0503TUF	H	H	H	H	A	H	H	H	H	H	H	A	A	H	H	A	A	A	H	H	H	H	H	H	H	H	A	H	H	A	H	H	H	A	H	A	H	A	A	A	A	H	A	H	H	H	A	A
Squ8F	Sequ0610TUF	H	H	H	H	A	H	H	H	H	H	H	A	A	H	H	A	A	A	H	H	H	H	H	H	H	H	A	H	H	A	H	H	H	A	H	A	H	A	A	A	A	H	A	H	H	H	A	A
Squ8F	Sequ0985TUF	H	H	H	H	A	H	H	H	H	H	H	A	A	H	H	A	A	A	H	H	H	H	H	H	H	H	A	H	H	A	H	H	H	A	H	A	H	A	A	A	A	H	A	H	H	H	A	A
Squ8F	Sequ1013TUF	H	H	H	H	A	H	H	H	H	H	H	A	A	H	H	A	A	A	H	H	H	H	H	H	H	H	A	H	H	A	H	H	H	A	H	A	H	A	A	A	A	H	A	H	H	H	A	A
Squ8F	Sequ0507BAC	H	H	H	H	A	H	H	H	H	H	H	A	A	H	H	A	A	A	H	H	H	H	H	H	H	H	A	H	H	A	H	H	H	A	H	A	H	A	A	A	A	H	A	H	H	H	A	A
Squ8F	Sequ0575BAC	H	H	H	H	A	H	H	H	H	H	H	A	A	H	H	A	A	A	H	H	H	H	H	H	H	H	A	H	H	A	H	H	H	A	H	A	H	A	A	A	A	H	A	H	H	H	A	A
Squ8F	Sequ0670BAC	H	H	H	H	A	H	H	H	H	H	H	A	A	H	H	A	A	A	H	H	H	H	H	H	H	H	A	H	H	A	H	H	H	A	H	A	H	A	A	A	A	H	A	H	H	H	A	A
Squ8F	Sequ2198BAC	H	H	H	H	A	H	H	H	H	H	H	A	A	H	H	A	A	A	H	H	H	H	H	H	H	H	A	H	H	A	H	H	H	A	H	A	H	A	A	A	A	H	A	H	H	H	A	A
Squ8F	Sequ2218BAC	H	H	H	H	A	H	H	H	H	H	H	A	A	H	H	A	A	A	H	H	H	H	H	H	H	H	A	H	H	A	H	H	H	A	H	A	H	A	A	A	A	H	A	H	H	H	A	A
Squ8F	Sequ2536BAC	H	H	H	H	A	H	H	H	H	H	H	A	A	H	H	A	A	A	H	H	H	H	H	H	H	H	A	H	H	A	H	H	H	A	H	A	H	A	A	A	A	H	A	H	H	H	A	A
Squ8F	Sequ3193BAC	H	H	H	H	A	H	H	H	H	H	H	A	A	H	H	A	A	A	H	H	H	H	H	H	H	H	A	H	H	A	H	H	H	A	H	A	H	A	A	A	A	H	A	H	H	H	A	A
Squ8F	Sequ3288BAC	H	H	H	H	A	H	H	H	H	H	H	A	A	H	H	A	A	A	H	H	H	H	H	H	H	H	A	H	H	A	H	H	H	A	H	A	H	A	A	A	A	H	A	H	H	H	A	A
Squ8F	Sequ00955SNP	H	H	H	H	A	H	H	H	H	H	H	A	A	H	H	A	A	A	H	H	H	H	H	H	H	H	A	H	H	A	H	H	H	A	H	A	H	A	A	A	A	H	A	H	H	H	A	A
Squ8F	Sequ01036SNP	H	H	H	H	A	H	H	H	H	H	H	A	A	H	H	A	A	A	H	H	H	H	H	H	H	H	A	H	H	A	H	H	H	A	H	A	H	A	A	A	A	H	A	H	H	H	A	A
Squ8F	Sequ02608SNP	H	H	H	H	A	H	H	H	H	H	H	A	A	H	H	A	A	A	H	H	H	H	H	H	H	H	A	H	H	A	H	H	H	A	H	A	H	A	A	A	A	H	A	H	H	H	A	A
Squ8F	Sequ02777SNP	H	H	H	H	A	H	H	H	H	H	H	A	A	H	H	A	A	A	H	H	H	H	H	H	H	H	A	H	H	A	H	H	H	A	H	A	H	A	A	A	A	H	A	H	H	H	A	A
Squ8F	Sequ1039TUF	H	H	H	H	A	H	H	A	H	H	H	A	A	H	H	A	A	A	H	H	A	H	H	H	H	H	H	H	H	A	H	H	A	A	H	A	H	H	A	A	H	H	A	H	H	H	A	A
Squ8F	Sequ2385BAC	H	H	H	H	A	H	H	A	A	H	A	A	A	H	H	H	A	H	A	H	A	H	H	H	A	H	H	A	H	A	H	H	A	A	H	A	A	H	A	A	H	H	A	H	A	H	A	H
Squ8F	Sequ0883TUF	H	H	H	H	A	H	H	A	A	H	A	A	A	H	H	H	A	H	A	H	A	H	H	H	A	H	H	A	H	A	H	H	A	A	H	A	A	H	A	A	H	H	A	H	A	H	A	H
Squ8F	Sequ0650BAC	H	H	H	H	A	H	H	A	A	H	A	A	A	H	A	H	A	H	A	H	A	H	A	H	A	H	H	A	A	A	H	A	A	A	A	A	A	A	H	A	H	H	A	H	A	H	A	H
Squ8F	Sequ0801TUF	H	H	H	H	A	H	H	A	A	H	A	A	A	H	A	H	A	H	A	H	A	H	H	H	A	H	H	A	H	A	H	H	A	A	H	A	A	H	H	A	H	H	A	H	A	H	A	H
Squ8F	Sequ02929SNP	H	H	H	H	A	A	H	A	A	H	A	A	A	A	A	H	A	H	A	H	A	H	H	H	A	H	H	A	H	A	H	H	A	A	H	A	A	H	H	A	H	H	A	H	A	H	A	H
Squ9F	Sequ0929TUF	A	H	H	H	A	A	H	A	A	A	H	H	A	A	A	H	A	A	H	H	A	H	H	H	A	H	H	H	H	A	A	H	H	H	A	A	H	H	A	H	H	H	A	H	A	A	A	A
Squ9F	Sequ0469BAC	A	A	H	H	A	A	H	H	A	A	H	H	A	A	A	H	A	A	H	H	A	H	H	H	A	H	H	A	H	A	A	H	H	H	H	A	H	H	H	H	H	H	H	H	A	A	A	A
Squ9F	Sequ0781BAC	A	A	H	H	A	A	H	H	A	A	H	H	A	A	A	H	A	A	H	H	A	H	H	H	A	H	H	A	H	A	A	H	H	H	H	A	H	H	H	H	H	H	H	H	H	A	A	A
Squ9F	Sequ0932TUF	A	A	H	H	A	A	H	H	H	A	H	H	A	A	A	H	A	A	H	H	A	H	H	H	A	H	H	A	H	A	A	A	H	H	H	A	H	H	H	H	H	H	H	H	H	A	A	A
Squ9F	Sequ0854TUF	A	A	H	H	A	A	H	H	H	A	H	H	A	A	A	H	A	A	H	H	A	H	H	H	A	H	H	A	H	A	A	A	H	H	H	A	H	H	H	H	H	H	H	H	H	A	A	A
Squ9F	Sequ0727TUF	A	A	H	H	A	A	H	H	H	A	H	H	A	A	A	H	A	A	H	H	A	H	H	H	A	H	H	A	H	A	A	A	H	H	H	A	H	H	H	H	H	H	H	H	H	A	A	A
Squ9F	Sequ0806TUF	A	A	H	H	A	A	H	H	H	A	H	H	A	A	A	H	A	A	H	H	A	H	H	H	A	H	H	A	H	A	A	A	H	H	H	A	H	H	H	H	H	H	H	H	H	A	A	H
Squ9F	Sequ0142TUF	A	A	H	H	A	A	H	H	H	A	H	H	A	A	A	H	A	A	H	H	A	H	H	H	A	H	H	A	H	A	A	A	H	H	H	A	H	A	H	H	H	H	H	H	H	A	A	H
Squ9F	Sequ0417TUF	A	A	H	H	A	A	H	H	H	A	H	H	A	A	A	H	A	A	H	H	A	H	H	H	A	H	H	A	H	A	A	A	H	H	H	A	H	A	H	H	H	H	H	H	H	A	A	H
Squ9F	Sequ1470BAC	A	A	H	H	A	A	H	H	H	A	H	H	A	A	A	H	A	A	H	H	A	H	H	H	A	H	H	A	H	A	A	A	H	H	H	A	H	A	H	H	H	H	H	H	H	A	A	H
Squ9F	Sequ04343SNP	A	A	H	H	A	A	H	H	H	A	H	H	A	A	A	H	A	A	H	H	A	H	H	H	A	H	H	A	H	A	A	A	H	H	H	A	H	A	H	H	H	H	H	H	H	A	A	H
Squ9F	Sequ0070TUF	A	A	H	H	A	A	H	H	H	A	H	H	A	A	A	H	A	A	H	H	A	H	H	H	A	H	H	A	H	A	A	A	H	H	H	A	H	A	H	H	H	A	H	H	H	A	A	H
Squ9F	Sequ0072TUF	A	A	H	H	A	A	H	H	H	A	H	H	A	A	A	H	A	A	H	H	A	H	H	H	A	H	H	A	H	A	A	A	H	H	H	A	H	A	H	H	H	A	H	H	H	A	A	H
Squ9F	Sequ0112TUF	A	A	H	H	A	A	H	H	H	A	H	H	A	A	A	H	A	A	H	H	A	H	H	H	A	H	H	A	H	A	A	A	H	H	H	A	H	A	H	H	H	A	H	H	H	A	A	H
Squ9F	Sequ0505TUF	A	A	H	H	A	A	H	H	H	A	H	H	A	A	A	H	A	A	H	H	A	H	H	H	A	H	H	A	H	A	A	A	H	H	H	A	H	A	H	H	H	A	H	H	H	A	A	H
Squ9F	Sequ0576TUF	A	A	H	H	A	A	H	H	H	A	H	H	A	A	A	H	A	A	H	H	A	H	H	H	A	H	H	A	H	A	A	A	H	H	H	A	H	A	H	H	H	A	H	H	H	A	A	H
Squ9F	Sequ0590TUF	A	A	H	H	A	A	H	H	H	A	H	H	A	A	A	H	A	A	H	H	A	H	H	H	A	H	H	A	H	A	A	A	H	H	H	A	H	A	H	H	H	A	H	H	H	A	A	H
Squ9F	Sequ0673TUF	A	A	H	H	A	A	H	H	H	A	H	H	A	A	A	H	A	A	H	H	A	H	H	H	A	H	H	A	H	A	A	A	H	H	H	A	H	A	H	H	H	A	H	H	H	A	A	H
Squ9F	Sequ0711TUF	A	A	H	H	A	A	H	H	H	A	H	H	A	A	A	H	A	A	H	H	A	H	H	H	A	H	H	A	H	A	A	A	H	H	H	A	H	A	H	H	H	A	H	H	H	A	A	H
Squ9F	Sequ0772TUF	A	A	H	H	A	A	H	H	H	A	H	H	A	A	A	H	A	A	H	H	A	H	H	H	A	H	H	A	H	A	A	A	H	H	H	A	H	A	H	H	H	A	H	H	H	A	A	H
Squ9F	Sequ0891TUF	A	A	H	H	A	A	H	H	H	A	H	H	A	A	A	H	A	A	H	H	A	H	H	H	A	H	H	A	H	A	A	A	H	H	H	A	H	A	H	H	H	A	H	H	H	A	A	H
Squ9F	Sequ1006TUF	A	A	H	H	A	A	H	H	H	A	H	H	A	A	A	H	A	A	H	H	A	H	H	H	A	H	H	A	H	A	A	A	H	H	H	A	H	A	H	H	H	A	H	H	H	A	A	H
Squ9F	Sequ1046TUF	A	A	H	H	A	A	H	H	H	A	H	H	A	A	A	H	A	A	H	H	A	H	H	H	A	H	H	A	H	A	A	A	H	H	H	A	H	A	H	H	H	A	H	H	H	A	A	H
Squ9F	Sequ0128BAC	A	A	H	H	A	A	H	H	H	A	H	H	A	A	A	H	A	A	H	H	A	H	H	H	A	H	H	A	H	A	A	A	H	H	H	A	H	A	H	H	H	A	H	H	H	A	A	H
Squ9F	Sequ0261BAC	A	A	H	H	A	A	H	H	H	A	H	H	A	A	A	H	A	A	H	H	A	H	H	H	A	H	H	A	H	A	A	A	H	H	H	A	H	A	H	H	H	A	H	H	H	A	A	H
Squ9F	Sequ0374BAC	A	A	H	H	A	A	H	H	H	A	H	H	A	A	A	H	A	A	H	H	A	H	H	H	A	H	H	A	H	A	A	A	H	H	H	A	H	A	H	H	H	A	H	H	H	A	A	H
Squ9F	Sequ0556BAC	A	A	H	H	A	A	H	H	H	A	H	H	A	A	A	H	A	A	H	H	A	H	H	H	A	H	H	A	H	A	A	A	H	H	H	A	H	A	H	H	H	A	H	H	H	A	A	H
Squ9F	Sequ0850BAC	A	A	H	H	A	A	H	H	H	A	H	H	A	A	A	H	A	A	H	H	A	H	H	H	A	H	H	A	H	A	A	A	H	H	H	A	H	A	H	H	H	A	H	H	H	A	A	H
Squ9F	Sequ1079BAC	A	A	H	H	A	A	H	H	H	A	H	H	A	A	A	H	A	A	H	H	A	H	H	H	A	H	H	A	H	A	A	A	H	H	H	A	H	A	H	H	H	A	H	H	H	A	A	H
Squ9F	Sequ1349BAC	A	A	H	H	A	A	H	H	H	A	H	H	A	A	A	H	A	A	H	H	A	H	H	H	A	H	H	A	H	A	A	A	H	H	H	A	H	A	H	H	H	A	H	H	H	A	A	H
Squ9F	Sequ1804BAC	A	A	H	H	A	A	H	H	H	A	H	H	A	A	A	H	A	A	H	H	A	H	H	H	A	H	H	A	H	A	A	A	H	H	H	A	H	A	H	H	H	A	H	H	H	A	A	H
Squ9F	Sequ1869BAC	A	A	H	H	A	A	H	H	H	A	H	H	A	A	A	H	A	A	H	H	A	H	H	H	A	H	H	A	H	A	A	A	H	H	H	A	H	A	H	H	H	A	H	H	H	A	A	H
Squ9F	Sequ1910BAC	A	A	H	H	A	A	H	H	H	A	H	H	A	A	A	H	A	A	H	H	A	H	H	H	A	H	H	A	H	A	A	A	H	H	H	A	H	A	H	H	H	A	H	H	H	A	A	H
Squ9F	Sequ2504BAC	A	A	H	H	A	A	H	H	H	A	H	H	A	A	A	H	A	A	H	H	A	H	H	H	A	H	H	A	H	A	A	A	H	H	H	A	H	A	H	H	H	A	H	H	H	A	A	H
Squ9F	Sequ2559BAC	A	A	H	H	A	A	H	H	H	A	H	H	A	A	A	H	A	A	H	H	A	H	H	H	A	H	H	A	H	A	A	A	H	H	H	A	H	A	H	H	H	A	H	H	H	A	A	H
Squ9F	Sequ2917BAC	A	A	H	H	A	A	H	H	H	A	H	H	A	A	A	H	A	A	H	H	A	H	H	H	A	H	H	A	H	A	A	A	H	H	H	A	H	A	H	H	H	A	H	H	H	A	A	H
Squ9F	Sequ3122BAC	A	A	H	H	A	A	H	H	H	A	H	H	A	A	A	H	A	A	H	H	A	H	H	H	A	H	H	A	H	A	A	A	H	H	H	A	H	A	H	H	H	A	H	H	H	A	A	H
Squ9F	Sequ02834SNP	A	A	H	H	A	A	H	H	H	A	H	H	A	A	A	H	A	A	H	H	A	H	H	H	A	H	H	A	H	A	A	A	H	H	H	A	H	A	H	H	H	A	H	H	H	A	A	H
Squ9F	Sequ01215SNP	A	A	H	H	A	A	H	H	H	A	H	H	A	A	A	H	A	A	H	H	A	H	H	H	A	H	H	A	H	A	A	A	H	H	H	A	H	A	H	H	H	A	H	H	H	A	A	H
Squ9F	Sequ0187TUF	A	A	H	H	A	A	H	H	H	A	H	H	A	A	A	H	A	A	H	H	A	A	H	H	A	H	H	H	H	A	A	A	H	H	H	A	H	A	H	H	H	A	H	H	H	A	A	H
Squ9F	Sequ0947TUF	A	A	H	H	A	A	H	H	H	A	H	H	A	A	A	H	A	A	H	H	A	A	H	H	A	H	H	H	H	A	A	A	H	H	H	A	H	A	H	H	H	A	H	H	H	A	A	H
Squ10F	Sequ0675BAC	H	A	A	A	H	A	H	H	A	H	A	H	H	H	H	A	A	H	A	H	A	H	A	A	H	H	H	H	A	H	H	H	A	A	A	H	H	A	A	H	H	H	A	A	A	A	A	A
Squ10F	Sequ1427BAC	H	A	A	A	A	A	A	H	A	H	A	H	H	H	H	A	A	H	A	H	A	A	A	A	H	H	H	H	A	H	H	H	A	H	A	H	H	A	A	H	H	H	A	A	A	A	A	A
Squ10F	Sequ1056TUF	H	A	A	A	A	H	A	H	A	H	A	A	H	H	H	A	A	H	A	H	A	A	H	A	H	A	H	H	A	H	H	A	A	H	A	A	H	A	H	H	H	H	A	H	A	A	A	A
Squ10F	Sequ0915TUF	H	A	A	A	A	H	A	H	A	H	A	A	H	H	H	A	A	H	A	H	A	A	H	A	A	A	A	H	A	H	H	A	A	H	A	A	H	A	H	H	H	H	A	H	H	A	A	A
Squ10F	Sequ0754BTUF	H	A	A	A	A	H	A	H	A	H	A	A	H	H	H	A	A	H	A	H	A	A	H	A	A	A	A	H	A	H	H	A	A	H	A	A	H	A	H	H	H	H	A	H	H	A	A	A
Squ10F	Sequ0059TUF	H	A	A	A	A	H	A	H	A	H	A	A	H	H	H	A	A	H	A	H	A	A	H	A	A	A	A	H	A	H	H	A	A	H	H	A	H	A	H	H	H	H	A	H	H	A	A	A
Squ10F	Sequ0119TUF	H	A	A	A	A	H	A	H	A	H	A	A	H	H	H	A	A	H	A	H	A	A	H	A	A	A	A	H	A	H	H	A	A	H	H	A	H	A	H	H	H	H	A	H	H	A	A	A
Squ10F	Sequ0165TUF	H	A	A	A	A	H	A	H	A	H	A	A	H	H	H	A	A	H	A	H	A	A	H	A	A	A	A	H	A	H	H	A	A	H	H	A	H	A	H	H	H	H	A	H	H	A	A	A
Squ10F	Sequ0235TUF	H	A	A	A	A	H	A	H	A	H	A	A	H	H	H	A	A	H	A	H	A	A	H	A	A	A	A	H	A	H	H	A	A	H	H	A	H	A	H	H	H	H	A	H	H	A	A	A
Squ10F	Sequ0311TUF	H	A	A	A	A	H	A	H	A	H	A	A	H	H	H	A	A	H	A	H	A	A	H	A	A	A	A	H	A	H	H	A	A	H	H	A	H	A	H	H	H	H	A	H	H	A	A	A
Squ10F	Sequ0452TUF	H	A	A	A	A	H	A	H	A	H	A	A	H	H	H	A	A	H	A	H	A	A	H	A	A	A	A	H	A	H	H	A	A	H	H	A	H	A	H	H	H	H	A	H	H	A	A	A
Squ10F	Sequ0521TUF	H	A	A	A	A	H	A	H	A	H	A	A	H	H	H	A	A	H	A	H	A	A	H	A	A	A	A	H	A	H	H	A	A	H	H	A	H	A	H	H	H	H	A	H	H	A	A	A
Squ10F	Sequ0523TUF	H	A	A	A	A	H	A	H	A	H	A	A	H	H	H	A	A	H	A	H	A	A	H	A	A	A	A	H	A	H	H	A	A	H	H	A	H	A	H	H	H	H	A	H	H	A	A	A
Squ10F	Sequ0602TUF	H	A	A	A	A	H	A	H	A	H	A	A	H	H	H	A	A	H	A	H	A	A	H	A	A	A	A	H	A	H	H	A	A	H	H	A	H	A	H	H	H	H	A	H	H	A	A	A
Squ10F	Sequ0611TUF	H	A	A	A	A	H	A	H	A	H	A	A	H	H	H	A	A	H	A	H	A	A	H	A	A	A	A	H	A	H	H	A	A	H	H	A	H	A	H	H	H	H	A	H	H	A	A	A
Squ10F	Sequ0761TUF	H	A	A	A	A	H	A	H	A	H	A	A	H	H	H	A	A	H	A	H	A	A	H	A	A	A	A	H	A	H	H	A	A	H	H	A	H	A	H	H	H	H	A	H	H	A	A	A
Squ10F	Sequ0768TUF	H	A	A	A	A	H	A	H	A	H	A	A	H	H	H	A	A	H	A	H	A	A	H	A	A	A	A	H	A	H	H	A	A	H	H	A	H	A	H	H	H	H	A	H	H	A	A	A
Squ10F	Sequ0791TUF	H	A	A	A	A	H	A	H	A	H	A	A	H	H	H	A	A	H	A	H	A	A	H	A	A	A	A	H	A	H	H	A	A	H	H	A	H	A	H	H	H	H	A	H	H	A	A	A
Squ10F	Sequ0835TUF	H	A	A	A	A	H	A	H	A	H	A	A	H	H	H	A	A	H	A	H	A	A	H	A	A	A	A	H	A	H	H	A	A	H	H	A	H	A	H	H	H	H	A	H	H	A	A	A
Squ10F	Sequ0882TUF	H	A	A	A	A	H	A	H	A	H	A	A	H	H	H	A	A	H	A	H	A	A	H	A	A	A	A	H	A	H	H	A	A	H	H	A	H	A	H	H	H	H	A	H	H	A	A	A
Squ10F	Sequ0922TUF	H	A	A	A	A	H	A	H	A	H	A	A	H	H	H	A	A	H	A	H	A	A	H	A	A	A	A	H	A	H	H	A	A	H	H	A	H	A	H	H	H	H	A	H	H	A	A	A
Squ10F	Sequ0944TUF	H	A	A	A	A	H	A	H	A	H	A	A	H	H	H	A	A	H	A	H	A	A	H	A	A	A	A	H	A	H	H	A	A	H	H	A	H	A	H	H	H	H	A	H	H	A	A	A
Squ10F	Sequ0199BAC	H	A	A	A	A	H	A	H	A	H	A	A	H	H	H	A	A	H	A	H	A	A	H	A	A	A	A	H	A	H	H	A	A	H	H	A	H	A	H	H	H	H	A	H	H	A	A	A
Squ10F	Sequ0542BAC	H	A	A	A	A	H	A	H	A	H	A	A	H	H	H	A	A	H	A	H	A	A	H	A	A	A	A	H	A	H	H	A	A	H	H	A	H	A	H	H	H	H	A	H	H	A	A	A
Squ10F	Sequ0648BAC	H	A	A	A	A	H	A	H	A	H	A	A	H	H	H	A	A	H	A	H	A	A	H	A	A	A	A	H	A	H	H	A	A	H	H	A	H	A	H	H	H	H	A	H	H	A	A	A
Squ10F	Sequ0840BAC	H	A	A	A	A	H	A	H	A	H	A	A	H	H	H	A	A	H	A	H	A	A	H	A	A	A	A	H	A	H	H	A	A	H	H	A	H	A	H	H	H	H	A	H	H	A	A	A
Squ10F	Sequ0974BAC	H	A	A	A	A	H	A	H	A	H	A	A	H	H	H	A	A	H	A	H	A	A	H	A	A	A	A	H	A	H	H	A	A	H	H	A	H	A	H	H	H	H	A	H	H	A	A	A
Squ10F	Sequ1047BAC	H	A	A	A	A	H	A	H	A	H	A	A	H	H	H	A	A	H	A	H	A	A	H	A	A	A	A	H	A	H	H	A	A	H	H	A	H	A	H	H	H	H	A	H	H	A	A	A
Squ10F	Sequ1227BAC	H	A	A	A	A	H	A	H	A	H	A	A	H	H	H	A	A	H	A	H	A	A	H	A	A	A	A	H	A	H	H	A	A	H	H	A	H	A	H	H	H	H	A	H	H	A	A	A
Squ10F	Sequ1876BAC	H	A	A	A	A	H	A	H	A	H	A	A	H	H	H	A	A	H	A	H	A	A	H	A	A	A	A	H	A	H	H	A	A	H	H	A	H	A	H	H	H	H	A	H	H	A	A	A
Squ10F	Sequ1885BAC	H	A	A	A	A	H	A	H	A	H	A	A	H	H	H	A	A	H	A	H	A	A	H	A	A	A	A	H	A	H	H	A	A	H	H	A	H	A	H	H	H	H	A	H	H	A	A	A
Squ10F	Sequ2296BAC	H	A	A	A	A	H	A	H	A	H	A	A	H	H	H	A	A	H	A	H	A	A	H	A	A	A	A	H	A	H	H	A	A	H	H	A	H	A	H	H	H	H	A	H	H	A	A	A
Squ10F	Sequ3009BAC	H	A	A	A	A	H	A	H	A	H	A	A	H	H	H	A	A	H	A	H	A	A	H	A	A	A	A	H	A	H	H	A	A	H	H	A	H	A	H	H	H	H	A	H	H	A	A	A
Squ10F	Sequ02187SNP	H	A	A	A	A	H	A	H	A	H	A	A	H	H	H	A	A	H	A	H	A	A	H	A	A	A	A	H	A	H	H	A	A	H	H	A	H	A	H	H	H	H	A	H	H	A	A	A
Squ10F	Sequ02797SNP	H	A	A	A	A	H	A	H	A	H	A	A	H	H	H	A	A	H	A	H	A	A	H	A	A	A	A	H	A	H	H	A	A	H	H	A	H	A	H	H	H	H	A	H	H	A	A	A
Squ10F	Sequ2159BAC	A	A	A	A	A	H	A	H	A	H	A	A	H	H	H	A	A	H	A	H	A	A	H	A	A	A	A	H	A	H	H	A	A	H	H	A	H	A	H	H	H	H	A	H	H	A	A	A
Squ10F	Sequ2587BAC	A	A	A	A	A	H	A	H	A	H	A	A	H	H	H	A	A	H	A	H	A	A	H	A	A	A	A	H	A	H	H	A	A	H	H	A	H	A	H	H	H	H	A	H	H	A	A	A
Squ10F	Sequ0819BAC	A	H	A	A	A	H	A	H	A	H	A	A	A	A	H	A	A	H	A	H	A	A	H	A	A	A	A	H	A	A	H	A	A	H	H	A	H	A	H	H	H	H	A	H	H	A	A	A
Squ10F	Sequ01546SNP	A	-	A	A	A	H	A	H	A	H	A	A	A	A	H	A	A	H	A	H	A	A	H	A	A	A	A	H	A	A	H	A	A	H	H	A	H	A	H	H	H	H	A	H	H	A	A	A
Squ10F	Sequ0577TUF	H	H	H	H	H	H	H	H	A	H	A	A	H	H	H	A	H	H	H	H	A	H	H	A	A	A	A	H	A	H	H	A	A	H	H	A	H	A	H	H	H	H	A	H	H	A	A	A
Squ11F	Sequ0047TUF	H	A	A	H	A	A	A	H	H	A	A	A	A	A	A	A	H	A	A	A	A	A	A	H	H	H	A	A	H	H	A	A	H	A	H	H	H	A	H	A	H	A	H	A	H	A	A	H
Squ11F	Sequ0108TUF	H	A	A	H	A	A	A	H	H	A	A	A	A	A	A	A	H	A	A	A	A	A	A	H	H	H	A	A	H	H	A	A	H	A	H	H	H	A	H	A	H	A	H	A	H	A	A	H
Squ11F	Sequ0132TUF	H	A	A	H	A	A	A	H	H	A	A	A	A	A	A	A	H	A	A	A	A	A	A	H	H	H	A	A	H	H	A	A	H	A	H	H	H	A	H	A	H	A	H	A	H	A	A	H
Squ11F	Sequ0436TUF	H	A	A	H	A	A	A	H	H	A	A	A	A	A	A	A	H	A	A	A	A	A	A	H	H	H	A	A	H	H	A	A	H	A	H	H	H	A	H	A	H	A	H	A	H	A	A	H
Squ11F	Sequ0588TUF	H	A	A	H	A	A	A	H	H	A	A	A	A	A	A	A	H	A	A	A	A	A	A	H	H	H	A	A	H	H	A	A	H	A	H	H	H	A	H	A	H	A	H	A	H	A	A	H
Squ11F	Sequ0974TUF	H	A	A	H	A	A	A	H	H	A	A	A	A	A	A	A	H	A	A	A	A	A	A	H	H	H	A	A	H	H	A	A	H	A	H	H	H	A	H	A	H	A	H	A	H	A	A	H
Squ11F	Sequ1036TUF	H	A	A	H	A	A	A	H	H	A	A	A	A	A	A	A	H	A	A	A	A	A	A	H	H	H	A	A	H	H	A	A	H	A	H	H	H	A	H	A	H	A	H	A	H	A	A	H
Squ11F	Sequ0968BAC	H	A	A	H	A	A	A	H	H	A	A	A	A	A	A	A	H	A	A	A	A	A	A	H	H	H	A	A	H	H	A	A	H	A	H	H	H	A	H	A	H	A	H	A	H	A	A	H
Squ11F	Sequ1325BAC	H	A	A	H	A	A	A	H	H	A	A	A	A	A	A	A	H	A	A	A	A	A	A	H	H	H	A	A	H	H	A	A	H	A	H	H	H	A	H	A	H	A	H	A	H	A	A	H
Squ11F	Sequ2895BAC	H	A	A	H	A	A	A	H	H	A	A	A	A	A	A	A	H	A	A	A	A	A	A	H	H	H	A	A	H	H	A	A	H	A	H	H	H	A	H	A	H	A	H	A	H	A	A	H
Squ12F	Sequ0328TUF	A	H	H	H	A	H	A	A	A	A	A	H	A	H	H	H	A	H	H	H	H	H	H	A	H	H	A	A	A	A	A	A	H	A	A	H	H	H	A	H	A	A	A	H	H	A	H	H
Squ12F	Sequ0230TUF	A	H	H	H	A	H	A	A	A	A	A	H	A	H	H	H	A	H	H	H	H	H	H	A	H	H	A	A	A	A	A	A	H	A	A	H	H	H	A	H	A	A	A	H	H	A	H	H
Squ12F	Sequ0544TUF	A	H	H	H	A	H	A	A	A	A	A	H	A	H	H	H	A	H	H	H	H	H	H	A	H	H	A	A	A	A	A	A	H	A	A	H	H	H	A	H	A	A	A	H	H	A	H	H
Squ12F	Sequ0861TUF	A	H	H	H	A	H	A	A	A	A	A	H	A	H	H	H	A	H	H	H	H	H	H	A	H	H	A	A	A	A	A	A	H	A	A	H	H	H	A	H	A	A	A	H	H	A	H	H
Squ12F	Sequ1015TUF	A	H	H	H	A	H	A	A	A	A	A	H	A	H	H	H	A	H	H	H	H	H	H	A	H	H	A	A	A	A	A	A	H	A	A	H	H	H	A	H	A	A	A	H	H	A	H	H
Squ12F	Sequ3151BAC	A	H	H	H	A	H	A	A	A	A	A	H	A	H	H	H	A	H	H	H	H	H	H	A	H	H	A	A	A	A	A	A	H	A	A	H	H	H	A	H	A	A	A	H	H	A	H	H
Squ12F	Sequ00138SNP	A	H	H	H	A	H	A	A	A	A	A	H	A	H	H	H	A	H	H	H	H	H	H	A	H	H	A	A	A	A	A	A	H	A	A	H	H	H	A	H	A	A	A	H	H	A	H	H
Squ12F	Sequ00752SNP	A	H	H	H	A	H	A	A	A	A	A	H	A	H	H	H	A	H	H	H	H	H	H	A	H	H	A	A	A	A	A	A	H	A	A	H	H	H	A	H	A	A	A	H	H	A	H	H
Squ12F	Sequ00766SNP	A	H	H	H	A	H	A	A	A	A	A	H	A	H	H	H	A	H	H	H	H	H	H	A	H	H	A	A	A	A	A	A	H	A	A	H	H	H	A	H	A	A	A	H	H	A	H	H
Squ12F	Sequ01484SNP	A	H	H	H	A	H	A	A	A	A	A	H	A	-	-	H	A	H	H	H	H	-	H	A	H	H	A	A	A	A	A	A	H	A	A	H	H	H	A	H	A	A	A	H	H	A	H	H
Squ12F	Sequ0021TUF	A	H	H	H	A	H	A	A	A	A	A	H	A	H	H	H	A	H	H	H	H	H	H	A	H	H	A	A	A	A	A	A	H	A	A	H	H	H	A	H	A	A	A	H	H	A	H	H
Squ12F	Sequ0776TUF	A	H	H	H	A	H	A	A	A	A	A	H	A	H	H	H	A	H	H	H	H	H	H	A	H	H	A	A	A	A	A	A	H	A	A	H	H	H	A	H	A	A	A	H	H	A	H	H
Squ12F	Sequ0782TUF	A	H	H	H	A	H	A	A	A	A	A	H	A	H	H	H	A	H	H	H	H	H	H	A	H	H	A	A	A	A	A	A	H	A	A	H	H	H	A	H	A	A	A	H	H	A	H	H
Squ12F	Sequ0845TUF	A	H	H	H	A	H	A	A	A	A	A	H	A	H	H	H	A	H	H	H	H	H	H	A	H	H	A	A	A	A	A	A	H	A	A	H	H	H	A	H	A	A	A	H	H	A	H	H
Squ12F	Sequ0900TUF	A	H	H	H	A	H	A	A	A	A	A	H	A	H	H	H	A	H	H	H	H	H	H	A	H	H	A	A	A	A	A	A	H	A	A	H	H	H	A	H	A	A	A	H	H	A	H	H
Squ12F	Sequ2379BAC	A	H	H	H	A	H	A	A	A	A	A	H	A	H	H	H	A	H	H	H	H	H	H	A	H	H	A	A	A	A	A	A	H	A	A	H	H	H	A	H	A	A	A	H	H	A	H	H
Squ12F	Sequ0793TUF	A	H	H	H	H	H	A	A	A	A	A	H	A	H	H	H	A	H	H	H	H	H	H	A	H	H	A	A	A	A	A	A	H	A	A	H	H	H	A	H	A	A	A	H	H	A	H	H
Squ12F	Sequ0362BAC	A	H	H	H	H	H	A	A	A	A	A	H	A	H	H	H	A	H	H	H	H	H	H	A	H	H	A	A	A	A	A	A	H	A	A	H	H	H	A	H	A	A	A	H	H	A	H	H
Squ12F	Sequ0485BAC	A	H	H	H	H	H	A	A	A	A	A	H	A	H	H	H	A	H	H	H	H	H	H	A	H	H	A	A	A	A	A	A	H	A	A	H	H	H	A	H	A	A	A	H	H	A	H	H
Squ12F	Sequ2384BAC	A	H	H	H	H	H	A	A	A	A	A	H	A	H	H	H	A	H	H	H	H	H	H	A	H	H	A	A	A	A	A	A	H	A	A	H	H	H	A	H	A	A	A	H	H	A	H	H
Squ12F	Sequ0645TUF	A	H	A	H	H	H	A	A	A	A	A	H	A	H	H	H	A	H	H	H	H	H	H	A	H	H	A	A	A	A	A	A	H	A	A	H	H	H	A	H	A	A	A	H	H	A	H	H
Squ12F	Sequ1001TUF	A	H	A	H	H	H	A	A	A	A	A	H	A	H	H	H	A	H	H	H	H	H	H	A	H	H	A	A	A	A	A	A	H	A	A	H	H	H	A	H	A	A	A	H	H	A	H	H
Squ12F	Sequ0320TUF	A	H	A	H	H	H	A	A	A	A	A	H	A	H	H	H	A	H	H	H	H	H	H	A	H	H	H	A	A	A	A	A	H	A	A	H	H	H	A	H	A	A	A	H	H	A	H	H
Squ12F	Sequ2501BAC	A	H	A	H	H	H	A	A	A	A	A	H	A	H	H	H	A	H	H	H	H	H	H	A	H	H	H	A	A	A	A	A	H	A	A	H	H	H	A	H	A	A	A	H	H	A	H	H
Squ12F	Sequ0017TUF	A	H	A	H	H	H	A	A	A	A	A	H	A	H	H	H	A	H	H	H	A	H	H	A	H	H	H	A	A	A	A	A	H	A	A	H	H	H	A	H	A	A	A	H	H	A	H	H
Squ12F	Sequ03384SNP	A	H	A	H	H	H	A	A	A	A	A	H	A	H	H	H	A	H	H	H	A	H	H	A	H	H	H	H	A	H	A	A	H	A	A	A	H	A	A	H	A	A	A	H	H	-	H	H
Squ12F	Sequ1881BAC	A	H	A	H	H	H	A	A	A	A	A	H	A	H	H	H	A	H	H	H	A	H	H	A	H	H	H	H	A	H	A	A	H	A	A	A	H	A	A	H	A	A	A	H	H	A	H	H
Squ12F	Sequ0212TUF	A	H	A	H	H	H	A	A	A	A	A	H	A	H	H	H	A	H	H	H	A	H	H	A	H	H	H	H	A	H	A	A	H	A	A	A	H	A	A	H	A	A	A	H	H	A	H	H
Squ12F	Sequ0589TUF	A	H	A	H	H	H	A	A	A	H	A	H	A	H	H	H	A	H	H	H	A	H	H	A	H	H	H	H	A	H	A	A	H	A	A	A	H	A	A	H	A	A	A	H	H	A	A	H
Squ12F	Sequ2511BAC	A	H	A	H	H	H	A	A	A	H	A	H	A	H	H	A	A	H	H	A	A	H	H	A	H	H	H	H	A	H	A	A	H	A	A	A	H	A	A	H	A	A	H	H	H	A	A	H
Squ12F	Sequ1002TUF	A	H	A	H	H	H	A	A	A	H	H	H	A	H	H	A	A	H	H	A	A	H	H	A	H	H	H	H	A	H	A	A	H	A	A	A	H	A	A	H	A	A	H	H	H	H	A	H
Squ12F	Sequ0301TUF	A	H	A	H	H	H	A	A	A	H	H	H	A	H	H	A	A	H	H	A	A	H	H	A	H	H	H	H	A	H	A	A	H	A	A	A	H	A	A	H	A	A	H	H	H	H	A	H
Squ12F	Sequ04211SNP	A	H	A	A	H	H	A	A	H	H	H	H	A	H	H	A	A	H	A	A	A	H	A	A	H	H	H	H	A	H	A	A	H	H	A	A	H	A	A	A	A	A	H	H	A	H	A	H
Squ13F	Sequ0317TUF	H	A	A	A	H	H	H	H	A	H	A	A	A	H	H	A	A	A	H	A	A	A	A	A	A	H	H	H	A	A	A	A	H	H	H	H	A	A	A	A	A	H	H	H	H	H	A	A
Squ13F	Sequ0184TUF	H	A	A	A	H	H	H	H	A	H	A	A	A	H	H	A	A	A	H	A	A	A	A	A	A	H	H	H	A	A	A	A	H	H	H	H	A	A	A	H	A	H	H	H	H	H	A	A
Squ13F	Sequ0936TUF	H	A	A	A	H	H	H	H	A	H	A	A	A	H	H	A	A	A	H	A	A	A	A	A	A	H	H	H	A	A	A	A	H	H	H	H	A	A	A	H	A	H	H	H	H	H	A	A
Squ13F	Sequ2200BAC	H	A	A	A	H	H	H	H	A	H	A	A	A	H	H	A	A	A	H	A	A	A	A	A	A	H	H	H	A	A	A	A	H	H	H	H	A	A	A	H	A	H	H	H	H	H	A	A
Squ13F	Sequ0280BAC	H	A	A	A	H	H	H	H	A	A	A	A	A	H	H	A	A	A	H	A	A	A	A	A	A	H	H	H	A	A	A	A	H	H	H	H	A	A	A	H	A	H	H	H	H	H	A	A
Squ13F	Sequ0834TUF	H	A	H	A	H	H	H	H	A	A	A	A	A	H	H	A	A	A	H	A	A	A	A	A	A	H	H	H	A	A	A	A	H	H	H	H	A	A	A	H	A	H	H	H	H	H	A	A
Squ13F	Sequ0201TUF	H	A	H	A	H	H	H	H	A	A	A	A	A	H	H	A	A	A	H	A	A	A	A	A	A	H	H	H	A	A	A	A	H	H	H	H	A	A	A	H	A	H	H	H	H	H	A	A
Squ13F	Sequ0205TUF	H	A	H	A	H	H	H	H	A	A	A	A	A	H	H	A	A	A	H	A	A	A	A	A	A	H	H	H	A	A	A	A	H	H	H	H	A	A	A	H	A	H	H	H	H	H	A	A
Squ13F	Sequ0536TUF	H	A	H	A	H	H	H	H	A	A	A	A	A	H	H	A	A	A	H	A	A	A	A	A	A	H	H	H	A	A	A	A	H	H	H	H	A	A	A	H	A	H	H	H	H	H	A	A
Squ13F	Sequ0774TUF	H	A	H	A	H	H	H	H	A	A	A	A	A	H	H	A	A	A	H	A	A	A	A	A	A	H	H	H	A	A	A	A	H	H	H	H	A	A	A	H	A	H	H	H	H	H	A	A
Squ13F	Sequ0799TUF	H	A	H	A	H	H	H	H	A	A	A	A	A	H	H	A	A	A	H	A	A	A	A	A	A	H	H	H	A	A	A	A	H	H	H	H	A	A	A	H	A	H	H	H	H	H	A	A
Squ13F	Sequ1007TUF	H	A	H	A	H	H	H	H	A	A	A	A	A	H	H	A	A	A	H	A	A	A	A	A	A	H	H	H	A	A	A	A	H	H	H	H	A	A	A	H	A	H	H	H	H	H	A	A
Squ13F	Sequ1052TUF	H	A	H	A	H	H	H	H	A	A	A	A	A	H	H	A	A	A	H	A	A	A	A	A	A	H	H	H	A	A	A	A	H	H	H	H	A	A	A	H	A	H	H	H	H	H	A	A
Squ13F	Sequ0189BAC	H	A	H	A	H	H	H	H	A	A	A	A	A	H	H	A	A	A	H	A	A	A	A	A	A	H	H	H	A	A	A	A	H	H	H	H	A	A	A	H	A	H	H	H	H	H	A	A
Squ13F	Sequ0700BAC	H	A	H	A	H	H	H	H	A	A	A	A	A	H	H	A	A	A	H	A	A	A	A	A	A	H	H	H	A	A	A	A	H	H	H	H	A	A	A	H	A	H	H	H	H	H	A	A
Squ13F	Sequ0837BAC	H	A	H	A	H	H	H	H	A	A	A	A	A	H	H	A	A	A	H	A	A	A	A	A	A	H	H	H	A	A	A	A	H	H	H	H	A	A	A	H	A	H	H	H	H	H	A	A
Squ13F	Sequ2130BAC	H	A	H	A	H	H	H	H	A	A	A	A	A	H	H	A	A	A	H	A	A	A	A	A	A	H	H	H	A	A	A	A	H	H	H	H	A	A	A	H	A	H	H	H	H	H	A	A
Squ13F	Sequ2821BAC	H	A	H	A	H	H	H	H	A	A	A	A	A	H	H	A	A	A	H	A	A	A	A	A	A	H	H	H	A	A	A	A	H	H	H	H	A	A	A	H	A	H	H	H	H	H	A	A
Squ13F	Sequ2851BAC	H	A	H	A	H	H	H	H	A	A	A	A	A	H	H	A	A	A	H	A	A	A	A	A	A	H	H	H	A	A	A	A	H	H	H	H	A	A	A	H	A	H	H	H	H	H	A	A
Squ13F	Sequ2861BAC	H	A	H	A	H	H	H	H	A	A	A	A	A	H	H	A	A	A	H	A	A	A	A	A	A	H	H	H	A	A	A	A	H	H	H	H	A	A	A	H	A	H	H	H	H	H	A	A
Squ13F	Sequ0144TUF	H	A	H	A	H	H	A	H	A	A	A	A	A	H	H	A	A	A	H	A	A	A	A	A	A	H	H	H	A	A	A	A	H	H	H	H	A	A	A	H	A	H	H	H	H	H	A	A
Squ13F	Sequ0717TUF	H	A	H	A	H	H	A	H	A	A	A	A	A	H	H	A	H	A	H	A	A	A	A	A	A	H	H	H	A	A	A	A	H	H	H	H	A	A	A	H	A	H	H	H	H	H	A	A
Squ13F	Sequ0966TUF	H	A	H	A	H	H	A	H	A	A	A	A	A	H	H	A	H	A	H	A	A	A	A	A	A	H	H	H	A	A	A	A	H	H	H	H	A	A	A	H	A	H	H	A	H	H	A	A
Squ13F	Sequ2737BAC	H	A	H	A	H	H	A	H	A	A	A	A	A	H	H	A	H	A	H	A	A	A	A	A	A	H	H	H	A	A	A	A	H	H	H	H	A	A	A	H	A	H	H	A	H	H	A	A
Squ13F	Sequ1055TUF	A	A	H	A	H	H	A	H	A	A	A	A	A	H	H	A	H	A	H	A	A	A	A	A	A	H	H	H	A	A	A	A	H	H	H	H	A	A	A	H	H	H	H	A	H	A	A	A
Squ14F	Sequ0056TUF	H	H	A	H	H	H	A	A	A	A	H	A	H	H	H	H	H	A	H	A	H	H	A	A	A	A	H	H	H	A	H	A	H	A	A	H	A	A	A	H	H	H	A	A	A	A	A	H
Squ14F	Sequ0077TUF	H	H	A	H	H	H	A	A	A	A	H	A	H	H	H	H	H	A	H	A	H	H	A	A	A	A	H	H	H	A	H	A	H	A	A	H	A	A	A	H	H	H	A	A	A	A	A	H
Squ14F	Sequ0559TUF	H	H	A	H	H	H	A	A	A	A	H	A	H	H	H	H	H	A	H	A	H	H	A	A	A	A	H	H	H	A	H	A	H	A	A	H	A	A	A	H	H	H	A	A	A	A	A	H
Squ14F	Sequ0775TUF	H	H	A	H	H	H	A	A	A	A	H	A	H	H	H	H	H	A	H	A	H	H	A	A	A	A	H	H	H	A	H	A	H	A	A	H	A	A	A	H	H	H	A	A	A	A	A	H
Squ14F	Sequ0789TUF	H	H	A	H	H	H	A	A	A	A	H	A	H	H	H	H	H	A	H	A	H	H	A	A	A	A	H	H	H	A	H	A	H	A	A	H	A	A	A	H	H	H	A	A	A	A	A	H
Squ14F	Sequ0840TUF	H	H	A	H	H	H	A	A	A	A	H	A	H	H	H	H	H	A	H	A	H	H	A	A	A	A	H	H	H	A	H	A	H	A	A	H	A	A	A	H	H	H	A	A	A	A	A	H
Squ14F	Sequ0913TUF	H	H	A	H	H	H	A	A	A	A	H	A	H	H	H	H	H	A	H	A	H	H	A	A	A	A	H	H	H	A	H	A	H	A	A	H	A	A	A	H	H	H	A	A	A	A	A	H
Squ14F	Sequ0937TUF	H	H	A	H	H	H	A	A	A	A	H	A	H	H	H	H	H	A	H	A	H	H	A	A	A	A	H	H	H	A	H	A	H	A	A	H	A	A	A	H	H	H	A	A	A	A	A	H
Squ14F	Sequ0933BAC	H	H	A	H	H	H	A	A	A	A	H	A	H	H	H	H	H	A	H	A	H	H	A	A	A	A	H	H	H	A	H	A	H	A	A	H	A	A	A	H	H	H	A	A	A	A	A	H
Squ14F	Sequ1117BAC	H	H	A	H	H	H	A	A	A	A	H	A	H	H	H	H	H	A	H	A	H	H	A	A	A	A	H	H	H	A	H	A	H	A	A	H	A	A	A	H	H	H	A	A	A	A	A	H
Squ14F	Sequ3069BAC	H	H	A	H	H	H	A	A	A	A	H	A	H	H	H	H	H	A	H	A	H	H	A	A	A	A	H	H	H	A	H	A	H	A	A	H	A	A	A	H	H	H	A	A	A	A	A	H
Squ14F	Sequ3275BAC	H	H	A	H	H	H	A	A	A	A	H	A	H	H	H	H	H	A	H	A	H	H	A	A	A	A	H	H	H	A	H	A	H	A	A	H	A	A	A	H	H	H	A	A	A	A	A	H
Squ14F	Sequ04887SNP	H	H	A	-	-	H	A	A	A	A	H	A	H	H	H	H	H	A	H	A	H	H	A	A	A	A	H	H	H	A	H	A	H	A	A	H	A	A	A	H	H	H	A	A	A	A	A	H
Squ14F	Sequ0616BAC	H	H	A	H	H	H	A	A	A	A	H	A	H	H	H	H	H	A	H	A	H	H	A	A	A	A	H	H	H	A	H	A	H	A	A	H	A	A	H	H	H	H	A	A	A	A	A	H
Squ14F	Sequ0013TUF	H	H	A	H	H	H	A	A	A	A	H	A	H	H	H	H	H	A	H	A	H	H	A	A	A	A	H	H	H	A	H	A	H	A	A	H	A	A	H	H	H	H	A	A	A	A	A	H
Squ14F	Sequ0035TUF	H	H	A	H	H	H	A	A	A	A	H	A	H	H	H	H	H	A	H	A	H	H	A	A	A	A	H	H	H	A	H	A	H	A	A	H	A	A	H	H	H	H	A	A	A	A	A	H
Squ14F	Sequ0568TUF	H	H	A	H	H	H	A	A	A	A	H	A	H	H	H	H	H	A	H	A	H	H	A	A	A	A	H	H	H	A	H	A	H	A	A	H	A	A	H	H	H	H	A	A	A	A	A	H
Squ14F	Sequ0632TUF	H	H	A	H	H	H	A	A	A	A	H	A	H	H	H	H	H	A	H	A	H	H	A	A	A	A	H	H	H	A	H	A	H	A	A	H	A	A	H	H	H	H	A	A	A	A	A	H
Squ14F	Sequ0682TUF	H	H	A	H	H	H	A	A	A	A	H	A	H	H	H	H	H	A	H	A	H	H	A	A	A	A	H	H	H	A	H	A	H	A	A	H	A	A	H	H	H	H	A	A	A	A	A	H
Squ14F	Sequ0855TUF	H	H	A	H	H	H	A	A	A	A	H	A	H	H	H	H	H	A	H	A	H	H	A	A	A	A	H	H	H	A	H	A	H	A	A	H	A	A	H	H	H	H	A	A	A	A	A	H
Squ14F	Sequ1021BAC	H	H	A	H	H	H	A	A	A	A	H	A	H	H	H	H	H	A	H	A	H	H	A	A	A	A	H	H	H	A	H	A	H	A	A	H	A	A	H	H	H	H	A	A	A	A	A	H
Squ14F	Sequ2220BAC	H	H	A	H	H	H	A	A	A	A	H	A	H	H	H	H	H	A	H	A	H	H	A	A	A	A	H	H	H	A	H	A	H	A	A	H	A	A	H	H	H	H	A	A	A	A	A	H
Squ14F	Sequ3271BAC	H	H	A	H	H	H	A	A	A	A	H	A	H	H	H	H	H	A	H	A	H	H	A	A	A	A	H	H	H	A	H	A	H	A	A	H	A	A	H	H	H	H	A	A	A	A	A	H
Squ14F	Sequ0539TUF	H	H	A	H	H	H	A	A	A	A	H	A	H	H	H	H	H	A	H	A	A	H	A	A	A	A	H	H	H	A	H	A	H	A	A	H	A	A	H	H	H	H	A	A	A	A	A	H
Squ14F	Sequ0579TUF	H	H	A	H	H	H	A	A	A	A	H	A	H	H	H	H	H	A	H	A	A	H	A	A	A	A	H	H	H	A	H	A	H	A	A	H	A	A	H	H	H	H	A	A	A	A	A	H
Squ14F	Sequ0636TUF	H	H	A	H	H	H	A	A	A	A	H	A	H	H	H	H	H	A	H	A	A	H	A	A	A	A	H	H	H	A	H	A	H	A	A	H	A	A	H	H	H	H	A	A	A	A	A	H
Squ14F	Sequ0842TUF	H	H	A	H	H	H	A	A	A	A	H	A	H	H	H	H	H	A	H	A	A	H	A	A	A	A	H	H	H	A	H	A	H	A	A	H	A	A	H	H	H	H	A	A	A	A	A	H
Squ14F	Sequ0624TUF	H	H	A	H	H	H	A	A	A	A	H	A	H	H	H	H	H	A	H	A	A	H	A	A	A	H	H	H	H	A	H	A	H	A	A	A	A	A	H	H	H	H	A	A	A	A	A	H
Squ14F	Sequ0897TUF	H	H	A	H	H	H	A	A	A	A	H	A	H	H	H	H	H	A	H	A	A	H	A	A	A	H	H	H	H	A	H	A	H	A	A	A	A	A	H	H	H	H	A	A	A	A	A	H
Squ14F	Sequ0013BAC	H	H	A	H	H	H	A	A	A	A	H	A	H	H	H	H	H	A	H	A	A	H	A	A	A	H	H	H	H	A	H	A	H	A	A	A	A	A	H	H	H	H	A	A	A	A	A	H
Squ14F	Sequ1660BAC	H	H	A	H	H	H	A	A	A	A	H	A	H	H	H	H	H	A	H	A	A	H	A	A	A	H	H	H	H	A	H	A	H	A	A	A	A	A	H	H	H	H	A	A	A	A	A	H
Squ14F	Sequ2466BAC	H	H	A	H	H	H	A	A	A	A	H	A	H	H	H	H	H	A	H	A	A	H	A	A	A	H	H	H	H	A	H	A	H	A	A	A	A	A	H	H	H	H	A	A	A	A	A	H
Squ14F	Sequ02102SNP	H	H	A	H	H	H	A	A	A	A	H	A	H	H	H	H	H	A	H	A	A	H	A	A	A	H	H	H	H	A	H	A	H	A	A	A	A	A	H	H	H	H	A	A	A	A	A	H
Squ14F	Sequ2221BAC	H	H	A	H	A	H	A	A	A	A	H	A	H	H	H	H	H	A	H	A	A	H	A	A	A	H	H	H	A	A	H	A	H	A	A	A	A	A	A	H	H	H	A	A	A	A	A	H
Squ14F	Sequ0591TUF	H	H	A	H	A	H	A	A	A	A	H	A	H	H	A	H	H	A	H	A	H	H	A	A	A	H	A	H	A	A	H	A	H	A	A	A	A	A	A	H	H	H	A	A	H	H	A	H
Squ14BF	Sequ1892BAC	H	A	A	H	A	H	A	A	H	H	H	H	H	H	A	H	A	A	A	A	H	H	A	A	H	H	A	H	A	A	H	H	H	H	A	A	A	A	A	H	H	H	A	A	H	H	A	H
Squ14BF	Sequ2887BAC	H	A	A	H	A	H	A	A	H	H	H	H	H	H	A	H	A	A	A	A	H	H	A	A	H	H	A	H	A	A	H	H	H	H	A	A	A	A	A	H	H	H	A	A	H	H	A	A
Squ15F	Sequ0042TUF	H	A	H	H	H	H	H	H	H	H	H	A	A	A	H	A	A	A	A	A	A	A	H	A	H	H	A	H	H	H	A	A	H	H	A	H	H	A	H	A	H	A	A	A	A	H	A	H
Squ15F	Sequ0455TUF	H	A	H	H	H	H	H	H	H	H	H	A	A	A	H	A	A	A	A	A	A	A	H	A	H	H	A	H	H	H	A	A	H	H	A	H	H	A	H	A	H	A	A	A	A	H	A	H
Squ15F	Sequ0654TUF	H	A	H	H	H	H	H	H	H	H	H	A	A	A	H	A	A	A	A	A	A	A	H	A	H	H	A	H	H	H	A	A	H	H	A	H	H	A	H	A	H	A	A	A	A	H	A	H
Squ15F	Sequ0811TUF	H	A	H	H	H	H	H	H	H	H	H	A	A	A	H	A	A	A	A	A	A	A	H	A	H	H	A	H	H	H	A	A	H	H	A	H	H	A	H	A	H	A	A	A	A	H	A	H
Squ15F	Sequ0885TUF	H	A	H	H	H	H	H	H	H	H	H	A	A	A	H	A	A	A	A	A	A	A	H	A	H	H	A	H	H	H	A	A	H	H	A	H	H	A	H	A	H	A	A	A	A	H	A	H
Squ15F	Sequ02612SNP	H	A	H	H	H	H	H	H	H	H	H	A	A	A	H	A	A	A	A	A	A	A	H	A	H	H	A	H	H	H	A	A	H	H	A	H	H	A	H	A	H	A	A	A	A	H	A	H
Squ15F	Sequ02728SNP	H	A	H	H	H	H	H	H	H	H	H	A	A	A	H	A	A	A	A	A	A	A	H	A	H	H	A	H	H	H	A	A	H	H	A	H	H	A	H	A	-	A	A	A	A	H	A	H
Squ15F	Sequ04122_1SNP	H	A	H	H	H	H	H	H	H	H	H	A	A	A	H	A	A	A	A	A	A	A	H	A	H	H	A	H	H	H	A	A	H	H	A	H	H	A	H	A	H	A	A	A	A	H	A	H
Squ15F	Sequ0260TUF	H	A	H	H	A	H	H	A	H	H	H	A	A	A	H	A	A	A	A	A	A	A	H	A	H	H	A	H	H	H	A	A	H	H	A	H	H	A	H	A	H	A	A	A	A	H	A	H
Squ15F	Sequ0838TUF	H	A	H	H	A	H	H	A	H	H	H	A	A	A	H	A	A	A	A	A	A	A	H	A	H	H	H	H	H	H	A	A	H	H	A	H	H	A	H	A	H	A	A	A	A	H	A	H
Squ15F	Sequ1453BAC	H	A	H	H	A	H	H	A	H	H	H	A	A	A	H	A	A	A	A	A	A	A	H	A	H	H	H	H	H	H	A	A	H	A	A	H	H	A	H	A	H	A	A	A	A	H	A	H
Squ15F	Sequ0156TUF	H	A	H	H	A	H	H	A	H	H	H	A	A	A	H	A	A	A	A	A	A	A	H	A	H	H	H	H	H	H	A	A	H	A	A	H	H	A	H	A	H	A	A	A	A	H	A	H
Squ15F	Sequ0958TUF	H	A	H	H	A	H	H	A	H	H	H	A	A	A	H	A	A	H	A	A	A	A	H	A	H	H	H	H	H	H	A	A	H	A	A	H	H	A	H	A	H	A	A	A	A	H	A	H
Squ15F	Sequ1983BAC	H	A	H	H	A	H	H	A	H	H	H	A	A	A	H	A	A	H	A	A	A	A	H	A	H	H	H	H	H	H	A	A	H	A	A	H	H	A	H	A	H	A	A	A	A	H	A	H
Squ15F	Sequ0107TUF	H	A	H	H	A	H	H	A	H	H	H	A	H	A	H	A	A	H	A	A	A	A	H	A	H	H	H	H	H	H	A	A	H	A	A	H	H	A	H	A	H	A	A	A	A	H	A	H
Squ15F	Sequ0115TUF	H	A	H	H	A	H	H	A	H	H	H	A	H	A	H	A	A	H	A	A	A	A	H	A	H	H	H	H	H	H	A	A	H	A	A	H	H	A	H	A	H	A	A	A	A	H	A	H
Squ15F	Sequ0224TUF	H	A	H	H	A	H	H	A	H	H	H	A	H	A	H	A	A	H	A	A	A	A	H	A	H	H	H	H	H	H	A	A	H	A	A	H	H	A	H	A	H	A	A	A	A	H	A	H
Squ15F	Sequ0226BTUF	H	A	H	H	A	H	H	A	H	H	H	A	H	A	H	A	A	H	A	A	A	A	H	A	H	H	H	H	H	H	A	A	H	A	A	H	H	A	H	A	H	A	A	A	A	H	A	H
Squ15F	Sequ0714TUF	H	A	H	H	A	H	H	A	H	H	H	A	H	A	H	A	A	H	A	A	A	A	H	A	H	H	H	H	H	H	A	A	H	A	A	H	H	A	H	A	H	A	A	A	A	H	A	H
Squ15F	Sequ0971TUF	H	A	H	H	A	H	H	A	H	H	H	A	H	A	H	A	A	H	A	A	A	A	H	A	H	H	H	H	H	H	A	A	H	A	A	H	H	A	H	A	H	A	A	A	A	H	A	H
Squ15F	Sequ0978TUF	H	A	H	H	A	H	H	A	H	H	H	A	H	A	H	A	A	H	A	A	A	A	H	A	H	H	H	H	H	H	A	A	H	A	A	H	H	A	H	A	H	A	A	A	A	H	A	H
Squ15F	Sequ0872BAC	H	A	H	H	A	H	H	A	H	H	H	A	H	A	H	A	A	H	A	A	A	A	H	A	H	H	H	H	H	H	A	A	H	A	A	H	H	A	H	A	H	A	A	A	A	H	A	H
Squ15F	Sequ1071BAC	H	A	H	H	A	H	H	A	H	H	H	A	H	A	H	A	A	H	A	A	A	A	H	A	H	H	H	H	H	H	A	A	H	A	A	H	H	A	H	A	H	A	A	A	A	H	A	H
Squ15F	Sequ1153BAC	H	A	H	H	A	H	H	A	H	H	H	A	H	A	H	A	A	H	A	A	A	A	H	A	H	H	H	H	H	H	A	A	H	A	A	H	H	A	H	A	H	A	A	A	A	H	A	H
Squ15F	Sequ1462BAC	H	A	H	H	A	H	H	A	H	H	H	A	H	A	H	A	A	H	A	A	A	A	H	A	H	H	H	H	H	H	A	A	H	A	A	H	H	A	H	A	H	A	A	A	A	H	A	H
Squ15F	Sequ2049BAC	H	A	H	H	A	H	H	A	H	H	H	A	H	A	H	A	A	H	A	A	A	A	H	A	H	H	H	H	H	H	A	A	H	A	A	H	H	A	H	A	H	A	A	A	A	H	A	H
Squ15F	Sequ2332BAC	H	A	H	H	A	H	H	A	H	H	H	A	H	A	H	A	A	H	A	A	A	A	H	A	H	H	H	H	H	H	A	A	H	A	A	H	H	A	H	A	H	A	A	A	A	H	A	H
Squ15F	Sequ2560BAC	H	A	H	H	A	H	H	A	H	H	H	A	H	A	H	A	A	H	A	A	A	A	H	A	H	H	H	H	H	H	A	A	H	A	A	H	H	A	H	A	H	A	A	A	A	H	A	H
Squ15F	Sequ2605BAC	H	A	H	H	A	H	H	A	H	H	H	A	H	A	H	A	A	H	A	A	A	A	H	A	H	H	H	H	H	H	A	A	H	A	A	H	H	A	H	A	H	A	A	A	A	H	A	H
Squ15F	Sequ3322BAC	H	A	H	H	A	H	H	A	H	H	H	A	H	A	H	A	A	H	A	A	A	A	H	A	H	H	H	H	H	H	A	A	H	A	A	H	H	A	H	A	H	A	A	A	A	H	A	H
Squ15F	Sequ03312SNP	H	A	H	H	A	H	H	A	H	H	H	A	H	A	H	A	A	H	A	A	A	A	H	A	H	H	H	H	H	H	A	A	H	A	A	H	H	A	H	A	H	A	A	A	A	H	A	H
Squ15F	Sequ04529SNP	H	A	-	H	A	H	H	A	H	H	H	A	H	A	H	A	A	H	A	A	A	A	H	A	H	H	H	H	H	H	A	A	H	A	A	H	H	A	H	A	H	A	A	A	A	H	A	H
Squ15F	Sequ0951TUF	H	A	H	H	A	H	H	A	H	H	A	A	H	A	A	A	A	H	A	A	A	A	H	A	H	H	H	H	H	H	A	H	H	A	A	H	H	A	H	A	H	A	A	A	A	A	A	H
Squ15F	Sequ1066BAC	H	A	H	H	A	H	H	A	H	H	A	A	H	A	A	A	A	H	A	A	A	A	H	A	H	H	H	H	H	H	A	H	H	A	A	H	H	A	H	A	H	A	A	A	A	A	A	H
Squ15F	Sequ1326BAC	H	A	H	H	A	H	H	A	H	H	A	A	H	A	A	A	A	H	A	A	A	A	H	A	H	H	H	H	H	H	A	H	H	A	A	H	H	A	H	A	H	A	A	A	A	A	H	H
Squ15F	Sequ1038TUF	H	A	H	H	A	H	H	A	H	H	A	A	H	A	A	A	A	H	A	A	A	A	H	A	H	H	H	H	H	H	A	H	H	A	A	H	H	A	H	A	H	A	A	A	A	A	H	H
Squ15F	Sequ0443BAC	H	A	H	H	A	H	H	A	H	H	A	A	H	A	A	A	A	H	A	A	A	A	H	A	H	H	H	H	H	H	A	H	H	A	A	H	H	H	H	A	H	A	A	A	A	A	H	H
Squ15F	Sequ02241SNP	H	A	H	H	A	H	H	A	H	H	A	A	H	A	A	A	A	H	A	A	A	A	H	A	H	H	H	H	H	H	A	H	H	A	A	H	H	H	H	A	H	A	A	A	A	A	H	H
Squ15F	Sequ1786BAC	H	A	H	H	A	H	H	A	H	H	A	A	H	A	A	A	A	H	A	A	A	A	H	A	H	H	H	H	H	H	A	H	H	A	A	H	H	H	H	A	H	A	A	A	A	A	H	H
Squ15F	Sequ1240BAC	H	A	H	H	A	H	H	A	H	H	A	A	H	A	A	A	A	H	A	A	A	A	H	A	H	H	H	H	A	H	A	H	H	A	A	H	H	H	H	A	H	A	A	A	A	A	H	H
Squ15F	Sequ0766BAC	H	A	H	H	A	H	H	A	A	A	A	A	H	A	A	A	A	H	A	A	A	H	H	H	A	H	H	H	A	A	A	H	H	A	A	H	H	H	H	A	A	A	H	A	H	A	H	A
Squ16F	Sequ0038TUF	H	H	H	H	H	H	A	H	H	A	A	A	H	H	A	H	H	A	H	A	H	H	A	A	H	H	H	H	A	H	H	H	H	H	A	A	H	A	A	H	A	A	A	A	A	A	A	H
Squ16F	Sequ0723TUF	H	H	H	H	H	H	A	H	H	A	A	A	H	H	A	H	H	A	H	A	H	H	A	A	H	H	H	H	A	H	H	H	H	H	A	A	H	A	A	H	A	A	A	A	A	A	A	H
Squ16F	Sequ0890TUF	H	H	H	H	H	H	A	H	H	A	A	A	H	H	A	H	H	A	H	A	H	H	A	A	H	H	H	H	A	H	H	H	H	H	A	A	H	A	A	H	A	A	A	A	A	A	A	H
Squ16F	Sequ0699BAC	H	H	H	H	H	H	A	H	H	A	A	A	H	H	A	H	H	A	H	A	H	H	A	A	H	H	H	H	A	H	H	H	H	H	A	A	H	A	A	H	A	A	A	A	A	A	A	H
Squ16F	Sequ1376BAC	H	H	H	H	H	H	A	H	H	A	A	A	H	H	A	H	H	A	H	A	H	H	A	A	H	H	H	H	A	H	H	H	H	H	A	A	H	A	A	H	A	A	A	A	A	A	A	H
Squ16F	Sequ0643TUF	H	H	H	H	H	H	A	H	H	A	A	A	H	H	A	H	H	A	H	A	H	H	A	A	H	H	H	H	A	H	H	H	H	H	A	A	H	A	A	H	A	H	A	A	A	A	A	H
Squ16F	Sequ0831TUF	H	H	H	H	H	H	A	H	H	A	A	A	H	H	A	H	H	A	H	A	H	H	A	A	H	H	H	H	A	H	H	H	H	H	A	A	H	A	A	H	A	H	A	A	A	A	A	H
Squ16F	Sequ0952TUF	H	H	H	H	H	H	A	H	H	A	A	A	H	H	A	H	H	A	H	A	H	H	A	A	H	H	H	H	A	H	H	H	H	H	A	A	H	A	A	H	A	H	A	A	A	A	A	H
Squ16F	Sequ1014TUF	H	H	H	H	H	H	A	H	H	A	A	A	H	H	A	H	H	A	H	A	H	H	A	A	H	H	H	H	A	H	H	H	H	H	A	A	H	A	A	H	A	H	A	A	A	A	A	H
Squ16F	Sequ0106BAC	H	H	H	H	H	H	A	H	H	A	A	A	H	H	A	H	H	A	H	A	H	H	A	A	H	H	H	H	A	H	H	H	H	H	A	A	H	A	A	H	A	H	A	A	A	A	A	H
Squ16F	Sequ0989BAC	H	H	H	H	H	H	A	H	H	A	A	A	H	H	A	H	H	A	H	A	H	H	A	A	H	H	H	H	A	H	H	H	H	H	A	A	H	A	A	H	A	H	A	A	A	A	A	H
Squ16F	Sequ01844SNP	H	H	H	H	H	H	A	H	H	A	A	A	H	A	A	H	H	A	H	A	H	H	A	A	H	H	H	H	A	H	H	H	H	H	A	A	H	A	A	H	A	H	A	A	A	A	A	H
Squ16F	Sequ0018TUF	H	H	H	H	H	H	A	H	H	A	A	A	H	A	A	H	H	A	H	A	H	H	A	A	H	H	H	H	A	H	H	H	H	H	A	A	H	A	A	H	A	H	A	A	A	A	H	H
Squ16F	Sequ0139TUF	H	H	H	H	H	H	A	H	H	A	A	A	H	A	A	H	H	A	H	A	H	H	A	A	H	H	H	H	A	H	H	H	H	H	A	A	H	A	A	H	A	H	A	A	A	A	H	H
Squ16F	Sequ0318TUF	H	H	H	H	H	H	A	H	H	A	A	A	H	A	A	H	H	A	H	A	H	H	A	A	H	H	H	H	A	H	H	H	H	H	A	A	H	A	A	H	A	H	A	A	A	A	H	H
Squ16F	Sequ0868TUF	H	H	H	H	H	H	A	H	H	A	A	A	H	A	A	H	H	A	H	A	H	H	A	A	H	H	H	H	A	H	H	H	H	H	A	A	H	A	A	H	A	H	A	A	A	A	H	H
Squ16F	Sequ0871TUF	H	H	H	H	H	H	A	H	H	A	A	A	H	A	A	H	H	A	H	A	H	H	A	A	H	H	H	H	A	H	H	H	H	H	A	A	H	A	A	H	A	H	A	A	A	A	H	H
Squ16F	Sequ0907TUF	H	H	H	H	H	H	A	H	H	A	A	A	H	A	A	H	H	A	H	A	H	H	A	A	H	H	H	H	A	H	H	H	H	H	A	A	H	A	A	H	A	H	A	A	A	A	H	H
Squ16F	Sequ1076BAC	H	H	H	H	H	H	A	H	H	A	A	A	H	A	A	H	H	A	H	A	H	H	A	A	H	H	H	H	A	H	H	H	H	H	A	A	H	A	A	H	A	H	A	A	A	A	H	H
Squ16F	Sequ01121SNP	H	H	H	H	H	H	A	H	H	A	A	A	H	A	A	H	H	A	H	A	H	H	A	-	H	H	H	H	A	H	H	H	H	H	A	A	H	A	A	H	A	H	A	A	A	A	H	H
Squ16F	Sequ0969TUF	H	H	H	H	H	H	A	H	H	A	A	A	H	A	A	H	H	A	H	A	H	H	A	A	H	H	H	H	A	H	H	H	H	H	A	A	H	A	A	H	A	H	A	A	A	H	H	H
Squ16F	Sequ0195TUF	H	H	H	H	H	H	A	A	H	A	A	A	H	A	A	H	H	A	H	A	H	H	A	A	H	H	H	H	A	H	H	H	H	H	A	A	H	A	A	H	A	H	A	A	A	H	H	H
Squ16F	Sequ0196TUF	H	H	H	H	H	H	A	A	H	A	A	A	H	A	A	H	H	A	H	A	H	H	A	A	H	H	H	H	A	H	H	H	H	H	A	A	H	A	A	H	A	H	A	A	A	H	H	H
Squ16F	Sequ3238BAC	H	H	H	H	H	H	A	A	H	A	A	A	H	A	A	H	H	A	H	A	H	H	A	A	H	H	H	H	A	H	H	H	H	H	A	A	H	A	A	H	A	H	A	A	A	H	H	H
Squ16F	Sequ01745SNP	H	-	H	H	H	H	A	-	H	A	A	A	H	A	A	H	H	A	H	A	H	-	A	A	H	H	H	H	A	H	H	H	H	H	A	A	H	A	A	H	A	H	A	A	A	-	H	H
Squ16F	Sequ0562TUF	H	H	H	H	H	H	A	A	H	A	A	A	H	A	A	H	A	A	H	A	H	H	A	A	H	H	H	H	A	H	H	H	H	H	A	A	H	H	A	H	A	H	A	A	A	H	H	H
Squ16F	Sequ0647TUF	H	H	H	H	H	H	A	A	H	H	A	A	H	A	H	H	A	A	H	H	H	H	A	A	H	H	H	H	H	A	A	H	H	H	A	A	H	H	H	H	A	H	A	A	A	H	A	H
Squ16F	Sequ3028BAC	H	H	H	H	H	H	A	A	H	H	A	A	H	A	H	H	A	A	H	H	H	H	A	A	H	H	H	H	H	A	A	H	H	H	A	A	H	H	H	H	A	H	A	A	A	H	A	H
Squ17F	Sequ0457TUF	H	A	A	A	H	H	A	A	A	H	H	A	A	H	H	A	A	H	A	A	H	A	H	A	A	A	A	A	A	A	H	H	A	H	A	H	H	H	H	H	H	A	H	H	A	H	A	A
Squ17F	Sequ1016TUF	H	A	A	A	H	H	A	A	A	H	H	A	A	H	H	A	A	H	A	A	H	A	H	A	A	A	A	A	A	A	H	H	A	H	A	H	H	H	H	H	H	A	H	H	A	H	A	A
Squ17F	Sequ1193BAC	H	A	A	A	H	H	A	A	A	H	H	A	A	H	H	A	A	H	A	A	H	A	H	A	A	A	A	A	A	A	H	H	A	H	A	H	H	H	H	H	H	A	H	H	A	H	A	A
Squ17F	Sequ0025TUF	H	A	A	A	H	H	A	A	A	H	H	A	A	H	H	A	A	H	A	A	H	A	H	A	A	A	A	A	A	A	H	H	A	H	A	H	H	H	H	H	H	A	H	H	A	H	A	A
Squ17F	Sequ0955TUF	H	A	A	A	H	H	A	A	A	H	H	A	A	H	H	A	A	H	A	A	H	A	H	A	A	A	A	A	A	A	H	H	A	H	A	H	H	H	H	H	H	A	H	H	A	H	A	A
Squ17F	Sequ0895TUF	H	A	A	A	H	H	A	A	A	H	H	A	A	H	H	A	A	H	A	A	H	A	H	A	A	A	A	A	A	A	H	H	A	H	A	H	H	H	H	H	H	A	H	H	A	H	A	A
Squ17F	Sequ0228TUF	H	A	A	A	H	H	A	A	A	H	H	A	A	H	H	A	A	H	A	A	H	A	H	A	A	A	A	A	A	A	H	H	A	H	A	H	H	H	H	A	H	A	H	H	A	H	A	A
Squ17F	Sequ0116TUF	H	A	A	A	H	H	A	A	A	H	H	A	A	H	H	A	A	H	A	A	H	A	H	A	A	A	A	A	A	A	H	H	A	H	A	H	H	H	H	A	H	A	H	H	A	H	A	H
Squ17F	Sequ1060TUF	H	A	A	A	H	H	A	A	A	H	H	A	A	H	H	A	A	H	A	A	H	A	H	A	A	A	A	A	A	A	H	H	A	H	A	H	H	H	H	A	H	A	H	H	A	H	A	H
Squ17F	Sequ1155BAC	H	A	A	A	H	H	A	A	A	H	H	A	A	H	H	A	A	H	A	A	H	A	H	A	A	A	A	A	A	A	H	H	A	H	A	H	H	H	H	A	H	A	H	H	A	H	A	H
Squ17F	Sequ2219BAC	H	A	A	A	H	H	A	A	A	H	H	A	A	H	H	A	A	H	A	A	H	A	H	A	A	A	A	A	A	A	H	H	A	H	A	H	H	H	H	A	H	A	H	H	A	H	A	H
Squ17F	Sequ3088BAC	H	A	A	A	H	H	A	A	A	H	H	A	A	H	H	A	A	H	A	A	H	A	H	A	A	A	A	A	A	A	H	H	A	H	A	H	H	H	H	A	H	A	H	H	A	H	A	H
Squ17F	Sequ0046TUF	H	A	A	A	H	H	A	A	A	H	H	A	A	H	H	A	A	H	A	A	H	A	H	A	A	A	A	A	A	A	H	H	A	H	A	H	H	A	H	A	H	A	H	H	A	H	A	H
Squ17F	Sequ0888BAC	H	A	A	A	H	H	A	A	A	H	H	A	A	H	H	A	A	H	A	A	H	A	H	A	A	A	A	A	A	A	H	H	A	H	A	H	H	A	H	A	H	A	H	H	A	H	A	H
Squ17F	Sequ1336BAC	H	A	A	A	H	H	A	A	A	H	H	A	A	H	H	A	A	H	A	A	H	A	H	A	A	A	A	A	A	A	H	H	A	H	A	H	H	A	H	A	H	A	H	H	A	H	A	H
Squ17F	Sequ1690BAC	H	A	A	A	H	H	A	A	A	H	H	A	A	H	H	A	A	H	A	A	H	A	H	A	A	A	A	A	A	A	H	H	A	H	A	H	H	A	H	A	H	A	H	H	A	H	A	H
Squ17F	Sequ02123SNP	H	A	A	A	H	H	A	A	A	H	H	A	A	H	H	A	A	H	A	A	H	A	H	A	A	A	A	A	A	A	H	H	A	H	A	-	H	A	H	A	H	A	H	H	A	H	A	H
Squ17F	Sequ01964SNP	H	A	A	H	H	H	A	A	A	H	H	H	A	H	H	A	A	H	A	A	H	A	H	A	A	A	A	A	A	A	H	H	A	H	A	H	H	A	H	A	H	A	H	H	A	H	A	H
Squ17F	Sequ0716TUF	H	A	A	H	H	H	H	A	A	H	H	H	A	H	H	A	A	H	A	A	H	A	H	A	A	H	A	A	A	A	A	H	A	H	A	H	H	A	H	A	H	A	H	H	A	H	A	H
Squ17F	Sequ2051BAC	H	A	A	H	H	H	H	A	A	H	H	H	A	H	A	A	A	H	A	A	H	A	H	A	A	H	A	A	A	A	A	H	A	H	A	H	H	A	H	A	H	A	H	H	A	H	A	H
Squ17F	Sequ0802TUF	H	A	A	H	H	H	H	A	A	H	H	H	A	H	A	A	H	H	A	A	H	H	H	A	A	H	A	A	A	H	A	H	A	H	A	H	H	A	H	A	H	H	A	H	A	H	A	H
Squ17F	Sequ2269BAC	H	A	A	H	H	H	H	A	A	H	H	H	A	H	A	A	H	H	A	A	H	H	H	A	A	H	A	A	A	H	A	H	A	H	A	H	H	A	H	A	H	H	A	H	A	H	A	H
Squ17F	Sequ2942BAC	H	H	A	H	H	H	H	A	A	H	H	H	A	H	A	A	H	A	A	A	H	H	H	A	A	H	A	A	A	H	A	H	A	H	A	H	H	A	A	A	H	H	A	H	A	H	A	H
Squ18F	Sequ0421TUF	H	A	A	A	H	A	A	A	A	A	H	A	H	A	H	A	H	H	A	A	H	A	A	A	A	H	A	H	H	A	A	A	A	A	H	H	H	A	H	A	H	H	H	A	H	A	A	H
Squ18F	Sequ0614TUF	H	A	A	A	H	A	A	A	A	A	H	A	H	A	H	A	H	H	A	A	H	A	A	A	A	H	A	H	H	A	A	A	A	A	H	H	H	A	H	A	H	H	H	A	H	A	A	H
Squ18F	Sequ0896TUF	H	A	A	A	H	A	A	A	A	A	H	A	H	A	H	A	H	H	A	A	H	A	A	A	A	H	A	H	H	A	A	A	A	A	H	H	H	A	H	A	H	H	H	A	H	A	A	H
Squ18F	Sequ0029TUF	H	A	A	A	H	A	A	A	A	A	H	A	H	A	H	A	H	H	A	A	A	A	A	A	A	H	A	H	H	A	A	A	A	A	H	H	H	A	H	A	H	H	H	A	H	A	A	H
Squ18F	Sequ0217TUF	H	A	A	A	H	A	A	A	A	A	H	A	H	A	H	A	H	H	A	A	A	A	A	A	A	H	A	H	H	A	A	A	A	A	H	H	H	A	H	A	H	H	H	A	H	A	A	H
Squ18F	Sequ0631TUF	H	A	A	A	H	A	A	A	A	A	H	A	H	A	H	A	H	H	A	A	A	A	A	A	A	H	A	H	H	A	A	A	A	A	H	H	H	A	H	A	H	H	H	A	H	A	A	H
Squ18F	Sequ0771TUF	H	A	A	A	H	A	A	A	A	A	H	A	H	A	H	A	H	H	A	A	A	A	A	A	A	H	A	H	H	A	A	A	A	A	H	H	H	A	H	A	H	H	H	A	H	A	A	H
Squ18F	Sequ0563BAC	H	A	A	A	H	A	A	A	A	A	H	A	H	A	H	A	H	H	A	A	A	A	A	A	A	H	A	H	H	A	A	A	A	A	H	H	H	A	H	A	H	H	H	A	H	A	A	H
Squ18F	Sequ1115BAC	H	A	A	A	H	A	A	A	A	A	H	A	H	A	H	A	H	H	A	A	A	A	A	A	A	H	A	H	H	A	A	A	A	A	H	H	H	A	H	A	H	H	H	A	H	A	A	H
Squ18F	Sequ1849BAC	H	A	A	A	H	A	A	A	A	A	H	A	H	A	H	A	H	H	A	A	A	A	A	A	A	H	A	H	H	A	A	A	A	A	H	H	H	A	H	A	H	H	H	A	H	A	A	H
Squ18F	Sequ2713BAC	H	A	A	A	H	A	A	A	A	A	H	A	H	A	H	A	H	H	A	A	A	A	A	A	A	H	A	H	H	A	A	A	A	A	H	H	H	A	H	A	H	H	H	A	H	A	A	H
Squ18F	Sequ3003BAC	H	A	A	A	H	A	A	A	A	A	H	A	H	A	H	A	H	H	A	A	A	A	A	A	A	H	A	H	H	A	A	A	A	A	H	H	H	A	H	A	H	H	H	A	H	A	A	H
Squ18F	Sequ3074BAC	H	A	A	A	H	A	A	A	A	A	H	A	H	A	H	A	H	H	A	A	A	A	A	A	A	H	A	H	H	A	A	A	A	A	H	H	H	A	H	A	H	H	H	A	H	A	A	H
Squ18F	Sequ3301BAC	H	A	A	A	H	A	A	A	A	A	H	A	H	A	H	A	H	H	A	A	A	A	A	A	A	H	A	H	H	A	A	A	A	A	H	H	H	A	H	A	H	H	H	A	H	A	A	H
Squ18F	Sequ0595TUF	H	A	A	A	H	A	A	A	A	A	H	A	H	A	H	A	H	H	A	A	A	A	A	A	A	H	A	H	H	A	A	A	A	A	H	H	H	A	H	A	H	H	H	A	H	A	A	H
Squ18F	Sequ0747TUF	H	A	A	A	H	A	A	A	A	A	H	A	H	A	H	A	H	H	A	A	A	A	A	A	A	H	A	H	H	A	A	A	A	A	H	H	H	A	H	A	H	H	H	A	H	A	A	H
Squ18F	Sequ0857TUF	H	A	A	A	H	A	A	A	A	A	H	A	H	A	H	A	H	H	A	A	A	A	A	A	A	H	A	H	H	A	A	A	A	A	H	H	H	A	H	A	H	H	H	A	H	A	A	H
Squ18F	Sequ0918TUF	H	A	A	A	H	A	A	A	A	A	H	A	H	A	H	A	H	H	A	A	A	A	A	A	A	H	A	H	H	A	A	A	A	A	H	H	H	A	H	A	H	H	H	A	H	A	A	H
Squ18F	Sequ0981TUF	H	A	A	A	H	A	A	A	A	A	H	A	H	A	H	A	H	H	A	A	A	A	A	A	A	H	A	H	H	A	A	A	A	A	H	H	H	A	H	A	H	H	H	A	H	A	A	H
Squ18F	Sequ0298BAC	H	A	A	A	H	A	A	A	A	A	H	A	H	A	H	A	H	H	A	A	A	A	A	A	A	H	A	H	H	A	A	A	A	A	H	H	H	A	H	A	H	H	H	A	H	A	A	H
Squ18F	Sequ0428BAC	H	A	A	A	H	A	A	A	A	A	H	A	H	A	H	A	H	H	A	A	A	A	A	A	A	H	A	H	H	A	A	A	A	A	H	H	H	A	H	A	H	H	H	A	H	A	A	H
Squ18F	Sequ0805BAC	H	A	A	A	H	A	A	A	A	A	H	A	H	A	H	A	H	H	A	A	A	A	A	A	A	H	A	H	H	A	A	A	A	A	H	H	H	A	H	A	H	H	H	A	H	A	A	H
Squ18F	Sequ1207BAC	H	A	A	A	H	A	A	A	A	A	H	A	H	A	H	A	H	H	A	A	A	A	A	A	A	H	A	H	H	A	A	A	A	A	H	H	H	A	H	A	H	H	H	A	H	A	A	H
Squ18F	Sequ1444BAC	H	A	A	A	H	A	A	A	A	A	H	A	H	A	H	A	H	H	A	A	A	A	A	A	A	H	A	H	H	A	A	A	A	A	H	H	H	A	H	A	H	H	H	A	H	A	A	H
Squ18F	Sequ2388BAC	H	A	A	A	H	A	A	A	A	A	H	A	H	A	H	A	H	H	A	A	A	A	A	A	A	H	A	H	H	A	A	A	A	A	H	H	H	A	H	A	H	H	H	A	H	A	A	H
Squ18F	Sequ2460BAC	H	A	A	A	H	A	A	A	A	A	H	A	H	A	H	A	H	H	A	A	A	A	A	A	A	H	A	H	H	A	A	A	A	A	H	H	H	A	H	A	H	H	H	A	H	A	A	H
Squ18F	Sequ3144BAC	H	A	A	A	H	A	A	A	A	A	H	A	H	A	H	A	H	H	A	A	A	A	A	A	A	H	A	H	H	A	A	A	A	A	H	H	H	A	H	A	H	H	H	A	H	A	A	H
Squ18F	Sequ04834SNP	H	A	A	A	H	A	A	A	A	A	H	A	H	A	H	A	H	H	A	A	A	A	A	A	A	H	A	H	H	A	A	A	A	A	H	H	H	A	H	A	H	H	H	A	H	A	A	H
Squ18F	Sequ0007TUF	H	A	A	A	A	A	A	A	A	A	H	A	H	A	H	A	H	H	A	A	A	A	A	A	A	H	A	H	H	A	A	A	A	A	H	H	H	A	H	A	H	H	H	A	H	A	A	H
Squ18F	Sequ0896BAC	H	A	A	A	A	A	A	A	A	A	H	A	H	A	H	A	H	H	A	A	A	A	A	A	A	H	A	H	H	A	A	A	A	A	H	H	H	A	H	A	H	H	H	A	H	A	A	H
Squ18F	Sequ0995TUF	H	A	A	A	A	A	A	A	A	A	H	A	H	A	H	A	H	H	H	A	A	A	A	A	A	H	A	H	H	A	A	A	A	A	H	H	H	A	H	A	H	H	H	A	H	A	A	H
Squ18F	Sequ0621TUF	H	A	A	A	A	A	A	A	A	A	H	A	H	A	H	A	H	H	H	A	A	A	A	A	A	H	A	H	H	A	A	A	A	A	H	H	H	A	A	A	H	H	H	A	H	A	A	H
Squ18F	Sequ1010TUF	H	A	A	A	A	A	A	A	A	A	H	A	H	A	H	A	H	H	H	A	A	A	A	A	A	H	A	H	H	A	A	A	A	A	H	H	H	A	A	A	H	H	H	A	H	A	A	H
Squ18F	Sequ0640TUF	H	A	A	A	A	A	A	A	A	A	H	A	H	A	H	A	H	H	H	A	A	A	A	A	A	H	A	H	H	A	A	A	A	H	A	H	H	A	A	A	H	H	H	H	H	H	A	A
Squ18F	Sequ2761BAC	H	H	A	H	A	A	A	A	A	A	H	A	H	A	H	A	H	H	H	A	A	A	H	A	A	H	A	H	H	A	A	A	A	H	A	H	H	A	A	A	H	H	A	H	H	H	A	A
Squ18F	Sequ2828BAC	H	H	A	H	A	A	A	A	H	A	H	A	H	A	H	A	H	H	H	A	A	H	H	A	A	H	A	H	A	H	H	A	A	H	A	H	H	A	A	A	H	H	A	H	A	H	A	A
Squ18F	Sequ02181SNP	-	H	A	H	A	-	A	A	H	A	H	A	H	A	H	A	H	H	H	A	A	H	H	A	H	H	H	H	A	-	H	A	-	H	A	H	H	A	A	A	H	-	A	H	A	H	H	A
Squ18F	Sequ0965TUF	H	H	A	H	A	A	A	A	H	A	H	A	H	A	H	A	H	H	H	A	A	H	H	A	H	H	H	H	A	H	H	A	A	H	A	H	H	A	A	A	H	H	A	H	A	H	H	A
Squ18F	Sequ0983TUF	H	H	A	H	A	A	A	A	H	A	H	A	H	A	H	A	H	H	H	A	A	H	H	A	H	H	H	H	A	H	H	A	A	H	A	H	H	A	A	A	H	H	A	H	A	H	H	A
Squ19F	Sequ0305TUF	A	H	A	A	A	H	H	H	H	H	A	H	H	H	H	H	H	H	A	H	H	A	A	A	A	H	H	A	A	H	A	A	A	A	A	H	A	H	H	A	H	A	A	H	A	H	A	H
Squ19F	Sequ2968BAC	H	H	A	A	H	H	H	H	H	A	A	A	A	H	H	H	A	A	A	H	H	A	A	H	A	H	H	A	A	H	A	A	A	A	A	H	A	H	H	A	H	A	H	H	A	H	A	H
Squ19F	Sequ0607BAC	H	H	H	A	H	H	H	H	H	A	A	A	A	H	H	H	A	A	A	H	H	A	A	H	A	H	H	A	A	H	A	A	A	A	A	H	A	H	H	A	A	A	H	H	A	H	A	H
Squ19F	Sequ0639TUF	H	H	H	A	H	H	H	H	H	A	A	A	A	H	H	H	A	A	A	H	H	A	A	H	A	H	H	A	A	H	A	A	A	H	A	H	A	H	A	A	A	A	H	H	A	H	A	H
Squ19F	Sequ02423SNP	H	H	H	A	H	H	H	H	H	-	A	A	A	H	H	H	A	A	A	H	H	A	A	H	A	H	H	A	A	H	A	A	A	H	A	H	A	H	A	H	A	A	H	H	A	H	A	H
Squ19F	Sequ0905TUF	H	H	H	A	H	H	H	H	H	A	A	A	A	H	H	H	A	A	A	H	H	A	A	H	A	H	H	A	A	H	A	A	A	H	A	H	A	H	A	H	A	A	H	H	A	H	A	H
Squ19F	Sequ0181TUF	H	H	H	A	H	H	H	H	H	A	A	A	A	H	H	H	A	A	A	H	H	A	A	H	A	H	H	A	A	A	A	A	A	H	A	H	A	A	A	H	A	A	H	H	H	H	A	H
Squ19F	Sequ0269TUF	H	H	H	A	H	H	H	H	H	A	A	A	A	H	H	H	A	A	A	H	H	A	A	H	A	H	H	A	A	A	A	A	A	H	A	H	A	A	A	H	A	A	H	H	H	H	A	H
Squ19F	Sequ0435TUF	H	H	H	A	H	H	H	H	H	A	A	A	A	H	H	H	A	A	A	H	H	A	A	H	A	H	H	A	A	A	A	A	A	H	A	H	A	A	A	H	A	A	H	H	H	H	A	H
Squ19F	Sequ0550TUF	H	H	H	A	H	H	H	H	H	A	A	A	A	H	H	H	A	A	A	H	H	A	A	H	A	H	H	A	A	A	A	A	A	H	A	H	A	A	A	H	A	A	H	H	H	H	A	H
Squ19F	Sequ0680TUF	H	H	H	A	H	H	H	H	H	A	A	A	A	H	H	H	A	A	A	H	H	A	A	H	A	H	H	A	A	A	A	A	A	H	A	H	A	A	A	H	A	A	H	H	H	H	A	H
Squ19F	Sequ0739TUF	H	H	H	A	H	H	H	H	H	A	A	A	A	H	H	H	A	A	A	H	H	A	A	H	A	H	H	A	A	A	A	A	A	H	A	H	A	A	A	H	A	A	H	H	H	H	A	H
Squ19F	Sequ0823TUF	H	H	H	A	H	H	H	H	H	A	A	A	A	H	H	H	A	A	A	H	H	A	A	H	A	H	H	A	A	A	A	A	A	H	A	H	A	A	A	H	A	A	H	H	H	H	A	H
Squ19F	Sequ0863TUF	H	H	H	A	H	H	H	H	H	A	A	A	A	H	H	H	A	A	A	H	H	A	A	H	A	H	H	A	A	A	A	A	A	H	A	H	A	A	A	H	A	A	H	H	H	H	A	H
Squ19F	Sequ0992TUF	H	H	H	A	H	H	H	H	H	A	A	A	A	H	H	H	A	A	A	H	H	A	A	H	A	H	H	A	A	A	A	A	A	H	A	H	A	A	A	H	A	A	H	H	H	H	A	H
Squ19F	Sequ0026BAC	H	H	H	A	H	H	H	H	H	A	A	A	A	H	H	H	A	A	A	H	H	A	A	H	A	H	H	A	A	A	A	A	A	H	A	H	A	A	A	H	A	A	H	H	H	H	A	H
Squ19F	Sequ0138BAC	H	H	H	A	H	H	H	H	H	A	A	A	A	H	H	H	A	A	A	H	H	A	A	H	A	H	H	A	A	A	A	A	A	H	A	H	A	A	A	H	A	A	H	H	H	H	A	H
Squ19F	Sequ0140BAC	H	H	H	A	H	H	H	H	H	A	A	A	A	H	H	H	A	A	A	H	H	A	A	H	A	H	H	A	A	A	A	A	A	H	A	H	A	A	A	H	A	A	H	H	H	H	A	H
Squ19F	Sequ1762BAC	H	H	H	A	H	H	H	H	H	A	A	A	A	H	H	H	A	A	A	H	H	A	A	H	A	H	H	A	A	A	A	A	A	H	A	H	A	A	A	H	A	A	H	H	H	H	A	H
Squ19F	Sequ1977BAC	H	H	H	A	H	H	H	H	H	A	A	A	A	H	H	H	A	A	A	H	H	A	A	H	A	H	H	A	A	A	A	A	A	H	A	H	A	A	A	H	A	A	H	H	H	H	A	H
Squ19F	Sequ2714BAC	H	H	H	A	H	H	H	H	H	A	A	A	A	H	H	H	A	A	A	H	H	A	A	H	A	H	H	A	A	A	A	A	A	H	A	H	A	A	A	H	A	A	H	H	H	H	A	H
Squ19F	Sequ2771BAC	H	H	H	A	H	H	H	H	H	A	A	A	A	H	H	H	A	A	A	H	H	A	A	H	A	H	H	A	A	A	A	A	A	H	A	H	A	A	A	H	A	A	H	H	H	H	A	H
Squ19F	Sequ2865BAC	H	H	H	A	H	H	H	H	H	A	A	A	A	H	H	H	A	A	A	H	H	A	A	H	A	H	H	A	A	A	A	A	A	H	A	H	A	A	A	H	A	A	H	H	H	H	A	H
Squ19F	Sequ01991SNP	H	H	H	A	H	H	H	H	H	A	A	A	A	H	H	H	A	A	A	H	H	A	A	H	A	H	H	A	A	A	A	A	A	H	A	H	A	A	A	H	A	A	H	H	H	H	A	H
Squ19F	Sequ03935SNP	H	H	H	A	H	H	H	H	H	A	A	A	A	H	H	H	A	A	A	H	H	A	A	H	A	H	H	A	A	A	A	A	A	H	A	H	A	A	A	H	A	A	H	H	H	H	A	H
Squ19F	Sequ01822SNP	-	H	H	A	H	-	H	H	H	A	A	A	A	H	H	H	A	A	A	H	H	A	A	H	A	H	H	A	A	A	A	A	A	H	A	H	A	A	A	H	A	A	H	H	H	H	A	H
Squ19F	Sequ0943TUF	H	H	H	A	H	H	H	H	H	A	A	A	A	H	H	H	A	A	A	H	H	A	A	H	A	H	H	H	A	A	A	A	A	H	A	H	A	A	A	H	A	A	H	H	H	H	A	H
Squ19F	Sequ0748TUF	H	H	H	A	H	A	H	H	H	A	A	A	A	H	H	H	A	A	A	H	H	A	A	H	A	H	H	H	A	A	A	A	A	H	A	H	A	A	A	H	A	A	H	H	H	H	A	H
Squ19F	Sequ0506TUF	H	H	H	A	H	A	H	H	H	A	A	A	A	H	H	H	A	A	A	H	H	A	A	H	A	H	H	H	A	A	A	A	A	H	A	H	A	A	A	H	A	A	H	H	H	H	A	H
Squ19F	Sequ0783TUF	H	H	H	A	H	A	H	H	H	A	A	A	A	H	H	H	A	A	A	H	H	A	A	H	A	H	H	H	A	A	A	A	A	H	A	H	A	A	A	H	A	A	H	H	H	H	A	H
Squ19F	Sequ0993TUF	H	H	H	A	H	A	H	H	H	A	A	A	A	H	H	H	A	A	A	H	H	A	A	H	A	H	H	H	A	A	A	A	A	H	A	H	A	A	A	H	A	A	H	H	H	H	A	H
Squ19F	Sequ0038BAC	H	H	H	A	H	A	H	H	H	A	A	A	A	H	H	H	A	A	A	H	H	A	A	H	A	H	H	H	A	A	A	A	A	H	A	H	A	A	A	H	A	A	H	H	H	H	A	H
Squ19F	Sequ2114BAC	H	H	H	A	H	A	H	H	H	A	A	A	A	H	H	H	A	A	A	H	H	A	A	H	A	H	H	H	A	A	A	A	A	H	A	H	A	A	A	H	A	A	H	H	H	H	A	H
Squ19F	Sequ2697BAC	H	H	H	A	H	A	H	H	H	A	A	A	A	H	H	H	A	A	A	H	H	A	A	H	A	H	H	H	A	A	A	A	A	H	A	H	A	A	A	H	A	A	H	H	H	H	A	H
Squ20F	Sequ0439TUF	A	A	A	A	A	A	A	A	H	A	A	A	A	H	H	A	A	A	A	A	A	A	A	H	A	A	H	A	H	H	H	A	H	H	A	H	H	H	H	H	H	A	A	A	H	A	A	H
Squ20F	Sequ1071TUF	A	A	A	A	A	A	A	A	H	A	A	A	A	H	H	A	A	A	A	A	A	A	A	H	A	A	H	A	H	H	H	A	H	H	A	H	H	H	H	H	H	A	A	A	H	A	A	H
Squ20F	Sequ1100BAC	A	A	A	A	A	A	A	A	H	A	A	A	A	H	H	A	A	A	A	A	A	A	A	H	A	A	H	A	H	H	H	A	H	H	A	H	H	H	H	H	H	A	A	A	H	A	A	H
Squ20F	Sequ2134BAC	A	A	A	A	A	A	A	A	H	A	A	A	A	H	H	A	A	A	A	A	A	A	A	H	A	A	H	A	H	H	H	A	H	H	A	H	H	H	H	H	H	A	A	A	H	A	A	H
Squ20F	Sequ01056SNP	A	A	A	A	A	A	A	A	H	A	A	A	A	H	H	A	A	A	A	A	A	A	A	H	A	A	H	A	H	H	H	A	H	H	A	H	H	H	H	H	H	A	A	A	H	A	A	H
Squ20F	Sequ02679SNP	A	A	A	A	A	A	A	A	H	A	A	A	A	H	H	A	A	A	A	A	A	A	A	H	A	A	H	A	H	H	H	A	H	H	A	H	H	H	H	H	H	A	A	A	H	A	A	H
Squ20F	Sequ0938TUF	A	A	A	A	A	A	A	A	H	A	A	A	A	H	H	A	A	A	A	A	A	H	A	H	A	A	H	A	H	H	H	A	H	H	A	H	H	H	H	H	H	A	A	A	H	A	A	H
Squ20F	Sequ1072TUF	A	A	A	A	A	A	A	A	H	A	A	A	A	H	H	A	A	A	A	A	A	H	A	H	A	A	H	A	H	H	H	A	H	H	A	H	H	H	H	H	H	A	A	A	H	A	A	H
Squ20F	Sequ3071BAC	A	A	A	A	A	A	A	A	H	A	A	A	A	H	H	A	A	A	A	A	A	H	A	H	A	A	H	A	H	H	H	A	H	H	A	H	H	H	H	H	H	A	A	A	H	A	A	H
Squ20F	Sequ0537TUF	A	A	A	A	A	A	A	A	H	A	A	A	A	H	H	A	A	A	A	A	A	H	A	H	A	A	H	A	H	H	H	A	H	H	A	H	H	H	H	H	H	A	A	A	H	A	A	H
Squ20F	Sequ0719TUF	A	A	A	A	A	A	A	A	H	A	A	A	A	H	H	A	A	A	A	A	A	H	A	H	A	A	H	A	H	H	H	A	H	H	A	H	H	H	H	H	H	A	A	A	H	A	A	H
Squ20F	Sequ0730TUF	A	A	A	A	A	A	A	A	H	A	A	A	A	H	H	A	A	A	A	A	A	H	A	H	A	A	H	A	H	H	H	A	H	H	A	H	H	H	H	H	H	A	A	A	H	A	A	H
Squ20F	Sequ0829TUF	A	A	A	A	A	A	A	A	H	A	A	A	A	H	H	A	A	A	A	A	A	H	A	H	A	A	H	A	H	H	H	A	H	H	A	H	H	H	H	H	H	A	A	A	H	A	A	H
Squ20F	Sequ0836TUF	A	A	A	A	A	A	A	A	H	A	A	A	A	H	H	A	A	A	A	A	A	H	A	H	A	A	H	A	H	H	H	A	H	H	A	H	H	H	H	H	H	A	A	A	H	A	A	H
Squ20F	Sequ1073TUF	A	A	A	A	A	A	A	A	H	A	A	A	A	H	H	A	A	A	A	A	A	H	A	H	A	A	H	A	H	H	H	A	H	H	A	H	H	H	H	H	H	A	A	A	H	A	A	H
Squ20F	Sequ1074TUF	A	A	A	A	A	A	A	A	H	A	A	A	A	H	H	A	A	A	A	A	A	H	A	H	A	A	H	A	H	H	H	A	H	H	A	H	H	H	H	H	H	A	A	A	H	A	A	H
Squ20F	Sequ1075TUF	A	A	A	A	A	A	A	A	H	A	A	A	A	H	H	A	A	A	A	A	A	H	A	H	A	A	H	A	H	H	H	A	H	H	A	H	H	H	H	H	H	A	A	A	H	A	A	H
Squ20F	Sequ1076TUF	A	A	A	A	A	A	A	A	H	A	A	A	A	H	H	A	A	A	A	A	A	H	A	H	A	A	H	A	H	H	H	A	H	H	A	H	H	H	H	H	H	A	A	A	H	A	A	H
Squ20F	Sequ0017BAC	A	A	A	A	A	A	A	A	H	A	A	A	A	H	H	A	A	A	A	A	A	H	A	H	A	A	H	A	H	H	H	A	H	H	A	H	H	H	H	H	H	A	A	A	H	A	A	H
Squ20F	Sequ0596BAC	A	A	A	A	A	A	A	A	H	A	A	A	A	H	H	A	A	A	A	A	A	H	A	H	A	A	H	A	H	H	H	A	H	H	A	H	H	H	H	H	H	A	A	A	H	A	A	H
Squ20F	Sequ1989BAC	A	A	A	A	A	A	A	A	H	A	A	A	A	H	H	A	A	A	A	A	A	H	A	H	A	A	H	A	H	H	H	A	H	H	A	H	H	H	H	H	H	A	A	A	H	A	A	H
Squ20F	Sequ2312BAC	A	A	A	A	A	A	A	A	H	A	A	A	A	H	H	A	A	A	A	A	A	H	A	H	A	A	H	A	H	H	H	A	H	H	A	H	H	H	H	H	H	A	A	A	H	A	A	H
Squ20F	Sequ2569BAC	A	A	A	A	A	A	A	A	H	A	A	A	A	H	H	A	A	A	A	A	A	H	A	H	A	A	H	A	H	H	H	A	H	H	A	H	H	H	H	H	H	A	A	A	H	A	A	H
Squ20F	Sequ2645BAC	A	A	A	A	A	A	A	A	H	A	A	A	A	H	H	A	A	A	A	A	A	H	A	H	A	A	H	A	H	H	H	A	H	H	A	H	H	H	H	H	H	A	A	A	H	A	A	H
Squ20F	Sequ00695SNP	A	A	A	A	A	A	A	A	H	A	A	A	A	H	-	A	A	A	A	A	A	H	A	H	A	A	H	A	H	H	H	A	H	H	A	H	H	H	H	H	H	A	A	A	H	A	A	H
Squ20F	Sequ02734SNP	A	A	A	-	A	A	A	A	H	A	A	A	A	H	H	A	A	A	A	A	A	H	A	H	A	A	H	A	H	H	H	A	H	H	A	H	H	H	H	H	-	A	A	-	H	A	A	H
Squ20F	Sequ1077TUF	A	A	A	A	A	A	A	A	H	A	A	A	A	H	H	A	A	A	A	A	A	H	A	H	A	A	H	A	H	H	H	A	H	H	A	H	H	H	H	A	H	A	A	A	H	A	A	H
Squ20F	Sequ0808TUF	A	A	A	A	A	A	A	A	H	A	A	A	A	H	H	A	A	A	A	A	A	A	A	H	A	A	H	A	H	H	H	A	H	H	A	H	H	H	H	A	H	A	A	A	H	A	H	H
Squ20F	Sequ1079TUF	A	A	A	A	A	A	A	A	H	A	A	A	A	H	H	A	A	A	A	A	A	A	A	H	A	A	H	A	H	H	H	A	H	H	A	H	H	H	H	A	H	A	A	A	H	A	H	H
Squ20F	Sequ0288TUF	A	A	A	A	A	A	A	A	H	A	A	A	A	H	H	A	A	A	A	A	A	A	H	H	A	A	H	H	H	H	H	A	H	H	A	H	H	H	H	A	H	H	A	A	H	A	H	H
Squ20F	Sequ0283TUF	H	H	A	A	A	A	A	A	H	A	H	A	A	A	H	A	A	H	A	H	H	A	H	A	A	A	H	H	H	A	H	H	H	H	A	A	H	H	A	A	H	H	A	A	H	A	H	H
Squ20F	Sequ0234TUF	H	H	A	A	H	A	A	A	H	A	H	A	A	A	H	A	A	H	A	H	H	A	H	A	A	A	H	H	H	A	H	H	H	H	H	A	A	H	A	A	H	H	A	A	H	A	H	H
Squ20F	Sequ1702BAC	H	H	H	A	H	H	H	A	H	A	H	H	A	A	H	A	A	H	A	H	H	A	H	A	A	A	H	H	H	A	H	H	A	H	H	A	A	H	A	A	H	H	A	A	H	A	H	H
Squ20F	Sequ0636BAC	H	H	H	A	H	H	H	A	H	A	H	H	A	A	H	A	A	H	A	H	H	A	H	A	A	A	H	H	H	A	H	H	A	H	H	A	A	H	A	A	H	H	A	A	H	A	H	H
Squ21F	Sequ0540TUF	H	A	H	H	A	A	A	A	H	H	H	A	H	A	A	H	A	A	A	A	H	H	H	H	A	H	A	H	A	A	H	A	A	H	H	A	H	H	A	A	H	H	H	H	H	H	A	A
Squ21F	Sequ0940TUF	H	A	H	H	A	A	A	A	H	H	H	A	H	A	A	H	A	A	A	A	H	H	H	H	A	H	A	H	A	A	H	A	A	H	H	A	H	H	A	A	H	H	H	H	H	H	A	A
Squ21F	Sequ3119BAC	H	A	H	H	A	A	A	A	H	H	H	A	H	A	A	H	A	A	A	A	H	H	H	H	A	H	A	H	A	A	H	A	A	H	H	A	H	H	A	A	H	H	H	H	H	H	A	A
Squ21F	Sequ3313BAC	H	A	H	H	A	A	A	A	H	H	H	A	H	A	A	H	A	A	A	A	H	H	H	H	A	H	A	H	A	A	H	A	A	H	H	A	H	H	A	A	H	H	H	H	H	H	A	A
Squ21F	Sequ1316BAC	H	A	A	H	A	A	A	A	H	H	H	A	H	A	A	H	A	A	A	A	H	H	H	H	A	H	A	H	A	A	H	A	H	H	H	A	H	H	A	A	H	H	H	H	H	H	A	A
Squ21F	Sequ0519TUF	H	A	A	H	A	A	A	A	H	H	H	A	H	A	H	A	A	A	A	A	H	H	H	H	A	H	A	H	A	A	H	A	H	H	H	H	H	H	A	A	H	H	H	H	H	H	A	A
Squ21F	Sequ0657BAC	H	A	A	H	A	A	A	A	H	H	H	A	H	A	H	A	A	A	A	A	H	H	H	H	A	H	A	H	A	A	H	A	H	H	H	H	H	H	A	A	H	H	H	H	H	H	H	A
Squ21F	Sequ0597BAC	H	A	A	H	A	A	A	A	H	H	H	A	H	A	H	A	A	A	A	A	H	H	H	H	H	H	A	H	A	A	H	A	H	H	H	H	H	H	A	A	A	H	H	H	H	H	H	A
Squ21F	Sequ0618TUF	H	A	A	H	A	A	A	A	H	H	H	A	H	A	H	A	A	A	A	A	H	H	H	H	H	H	A	H	A	A	H	A	H	H	H	H	H	H	A	A	A	H	H	H	H	H	H	A
Squ21F	Sequ1342BAC	A	A	A	H	A	A	A	H	H	H	H	A	A	A	H	A	A	H	A	A	A	A	H	H	H	H	A	H	H	A	H	H	H	H	H	H	H	H	A	A	A	A	H	H	H	H	H	A
Squ21F	Sequ2315BAC	A	A	A	H	A	A	A	H	H	H	H	A	A	A	H	A	A	H	A	A	A	A	H	H	H	H	A	H	H	A	A	H	H	H	H	H	H	H	A	A	A	A	H	H	H	H	H	A
Squ21F	Sequ0593TUF	A	A	A	H	A	A	A	H	H	H	A	A	A	A	H	A	A	H	A	A	A	A	H	A	H	H	A	H	H	A	A	H	H	H	A	H	H	H	A	A	A	A	H	H	H	H	H	A
Squ21F	Sequ0607TUF	A	A	A	H	A	A	A	H	H	H	A	A	A	A	H	A	A	H	A	A	A	A	H	A	H	H	A	H	H	A	A	H	H	H	A	H	H	H	A	A	A	A	H	H	H	H	H	A
Squ21F	Sequ0764TUF	A	A	A	H	A	A	A	H	H	H	A	A	A	A	H	A	A	H	A	A	A	A	H	A	H	H	A	H	H	A	A	H	H	H	A	H	H	H	A	A	A	A	H	H	H	H	H	A
Squ21F	Sequ0953TUF	A	A	A	H	A	A	A	H	H	H	A	A	A	A	H	A	A	H	A	A	A	A	H	A	H	H	A	H	H	A	A	H	H	H	A	H	H	H	A	A	A	A	H	H	H	H	H	A
Squ21F	Sequ1031TUF	A	A	A	H	A	A	A	H	H	H	A	A	A	A	H	A	A	H	A	A	A	A	H	A	H	H	A	H	H	A	A	H	H	H	A	H	H	H	A	A	A	A	H	H	H	H	H	A
Squ21F	Sequ0784BAC	A	A	A	H	A	A	A	H	H	H	A	A	A	A	H	A	A	H	A	A	A	A	H	A	H	H	A	H	H	A	A	H	H	H	A	H	H	H	A	A	A	A	H	H	H	H	H	A
Squ21F	Sequ2314BAC	A	A	A	H	A	A	A	H	H	H	A	A	A	A	H	A	A	H	A	A	A	A	H	A	H	H	A	H	H	A	A	H	H	H	A	H	H	H	A	A	A	A	H	H	H	H	H	A
Squ21F	Sequ0979TUF	A	A	A	H	A	A	A	H	H	H	A	A	A	A	H	A	A	H	A	A	A	A	A	A	H	H	A	H	H	A	A	H	H	H	A	H	H	H	A	A	A	A	H	H	H	H	H	A
Squ21F	Sequ0251TUF	A	A	A	H	A	A	A	H	H	H	A	A	A	A	H	A	A	H	A	A	A	A	A	A	H	H	A	H	H	A	A	H	H	H	A	H	H	H	A	A	A	A	H	H	H	H	H	A
Squ21F	Sequ0316TUF	A	A	A	H	A	A	A	H	H	H	A	A	A	A	H	A	A	H	A	A	A	A	A	A	H	H	A	H	H	A	A	H	H	H	A	H	H	H	A	A	A	A	H	H	H	H	H	A
Squ21F	Sequ0406TUF	A	A	A	H	A	A	A	H	H	H	A	A	A	A	H	A	A	H	A	A	A	A	A	A	H	H	A	H	H	A	A	H	H	H	A	H	H	H	A	A	A	A	H	H	H	H	H	A
Squ21F	Sequ0580TUF	A	A	A	H	A	A	A	H	H	H	A	A	A	A	H	A	A	H	A	A	A	A	A	A	H	H	A	H	H	A	A	H	H	H	A	H	H	H	A	A	A	A	H	H	H	H	H	A
Squ21F	Sequ0715TUF	A	A	A	H	A	A	A	H	H	H	A	A	A	A	H	A	A	H	A	A	A	A	A	A	H	H	A	H	H	A	A	H	H	H	A	H	H	H	A	A	A	A	H	H	H	H	H	A
Squ21F	Sequ0763TUF	A	A	A	H	A	A	A	H	H	H	A	A	A	A	H	A	A	H	A	A	A	A	A	A	H	H	A	H	H	A	A	H	H	H	A	H	H	H	A	A	A	A	H	H	H	H	H	A
Squ21F	Sequ0800TUF	A	A	A	H	A	A	A	H	H	H	A	A	A	A	H	A	A	H	A	A	A	A	A	A	H	H	A	H	H	A	A	H	H	H	A	H	H	H	A	A	A	A	H	H	H	H	H	A
Squ21F	Sequ1230BAC	A	A	A	H	A	A	A	H	H	H	A	A	A	A	H	A	A	H	A	A	A	A	A	A	H	H	A	H	H	A	A	H	H	H	A	H	H	H	A	A	A	A	H	H	H	H	H	A
Squ21F	Sequ3296BAC	A	A	A	H	A	A	A	H	H	H	A	A	A	A	H	A	A	H	A	A	A	A	A	A	H	H	A	H	H	A	A	H	H	H	A	H	H	H	A	A	A	A	H	H	H	H	H	A
Squ21F	Sequ00998SNP	A	A	A	H	A	A	A	H	H	H	A	A	A	A	H	A	A	H	A	A	A	A	A	A	H	H	A	H	H	A	A	H	H	H	A	H	H	H	A	A	A	A	H	H	H	H	H	A
Squ21F	Sequ02941SNP	A	A	A	H	A	A	A	H	H	H	A	A	A	A	H	A	A	H	A	A	A	A	A	A	H	H	A	H	H	A	A	H	H	H	A	H	H	H	A	A	A	A	H	H	H	H	H	A
Squ21F	Sequ04107SNP	A	A	A	H	A	A	A	H	H	H	A	A	A	A	H	A	A	H	A	A	A	A	A	A	H	H	A	H	H	A	A	H	H	H	A	H	H	H	A	A	A	A	H	H	H	H	H	A
Squ21F	Sequ02376SNP	A	A	A	H	A	A	A	H	H	H	A	A	A	A	H	A	A	H	A	A	A	A	A	A	H	H	A	H	H	A	A	H	H	H	A	H	H	H	A	A	H	A	H	H	H	H	H	A
Squ22F	Sequ0137TUF	A	H	A	A	H	A	A	A	H	H	H	H	H	A	H	A	A	H	H	A	H	H	H	A	H	A	H	A	A	H	A	A	A	A	A	H	A	A	A	H	A	H	H	H	H	A	A	H
Squ22F	Sequ0733TUF	A	H	A	A	H	A	A	A	H	H	H	H	H	A	H	A	A	H	H	A	H	H	H	A	H	A	H	A	A	H	A	A	A	A	A	H	A	A	A	H	A	H	H	H	H	A	A	H
Squ22F	Sequ0734TUF	A	H	A	A	H	A	A	A	H	H	H	H	H	A	H	A	A	H	H	A	H	H	H	A	H	A	H	A	A	H	A	A	A	A	A	H	A	A	A	H	A	H	H	H	H	A	A	H
Squ22F	Sequ04914SNP	A	H	A	A	H	A	A	A	H	H	H	H	H	A	H	A	A	H	H	A	H	H	H	A	H	A	H	-	A	H	A	A	A	A	A	H	A	A	A	H	A	H	H	H	H	A	A	H
Squ22F	Sequ1311BAC	A	H	A	A	H	A	A	A	H	H	H	H	H	A	H	A	A	H	H	A	H	H	H	A	H	A	H	A	A	H	A	A	A	A	A	H	A	A	A	H	A	H	H	H	H	A	A	H
Squ22F	Sequ3186BAC	A	H	A	A	H	A	A	A	H	H	H	H	H	A	H	A	A	H	H	A	H	H	H	A	H	A	H	A	A	H	A	A	A	A	A	H	A	A	A	H	A	H	H	H	H	A	A	H
Squ22F	Sequ0981BAC	A	H	A	A	H	A	A	A	H	H	H	H	H	A	H	A	A	A	H	A	H	H	H	A	H	A	H	A	A	H	A	A	H	A	A	H	A	A	A	H	A	H	H	H	H	A	A	H
Squ22F	Sequ2391BAC	A	H	A	A	H	A	A	A	H	H	H	H	H	A	H	A	A	A	H	A	H	H	H	A	H	A	H	A	A	H	A	A	H	A	A	H	A	A	A	H	A	H	H	H	H	A	A	H
Squ22F	Sequ00287SNP	A	H	A	A	H	A	A	A	H	H	H	H	H	A	H	A	A	A	H	A	H	H	H	A	H	A	H	A	A	H	A	A	H	A	A	H	A	A	A	H	A	H	H	H	H	A	A	H
Squ22F	Sequ0551TUF	A	H	A	A	H	A	A	A	H	H	H	H	H	A	H	A	A	A	H	A	H	H	H	A	H	A	H	A	A	A	A	A	H	A	H	H	A	A	A	H	A	H	H	H	H	A	A	H
Squ22F	Sequ0977TUF	A	H	A	A	H	A	A	A	H	H	H	H	H	A	H	A	A	A	H	A	H	H	H	A	H	A	H	A	A	A	A	A	H	A	H	H	A	A	A	H	A	H	H	H	H	A	A	H
Squ22F	Sequ2012BAC	A	H	A	A	H	A	A	A	H	H	H	H	H	A	H	A	A	A	H	A	H	H	H	A	H	A	H	A	A	A	A	A	H	A	H	H	A	A	A	H	A	H	H	H	H	A	A	H
Squ22F	Sequ2050BAC	A	H	A	A	H	A	A	A	H	H	H	H	H	A	H	A	A	A	H	A	H	H	H	A	H	A	H	A	A	A	A	A	H	A	H	H	A	A	A	H	A	H	H	H	H	A	A	H
Squ22F	Sequ03290SNP	A	H	-	A	-	A	A	A	H	H	H	H	H	A	H	A	A	A	H	A	H	H	H	A	H	A	H	A	A	A	A	A	H	A	H	H	A	A	A	H	A	H	H	H	H	A	A	H
Squ22F	Sequ01869SNP	A	H	A	-	H	A	A	A	H	H	H	H	H	A	H	A	A	A	H	A	H	H	H	A	H	A	H	A	A	A	A	A	H	A	H	H	A	A	A	H	A	H	H	H	H	A	A	H
Squ22F	Sequ0192TUF	A	H	A	A	H	A	A	A	H	H	H	H	H	A	H	A	A	A	H	A	H	H	H	A	H	A	H	A	A	A	A	A	H	A	H	H	A	A	A	H	A	H	H	H	H	A	A	H
Squ22F	Sequ0650TUF	A	H	A	A	H	A	A	A	H	H	H	H	H	A	H	A	A	A	H	A	H	H	H	A	H	A	H	A	A	A	A	A	H	A	H	H	A	A	A	H	A	H	H	H	H	A	A	H
Squ22F	Sequ0663TUF	A	H	A	A	H	A	A	A	H	H	H	H	H	A	H	A	A	A	H	A	H	H	H	A	H	A	H	A	A	A	A	A	H	A	H	H	A	A	A	H	A	H	H	H	H	A	A	H
Squ22F	Sequ0803TUF	A	H	A	A	H	A	A	A	H	H	H	H	H	A	H	A	A	A	H	A	H	H	H	A	H	A	H	A	A	A	A	A	H	A	H	H	A	A	A	H	A	H	H	H	H	A	A	H
Squ22F	Sequ0809TUF	A	H	A	A	H	A	A	A	H	H	H	H	H	A	H	A	A	A	H	A	H	H	H	A	H	A	H	A	A	A	A	A	H	A	H	H	A	A	A	H	A	H	H	H	H	A	A	H
Squ22F	Sequ0294BAC	A	H	A	A	H	A	A	A	H	H	H	H	H	A	H	A	A	A	H	A	H	H	H	A	H	A	H	A	A	A	A	A	H	A	H	H	A	A	A	H	A	H	H	H	H	A	A	H
Squ22F	Sequ0324BAC	A	H	A	A	H	A	A	A	H	H	H	H	H	A	H	A	A	A	H	A	H	H	H	A	H	A	H	A	A	A	A	A	H	A	H	H	A	A	A	H	A	H	H	H	H	A	A	H
Squ22F	Sequ0155BAC	A	H	A	A	H	A	A	A	A	H	H	H	H	A	H	A	A	A	H	A	H	H	H	A	H	A	H	A	A	A	A	A	H	A	H	H	A	A	A	H	A	H	H	H	H	A	A	A
Squ22F	Sequ2059BAC	A	H	A	A	H	A	A	A	A	H	H	H	H	A	H	A	A	A	H	A	H	H	H	A	H	A	H	A	A	A	A	A	H	A	H	H	A	A	A	H	A	H	H	H	H	A	A	A
Squ22F	Sequ0917TUF	A	H	A	A	A	A	A	A	A	H	H	H	H	H	H	A	A	A	H	A	H	H	H	A	H	A	H	A	H	A	A	A	H	A	H	H	A	A	A	H	A	H	H	H	H	A	H	A
Squ22F	Sequ0555TUF	A	H	A	A	A	A	A	A	A	H	H	H	H	H	H	A	A	A	H	A	H	A	A	A	H	A	H	A	H	A	A	A	H	A	H	H	A	A	A	H	A	H	H	H	H	A	H	A
Squ22F	Sequ2979BAC	A	H	A	A	A	A	A	A	A	H	H	H	H	H	H	A	A	A	H	A	H	A	A	A	H	A	H	A	H	A	A	A	H	A	H	H	A	H	A	H	A	H	H	H	H	A	H	A
Squ22F	Sequ0826TUF	A	H	H	A	A	A	A	A	A	A	H	H	H	H	H	A	A	A	H	A	H	A	A	A	H	A	H	A	H	A	H	H	H	A	H	H	H	H	A	H	H	H	H	A	H	A	H	A
Squ22F	Sequ1972BAC	A	A	H	A	A	H	A	A	A	A	H	H	H	H	A	A	A	A	H	A	H	A	A	A	H	A	H	A	H	A	H	H	H	A	H	H	H	H	A	H	H	H	H	A	H	A	H	A
Squ23F	Sequ0522TUF	A	H	H	A	H	H	H	A	A	H	A	A	A	A	A	A	A	A	A	A	A	A	A	H	A	H	A	A	A	H	A	H	H	H	A	A	A	H	H	H	A	H	A	A	H	A	H	A
Squ23F	Sequ0641TUF	A	H	H	A	H	H	H	A	A	H	A	A	A	A	A	A	A	A	A	A	A	A	A	H	A	H	A	A	A	H	A	H	H	H	A	A	A	H	H	H	A	H	A	A	H	A	H	A
Squ23F	Sequ0414BAC	A	H	H	A	H	H	H	A	A	H	A	A	A	A	A	A	A	A	A	A	A	A	A	H	A	H	A	A	A	H	A	H	H	H	A	A	A	H	H	H	A	H	A	A	H	A	H	A
Squ23F	Sequ0987BAC	A	H	H	A	H	H	H	A	A	H	A	A	A	A	A	A	A	A	A	A	A	A	A	H	A	H	A	A	A	H	A	H	H	H	A	A	A	H	H	H	A	H	A	A	H	A	H	A
Squ23F	Sequ04195SNP	A	H	H	A	H	H	H	A	A	H	A	A	A	A	A	A	A	A	A	A	A	A	A	H	A	H	A	A	A	H	A	H	H	H	A	A	A	H	H	H	A	H	A	A	H	A	H	A
Squ23F	Sequ1023TUF	A	H	H	A	A	H	H	A	A	H	A	A	A	A	A	A	A	A	A	A	A	A	A	H	A	H	A	A	A	H	A	H	H	H	A	A	A	H	H	H	A	H	A	A	H	A	H	A
Squ23F	Sequ1777BAC	A	H	H	A	A	H	H	A	A	H	A	A	A	A	A	A	A	A	A	A	A	A	A	H	A	H	A	A	A	H	A	H	H	H	A	A	A	H	H	H	A	H	A	A	H	A	H	A
Squ23F	Sequ0199TUF	A	H	H	A	A	H	H	A	A	H	A	A	A	A	A	A	A	A	A	A	A	A	A	H	A	H	A	A	A	H	A	H	H	H	A	A	A	H	H	H	A	A	A	A	H	A	H	A
Squ23F	Sequ2613BAC	A	H	H	A	A	H	H	A	A	H	A	A	A	A	A	A	A	A	A	A	A	A	A	H	A	H	A	A	A	H	A	H	H	H	A	A	A	H	H	H	A	A	A	A	H	A	H	A
Squ23F	Sequ2859BAC	A	H	H	A	A	H	H	A	A	H	A	A	A	A	A	A	A	A	A	A	A	A	A	H	A	H	A	A	A	H	A	H	H	H	A	A	A	H	H	H	A	A	A	A	H	A	H	A
Squ23F	Sequ00208_1SNP	A	H	H	A	A	H	H	A	A	H	A	A	A	A	A	A	A	A	A	A	A	A	A	H	A	H	A	A	A	H	A	H	H	H	A	A	A	H	H	H	A	A	A	A	H	A	H	A
Squ23F	Sequ00208_2SNP	A	H	H	A	A	H	H	A	A	H	A	A	A	A	A	A	A	A	A	A	A	A	A	H	A	H	A	A	A	H	A	H	H	H	A	A	A	H	H	H	A	A	A	A	H	A	H	A
Squ23F	Sequ02760SNP	A	H	H	A	A	H	H	A	A	H	A	A	A	A	A	A	A	A	A	A	A	A	A	H	A	H	A	A	A	H	A	H	H	H	A	A	A	H	H	H	A	A	A	A	H	A	H	A
Squ23F	Sequ03273SNP	A	H	H	A	A	H	H	A	A	H	A	A	A	A	A	A	A	A	A	A	A	A	A	H	A	H	A	A	A	H	A	H	H	H	A	A	A	H	H	H	A	A	A	A	H	A	H	A
Squ23F	Sequ0123TUF	A	H	H	A	A	H	H	A	A	H	A	A	A	A	A	A	A	A	A	A	A	A	A	H	A	H	A	A	A	H	A	H	H	H	A	A	A	A	H	H	A	A	A	A	H	A	H	A
Squ23F	Sequ0411TUF	A	H	H	A	A	H	H	A	A	H	A	A	A	A	A	A	A	A	A	A	A	A	A	H	A	H	A	A	A	H	A	H	H	H	A	A	A	A	H	H	A	A	A	A	H	A	H	A
Squ23F	Sequ0635TUF	A	H	H	A	A	H	H	A	A	H	A	A	A	A	A	A	A	A	A	A	A	A	A	H	A	H	A	A	A	H	A	H	H	H	A	A	A	A	H	H	A	A	A	A	H	A	H	A
Squ23F	Sequ0704TUF	A	H	H	A	A	H	H	A	A	H	A	A	A	A	A	A	A	A	A	A	A	A	A	H	A	H	A	A	A	H	A	H	H	H	A	A	A	A	H	H	A	A	A	A	H	A	H	A
Squ23F	Sequ0770TUF	A	H	H	A	A	H	H	A	A	H	A	A	A	A	A	A	A	A	A	A	A	A	A	H	A	H	A	A	A	H	A	H	H	H	A	A	A	A	H	H	A	A	A	A	H	A	H	A
Squ23F	Sequ0773TUF	A	H	H	A	A	H	H	A	A	H	A	A	A	A	A	A	A	A	A	A	A	A	A	H	A	H	A	A	A	H	A	H	H	H	A	A	A	A	H	H	A	A	A	A	H	A	H	A
Squ23F	Sequ0963TUF	A	H	H	A	A	H	H	A	A	H	A	A	A	A	A	A	A	A	A	A	A	A	A	H	A	H	A	A	A	H	A	H	H	H	A	A	A	A	H	H	A	A	A	A	H	A	H	A
Squ23F	Sequ0976TUF	A	H	H	A	A	H	H	A	A	H	A	A	A	A	A	A	A	A	A	A	A	A	A	H	A	H	A	A	A	H	A	H	H	H	A	A	A	A	H	H	A	A	A	A	H	A	H	A
Squ23F	Sequ0982TUF	A	H	H	A	A	H	H	A	A	H	A	A	A	A	A	A	A	A	A	A	A	A	A	H	A	H	A	A	A	H	A	H	H	H	A	A	A	A	H	H	A	A	A	A	H	A	H	A
Squ23F	Sequ0619BAC	A	H	H	A	A	H	H	A	A	H	A	A	A	A	A	A	A	A	A	A	A	A	A	H	A	H	A	A	A	H	A	H	H	H	A	A	A	A	H	H	A	A	A	A	H	A	H	A
Squ23F	Sequ1289BAC	A	H	H	A	A	H	H	A	A	H	A	A	A	A	A	A	A	A	A	A	A	A	A	H	A	H	A	A	A	H	A	H	H	H	A	A	A	A	H	H	A	A	A	A	H	A	H	A
Squ23F	Sequ1447BAC	A	H	H	A	A	H	H	A	A	H	A	A	A	A	A	A	A	A	A	A	A	A	A	H	A	H	A	A	A	H	A	H	H	H	A	A	A	A	H	H	A	A	A	A	H	A	H	A
Squ23F	Sequ1561BAC	A	H	H	A	A	H	H	A	A	H	A	A	A	A	A	A	A	A	A	A	A	A	A	H	A	H	A	A	A	H	A	H	H	H	A	A	A	A	H	H	A	A	A	A	H	A	H	A
Squ23F	Sequ00166SNP	A	H	H	A	A	H	H	A	A	H	A	A	A	A	A	A	A	A	A	A	A	A	A	H	A	H	A	A	A	H	A	H	H	H	A	A	A	A	H	H	A	A	A	A	H	A	H	A
Squ23F	Sequ1571BAC	A	H	H	H	A	H	H	A	A	H	H	A	A	A	A	A	A	A	A	A	A	A	A	A	A	H	A	A	A	H	A	H	H	H	A	A	A	A	H	H	A	A	A	A	H	A	H	A
Squ23F	Sequ1027TUF	A	H	H	H	A	H	H	H	A	H	H	A	A	A	A	A	A	A	A	A	A	A	A	A	A	H	A	A	A	H	A	H	H	H	A	A	A	A	H	H	A	A	A	A	H	A	H	A
Squ23F	Sequ04026SNP	A	H	H	-	A	H	H	H	A	H	H	A	A	H	H	A	H	A	A	A	A	A	A	A	H	H	A	A	A	H	A	H	H	A	A	H	A	-	H	H	A	A	H	A	H	H	H	A
Squ23F	Sequ0010BAC	A	H	H	H	A	H	H	H	A	H	H	H	A	H	H	H	H	A	H	A	A	H	A	A	H	H	A	A	A	H	A	H	H	A	A	H	A	A	H	H	A	A	H	A	H	H	H	A
Squ24F	Sequ0168TUF	A	A	A	A	A	A	A	H	A	A	A	A	A	H	A	A	A	A	H	H	H	H	H	A	A	H	A	A	A	A	A	H	A	A	H	A	A	H	A	A	A	H	H	A	A	H	A	A
Squ24F	Sequ0258TUF	A	A	A	A	A	A	A	H	A	A	A	A	A	H	A	A	A	A	H	H	H	H	H	A	A	H	A	A	A	A	A	H	A	A	H	A	A	H	A	A	A	H	H	A	A	H	A	A
Squ24F	Sequ0613TUF	A	A	A	A	A	A	A	H	A	A	A	A	A	H	A	A	A	A	H	H	H	H	H	A	A	H	A	A	A	A	A	H	A	A	H	A	A	H	A	A	A	H	H	A	A	H	A	A
Squ24F	Sequ0646TUF	A	A	A	A	A	A	A	H	A	A	A	A	A	H	A	A	A	A	H	H	H	H	H	A	A	H	A	A	A	A	A	H	A	A	H	A	A	H	A	A	A	H	H	A	A	H	A	A
Squ24F	Sequ01444_1SNP	A	A	A	A	A	A	A	H	A	A	A	A	A	H	A	A	A	A	H	H	H	H	H	A	A	H	A	A	A	A	A	H	A	A	H	A	A	H	A	A	A	H	H	A	A	H	A	A
Squ24F	Sequ01444_2SNP	A	A	A	A	A	A	A	H	A	A	A	A	A	H	A	A	A	A	H	H	H	H	H	A	A	H	A	A	A	A	A	H	A	A	H	A	A	H	A	A	A	H	H	A	A	H	A	A
Squ24F	Sequ2670BAC	A	A	A	A	A	A	A	H	A	A	A	A	A	H	A	A	A	A	H	H	H	H	H	A	A	H	A	A	A	A	A	H	H	A	H	A	A	H	A	A	A	H	H	A	A	H	A	A
Squ24F	Sequ2712BAC	A	A	A	A	A	A	A	A	A	A	A	A	H	A	A	A	A	A	A	A	H	H	A	A	A	A	A	A	A	A	A	H	H	A	H	H	H	A	A	A	A	H	H	A	A	A	A	A
Squ24F	Sequ1329BAC	A	A	A	A	A	A	A	A	A	A	A	A	H	A	A	A	A	A	A	A	H	H	A	A	A	A	A	A	A	A	A	A	H	A	H	H	H	A	A	A	A	H	H	A	A	A	H	A
Squ24F	Sequ2618BAC	A	A	A	A	A	A	A	A	A	A	A	A	H	A	A	A	A	A	A	A	H	H	A	A	A	A	A	A	A	A	A	A	H	A	H	H	H	A	A	A	A	H	H	A	A	A	H	A
Squ24F	Sequ0171TUF	A	A	A	A	A	A	H	A	A	A	A	A	H	A	A	A	A	A	A	A	H	H	A	A	A	A	A	A	A	A	A	A	H	A	H	H	H	A	A	A	A	H	H	A	A	A	H	A
Squ24F	Sequ1048TUF	A	A	A	A	A	A	H	A	A	A	A	A	H	A	A	A	A	A	A	A	H	H	A	A	A	A	A	A	A	A	A	A	H	A	H	H	H	A	A	A	A	H	H	A	A	A	H	A
Squ24F	Sequ1835BAC	A	A	A	A	A	A	H	A	A	A	A	A	H	A	A	A	A	A	A	A	H	H	A	A	A	A	A	A	A	A	A	A	H	A	H	H	H	A	A	A	A	H	H	A	A	A	H	A
Squ24F	Sequ2568BAC	A	A	A	A	A	A	H	A	A	A	A	A	H	A	A	A	A	A	A	A	H	H	A	A	A	A	A	A	A	A	A	A	H	A	H	H	H	A	A	A	A	H	H	A	A	A	H	A
Squ24F	Sequ1003TUF	A	A	A	A	A	A	H	A	A	A	A	A	H	A	A	A	A	A	A	A	H	H	A	A	A	A	A	A	A	A	A	A	A	A	H	H	H	A	A	A	A	H	H	A	A	A	H	H
Squ24F	Sequ0041TUF	A	A	A	A	A	A	H	A	A	A	A	A	H	A	A	A	A	A	A	A	H	H	A	A	A	A	A	A	A	A	A	A	A	A	H	H	H	A	A	A	A	H	H	A	A	A	H	A
Squ24F	Sequ0164TUF	A	A	A	A	A	A	H	A	A	A	A	A	H	A	A	A	A	A	A	A	H	H	A	A	A	A	A	A	A	A	A	A	A	A	H	H	H	A	A	A	A	H	H	A	A	A	H	A
Squ24F	Sequ0846TUF	A	A	A	A	A	A	H	A	A	A	A	A	H	A	A	A	A	A	A	A	H	H	A	A	A	A	A	A	A	A	A	A	A	A	H	H	H	A	A	A	A	H	H	A	A	A	H	A
Squ24F	Sequ0407BAC	A	A	A	A	A	A	H	A	A	A	A	A	H	A	A	A	A	A	A	A	H	H	A	A	A	A	A	A	A	A	A	A	A	A	H	H	H	A	A	A	A	H	H	A	A	A	H	A
Squ24F	Sequ3133BAC	A	A	A	A	A	A	H	A	A	A	A	A	H	A	A	A	A	A	A	A	H	H	A	A	A	A	A	A	A	A	A	A	A	A	H	H	H	A	A	A	A	H	H	A	A	A	H	A
Squ24F	Sequ0525TUF	A	A	A	A	A	A	H	A	A	A	A	A	H	A	A	A	A	A	A	A	H	H	A	A	A	A	A	A	A	A	A	A	A	A	H	H	H	A	A	A	A	H	H	A	A	A	H	H
Squ24F	Sequ0681TUF	A	A	A	A	A	A	H	A	A	A	A	A	H	A	A	A	A	A	A	A	H	H	A	A	A	A	A	A	A	A	A	A	A	A	H	H	H	A	A	A	A	H	H	A	A	A	H	H
Squ24F	Sequ0726TUF	A	A	A	A	A	A	H	A	A	A	A	A	H	A	A	A	A	A	A	A	H	H	A	A	A	A	A	A	A	A	A	A	A	A	H	H	H	A	A	A	A	H	H	A	A	A	H	H
Squ24F	Sequ0912TUF	A	A	A	A	A	A	H	A	A	A	A	A	H	A	A	A	A	A	A	A	H	H	A	A	A	A	A	A	A	A	A	A	A	A	H	H	H	A	A	A	A	H	H	A	A	A	H	H
Squ24F	Sequ0961TUF	A	A	A	A	A	A	H	A	A	A	A	A	H	A	A	A	A	A	A	A	H	H	A	A	A	A	A	A	A	A	A	A	A	A	H	H	H	A	A	A	A	H	H	A	A	A	H	H
Squ24F	Sequ1050TUF	A	A	A	A	A	A	H	A	A	A	A	A	H	A	A	A	A	A	A	A	H	H	A	A	A	A	A	A	A	A	A	A	A	A	H	H	H	A	A	A	A	H	H	A	A	A	H	H
Squ24F	Sequ1107BAC	A	A	A	A	A	A	H	A	A	A	A	A	H	A	A	A	A	A	A	A	H	H	A	A	A	A	A	A	A	A	A	A	A	A	H	H	H	A	A	A	A	H	H	A	A	A	H	H
Squ24F	Sequ1124BAC	A	A	A	A	A	A	H	A	A	A	A	A	H	A	A	A	A	A	A	A	H	H	A	A	A	A	A	A	A	A	A	A	A	A	H	H	H	A	A	A	A	H	H	A	A	A	H	H
Squ24F	Sequ1688BAC	A	A	A	A	A	A	H	A	A	A	A	A	H	A	A	A	A	A	A	A	H	H	A	A	A	A	A	A	A	A	A	A	A	A	H	H	H	A	A	A	A	H	H	A	A	A	H	H
Squ24F	Sequ2123BAC	A	A	A	A	A	A	H	A	A	A	A	A	H	A	A	A	A	A	A	A	H	H	A	A	A	A	A	A	A	A	A	A	A	A	H	H	H	A	A	A	A	H	H	A	A	A	H	H
Squ24F	Sequ2313BAC	A	A	A	A	A	A	H	A	A	A	A	A	H	A	A	A	A	A	A	A	H	H	A	A	A	A	A	A	A	A	A	A	A	A	H	H	H	A	A	A	A	H	H	A	A	A	H	H
Squ24F	Sequ2640BAC	A	A	A	A	A	A	H	A	A	A	A	A	H	A	A	A	A	A	A	A	H	H	A	A	A	A	A	A	A	A	A	A	A	A	H	H	H	A	A	A	A	H	H	A	A	A	H	H
Squ24F	Sequ2751BAC	A	A	A	A	A	A	H	A	A	A	A	A	H	A	A	A	A	A	A	A	H	H	A	A	A	A	A	A	A	A	A	A	A	A	H	H	H	A	A	A	A	H	H	A	A	A	H	H
Squ24F	Sequ2819BAC	A	A	A	A	A	A	H	A	A	A	A	A	H	A	A	A	A	A	A	A	H	H	A	A	A	A	A	A	A	A	A	A	A	A	H	H	H	A	A	A	A	H	H	A	A	A	H	H
Squ24F	Sequ00561SNP	A	A	A	A	A	-	H	A	A	A	A	A	H	A	A	A	A	A	A	A	H	H	A	A	A	A	A	A	A	A	A	A	A	A	H	H	H	A	A	A	A	H	H	A	A	A	H	H
Squ24F	Sequ01016SNP	A	A	A	A	A	A	H	A	A	A	A	A	H	A	A	A	A	A	A	A	H	H	A	A	A	A	A	A	A	A	A	A	A	A	H	H	H	A	A	A	A	H	H	A	A	A	H	H
Squ24F	Sequ02013SNP	A	A	A	A	A	A	H	A	A	A	A	A	H	A	A	A	A	A	A	A	H	H	A	A	A	A	A	A	A	A	A	A	A	A	H	H	H	A	A	A	A	H	H	A	A	A	H	H
Squ24F	Sequ04719_1SNP	A	A	A	A	A	A	H	A	A	A	A	A	H	A	A	A	A	A	A	A	-	H	A	A	A	A	A	A	A	A	A	A	A	A	-	-	-	-	A	A	A	H	H	A	A	A	H	H
Squ24F	Sequ0078BAC	A	A	A	A	A	A	H	A	A	A	A	A	H	A	A	A	A	A	A	A	H	H	A	A	A	A	A	A	A	A	A	A	A	A	H	H	H	A	A	A	A	H	H	A	A	A	H	H
Squ24F	Sequ00968SNP	A	A	H	H	A	A	H	A	A	A	A	A	H	A	A	A	A	A	A	A	H	H	A	A	A	A	A	A	A	A	A	A	A	A	H	H	A	A	A	A	A	H	H	H	A	H	H	H
Squ24F	Sequ0578TUF	A	H	H	H	H	H	H	A	A	H	A	A	H	A	H	A	A	A	A	A	H	H	A	A	A	A	A	H	A	A	A	A	H	A	A	H	A	A	H	H	A	H	H	H	A	H	H	A
Squ24F	Sequ0058TUF	A	H	H	H	H	H	H	A	A	H	A	A	H	A	H	A	A	A	A	A	H	A	A	A	A	A	A	H	A	A	H	A	H	A	A	H	A	H	H	H	A	H	H	H	A	H	H	A
Squ24F	Sequ0600TUF	A	H	H	H	H	H	H	A	A	H	A	A	H	A	H	A	A	A	A	A	H	A	A	A	A	A	A	H	A	A	H	A	H	A	A	H	A	H	H	H	A	H	H	H	A	H	H	A
Squ24F	Sequ0585TUF	A	H	H	H	H	H	H	A	A	H	A	H	H	A	H	A	H	A	A	A	H	A	A	A	A	A	A	H	A	A	H	A	H	A	A	H	A	H	H	H	A	H	H	H	A	H	H	A
[truncated: 42 more columns]

## Sheet: family A male map
Family A male genotype		progeny
linkage group	marker name	1	2	3	4	5	6	7	8	9	10	11	12	13	14	15	16	17	18	19	20	21	22	23	24	25	26	27	28	29	30	31	32	33	34	35	36	37	38	39	40	41	42	43	44	45	46	47	48
Squ1M	Sequ0323TUF	H	H	B	H	H	H	H	B	H	B	B	H	H	B	B	H	H	H	B	H	H	H	B	H	B	H	B	H	B	H	B	B	B	B	B	B	H	H	H	B	B	B	H	B	H	H	H	B
Squ1M	Sequ0419TUF	H	H	B	H	H	H	H	B	H	B	B	H	H	B	B	H	H	H	B	H	H	H	B	H	B	H	B	H	B	H	B	B	B	B	B	B	H	H	H	B	B	B	H	B	H	H	H	B
Squ1M	Sequ0598TUF	H	H	B	H	H	H	H	B	H	B	B	H	H	B	B	H	H	H	B	H	H	H	B	H	B	H	B	H	B	H	B	B	B	B	B	B	H	H	H	B	B	B	H	B	H	H	H	B
Squ1M	Sequ0674TUF	H	H	B	H	H	H	H	B	H	B	B	H	H	B	B	H	H	H	B	H	H	H	B	H	B	H	B	H	B	H	B	B	B	B	B	B	H	H	H	B	B	B	H	B	H	H	H	B
Squ1M	Sequ0741TUF	H	H	B	H	H	H	H	B	H	B	B	H	H	B	B	H	H	H	B	H	H	H	B	H	B	H	B	H	B	H	B	B	B	B	B	B	H	H	H	B	B	B	H	B	H	H	H	B
Squ1M	Sequ0742TUF	H	H	B	H	H	H	H	B	H	B	B	H	H	B	B	H	H	H	B	H	H	H	B	H	B	H	B	H	B	H	B	B	B	B	B	B	H	H	H	B	B	B	H	B	H	H	H	B
Squ1M	Sequ0798TUF	H	H	B	H	H	H	H	B	H	B	B	H	H	B	B	H	H	H	B	H	H	H	B	H	B	H	B	H	B	H	B	B	B	B	B	B	H	H	H	B	B	B	H	B	H	H	H	B
Squ1M	Sequ0844TUF	H	H	B	H	H	H	H	B	H	B	B	H	H	B	B	H	H	H	B	H	H	H	B	H	B	H	B	H	B	H	B	B	B	B	B	B	H	H	H	B	B	B	H	B	H	H	H	B
Squ1M	Sequ0893TUF	H	H	B	H	H	H	H	B	H	B	B	H	H	B	B	H	H	H	B	H	H	H	B	H	B	H	B	H	B	H	B	B	B	B	B	B	H	H	H	B	B	B	H	B	H	H	H	B
Squ1M	Sequ0990TUF	H	H	B	H	H	H	H	B	H	B	B	H	H	B	B	H	H	H	B	H	H	H	B	H	B	H	B	H	B	H	B	B	B	B	B	B	H	H	H	B	B	B	H	B	H	H	H	B
Squ1M	Sequ0166BAC	H	H	B	H	H	H	H	B	H	B	B	H	H	B	B	H	H	H	B	H	H	H	B	H	B	H	B	H	B	H	B	B	B	B	B	B	H	H	H	B	B	B	H	B	H	H	H	B
Squ1M	Sequ0883BAC	H	H	B	H	H	H	H	B	H	B	B	H	H	B	B	H	H	H	B	H	H	H	B	H	B	H	B	H	B	H	B	B	B	B	B	B	H	H	H	B	B	B	H	B	H	H	H	B
Squ1M	Sequ1214BAC	H	H	B	H	H	H	H	B	H	B	B	H	H	B	B	H	H	H	B	H	H	H	B	H	B	H	B	H	B	H	B	B	B	B	B	B	H	H	H	B	B	B	H	B	H	H	H	B
Squ1M	Sequ1845BAC	H	H	B	H	H	H	H	B	H	B	B	H	H	B	B	H	H	H	B	H	H	H	B	H	B	H	B	H	B	H	B	B	B	B	B	B	H	H	H	B	B	B	H	B	H	H	H	B
Squ1M	Sequ2113BAC	H	H	B	H	H	H	H	B	H	B	B	H	H	B	B	H	H	H	B	H	H	H	B	H	B	H	B	H	B	H	B	B	B	B	B	B	H	H	H	B	B	B	H	B	H	H	H	B
Squ1M	Sequ03524SNP	H	H	B	H	H	H	H	B	H	B	B	H	H	B	B	H	H	H	B	H	H	H	B	H	B	H	B	H	B	H	B	B	B	B	B	B	H	H	H	B	B	B	H	B	H	H	H	B
Squ1M	Sequ3293BAC	H	H	B	B	H	H	H	B	H	B	B	H	H	B	B	H	H	H	B	H	H	H	B	H	B	H	B	H	B	H	B	B	B	B	B	B	H	H	H	B	B	B	H	B	H	H	H	B
Squ1M	Sequ1261BAC	H	H	B	B	H	H	H	B	H	B	B	H	H	B	B	H	H	H	B	H	B	H	B	H	B	H	B	H	B	H	B	B	B	B	B	B	H	H	H	B	B	B	H	B	H	H	H	B
Squ1M	Sequ3013BAC	H	H	B	B	H	H	H	B	H	B	B	H	H	B	B	H	H	H	B	H	B	H	B	H	B	H	B	H	B	H	B	B	B	B	B	B	H	H	H	B	B	B	H	B	H	H	H	B
Squ1M	Sequ2793BAC	H	H	B	B	H	H	H	B	H	B	B	H	H	B	B	H	H	H	B	H	B	H	B	H	B	H	B	H	B	H	B	B	B	B	B	B	H	H	H	B	B	B	H	B	H	H	H	B
Squ1M	Sequ0117BAC	H	H	B	B	H	H	H	B	H	B	B	H	H	B	B	H	H	H	B	B	B	H	B	H	B	H	B	H	B	H	B	B	B	B	B	B	H	H	H	B	B	B	H	B	H	H	H	B
Squ1M	Sequ0045TUF	H	H	B	B	H	H	H	B	H	B	H	H	H	B	B	H	H	H	B	B	H	H	B	H	B	H	B	H	B	H	B	B	B	B	B	B	H	H	H	B	B	B	H	B	H	H	H	B
Squ1M	Sequ1710BAC	H	H	B	B	H	H	H	B	B	B	H	H	B	B	B	H	H	H	B	B	H	H	H	H	B	H	B	H	B	H	B	B	B	B	B	B	H	H	H	B	B	B	H	B	H	H	H	B
Squ1M	Sequ0118TUF	H	H	B	B	H	H	H	B	B	B	H	H	B	B	B	H	H	H	B	B	H	H	H	H	B	H	B	H	B	H	B	B	B	B	B	B	H	H	H	B	B	B	H	B	H	H	H	B
Squ1M	Sequ0975TUF	H	H	B	B	H	H	H	B	B	B	H	H	B	B	B	H	H	H	B	B	H	H	H	H	B	H	B	H	B	H	B	B	B	B	B	B	H	H	H	B	B	B	H	B	H	H	H	B
Squ1M	Sequ0821TUF	H	H	B	B	H	H	H	B	B	B	H	H	B	B	B	H	H	B	B	B	H	H	H	H	B	H	B	H	B	H	B	B	B	B	B	B	H	H	H	B	B	B	H	B	H	H	H	B
Squ1M	Sequ1032TUF	H	H	B	B	H	H	H	B	B	B	H	H	B	B	B	H	H	B	B	B	H	H	H	H	B	H	B	H	B	H	B	B	B	B	B	B	H	H	H	B	B	B	H	B	H	H	B	B
Squ1M	Sequ0458BAC	H	H	B	B	H	H	H	B	B	B	H	H	B	B	B	H	H	B	B	B	H	H	H	H	B	H	B	H	B	H	B	B	B	B	B	B	H	H	H	B	B	B	H	B	H	H	B	B
Squ1M	Sequ1290BAC	H	H	B	B	H	H	B	B	B	B	H	H	B	B	B	H	H	B	B	B	H	H	H	H	H	H	H	H	B	H	B	H	B	B	B	B	H	H	B	H	B	B	H	B	H	H	B	B
Squ1M	Sequ0437TUF	H	H	B	B	H	H	B	B	B	B	H	H	B	B	B	H	H	B	B	B	H	H	H	H	H	H	H	H	B	H	B	H	B	H	B	B	H	H	B	H	B	B	H	B	H	H	B	B
Squ1M	Sequ0445TUF	H	H	B	B	H	H	B	B	B	B	H	H	B	B	B	H	H	B	B	B	H	H	H	H	H	H	H	H	B	H	B	H	B	H	B	B	H	H	B	H	B	B	H	B	H	H	B	B
Squ1M	Sequ0302TUF	H	B	B	B	H	H	B	B	B	B	H	H	B	B	B	B	H	B	B	B	H	H	H	H	H	H	H	H	B	H	B	H	B	H	B	B	H	H	B	H	B	B	H	B	H	H	B	B
Squ1M	Sequ0839TUF	H	B	B	B	H	H	B	B	B	B	H	H	B	B	B	B	H	B	B	B	H	H	H	H	H	H	H	H	B	H	B	H	B	H	B	B	H	H	B	H	B	B	H	B	H	H	B	B
Squ1M	Sequ0057TUF	H	B	B	B	H	H	B	B	B	B	H	H	B	B	B	B	H	B	B	B	H	H	H	H	H	H	H	H	B	H	B	H	B	H	B	B	H	H	B	H	B	B	H	B	B	B	B	H
Squ1M	Sequ0769TUF	H	B	B	B	H	H	B	B	B	B	H	H	B	B	B	B	H	B	B	B	H	H	H	H	H	H	H	H	B	H	B	H	B	H	B	B	H	H	B	H	B	B	H	B	B	B	B	H
Squ1M	Sequ04434SNP	H	B	B	B	H	H	B	B	B	B	H	H	B	B	-	B	H	B	B	B	H	H	H	H	H	H	H	H	B	H	B	H	B	H	B	B	H	H	B	H	B	B	H	B	B	B	B	H
Squ2M	Sequ0066TUF	B	B	B	H	H	H	B	B	B	B	H	H	B	H	B	H	H	B	H	H	B	H	B	H	H	B	B	B	H	H	H	H	H	B	B	B	H	B	H	B	H	B	B	B	B	B	B	H
Squ2M	Sequ0125TUF	B	B	B	H	H	H	B	B	B	B	H	H	B	H	B	H	H	B	H	H	B	H	B	H	H	B	B	B	H	H	H	H	H	B	B	B	H	B	H	B	H	B	B	B	B	B	B	H
Squ2M	Sequ0172TUF	B	B	B	H	H	H	B	B	B	B	H	H	B	H	B	H	H	B	H	H	B	H	B	H	H	B	B	B	H	H	H	H	H	B	B	B	H	B	H	B	H	B	B	B	B	B	B	H
Squ2M	Sequ0174TUF	B	B	B	H	H	H	B	B	B	B	H	H	B	H	B	H	H	B	H	H	B	H	B	H	H	B	B	B	H	H	H	H	H	B	B	B	H	B	H	B	H	B	B	B	B	B	B	H
Squ2M	Sequ0225TUF	B	B	B	H	H	H	B	B	B	B	H	H	B	H	B	H	H	B	H	H	B	H	B	H	H	B	B	B	H	H	H	H	H	B	B	B	H	B	H	B	H	B	B	B	B	B	B	H
Squ2M	Sequ0261TUF	B	B	B	H	H	H	B	B	B	B	H	H	B	H	B	H	H	B	H	H	B	H	B	H	H	B	B	B	H	H	H	H	H	B	B	B	H	B	H	B	H	B	B	B	B	B	B	H
Squ2M	Sequ0546TUF	B	B	B	H	H	H	B	B	B	B	H	H	B	H	B	H	H	B	H	H	B	H	B	H	H	B	B	B	H	H	H	H	H	B	B	B	H	B	H	B	H	B	B	B	B	B	B	H
Squ2M	Sequ0549TUF	B	B	B	H	H	H	B	B	B	B	H	H	B	H	B	H	H	B	H	H	B	H	B	H	H	B	B	B	H	H	H	H	H	B	B	B	H	B	H	B	H	B	B	B	B	B	B	H
Squ2M	Sequ0648TUF	B	B	B	H	H	H	B	B	B	B	H	H	B	H	B	H	H	B	H	H	B	H	B	H	H	B	B	B	H	H	H	H	H	B	B	B	H	B	H	B	H	B	B	B	B	B	B	H
Squ2M	Sequ0672TUF	B	B	B	H	H	H	B	B	B	B	H	H	B	H	B	H	H	B	H	H	B	H	B	H	H	B	B	B	H	H	H	H	H	B	B	B	H	B	H	B	H	B	B	B	B	B	B	H
Squ2M	Sequ0785TUF	B	B	B	H	H	H	B	B	B	B	H	H	B	H	B	H	H	B	H	H	B	H	B	H	H	B	B	B	H	H	H	H	H	B	B	B	H	B	H	B	H	B	B	B	B	B	B	H
Squ2M	Sequ0827TUF	B	B	B	H	H	H	B	B	B	B	H	H	B	H	B	H	H	B	H	H	B	H	B	H	H	B	B	B	H	H	H	H	H	B	B	B	H	B	H	B	H	B	B	B	B	B	B	H
Squ2M	Sequ0828TUF	B	B	B	H	H	H	B	B	B	B	H	H	B	H	B	H	H	B	H	H	B	H	B	H	H	B	B	B	H	H	H	H	H	B	B	B	H	B	H	B	H	B	B	B	B	B	B	H
Squ2M	Sequ0832TUF	B	B	B	H	H	H	B	B	B	B	H	H	B	H	B	H	H	B	H	H	B	H	B	H	H	B	B	B	H	H	H	H	H	B	B	B	H	B	H	B	H	B	B	B	B	B	B	H
Squ2M	Sequ1026TUF	B	B	B	H	H	H	B	B	B	B	H	H	B	H	B	H	H	B	H	H	B	H	B	H	H	B	B	B	H	H	H	H	H	B	B	B	H	B	H	B	H	B	B	B	B	B	B	H
Squ2M	Sequ1066TUF	B	B	B	H	H	H	B	B	B	B	H	H	B	H	B	H	H	B	H	H	B	H	B	H	H	B	B	B	H	H	H	H	H	B	B	B	H	B	H	B	H	B	B	B	B	B	B	H
Squ2M	Sequ1070TUF	B	B	B	H	H	H	B	B	B	B	H	H	B	H	B	H	H	B	H	H	B	H	B	H	H	B	B	B	H	H	H	H	H	B	B	B	H	B	H	B	H	B	B	B	B	B	B	H
Squ2M	Sequ0171BAC	B	B	B	H	H	H	B	B	B	B	H	H	B	H	B	H	H	B	H	H	B	H	B	H	H	B	B	B	H	H	H	H	H	B	B	B	H	B	H	B	H	B	B	B	B	B	B	H
Squ2M	Sequ0962BAC	B	B	B	H	H	H	B	B	B	B	H	H	B	H	B	H	H	B	H	H	B	H	B	H	H	B	B	B	H	H	H	H	H	B	B	B	H	B	H	B	H	B	B	B	B	B	B	H
Squ2M	Sequ0979BAC	B	B	B	H	H	H	B	B	B	B	H	H	B	H	B	H	H	B	H	H	B	H	B	H	H	B	B	B	H	H	H	H	H	B	B	B	H	B	H	B	H	B	B	B	B	B	B	H
Squ2M	Sequ1717BAC	B	B	B	H	H	H	B	B	B	B	H	H	B	H	B	H	H	B	H	H	B	H	B	H	H	B	B	B	H	H	H	H	H	B	B	B	H	B	H	B	H	B	B	B	B	B	B	H
Squ2M	Sequ1776BAC	B	B	B	H	H	H	B	B	B	B	H	H	B	H	B	H	H	B	H	H	B	H	B	H	H	B	B	B	H	H	H	H	H	B	B	B	H	B	H	B	H	B	B	B	B	B	B	H
Squ2M	Sequ1837BAC	B	B	B	H	H	H	B	B	B	B	H	H	B	H	B	H	H	B	H	H	B	H	B	H	H	B	B	B	H	H	H	H	H	B	B	B	H	B	H	B	H	B	B	B	B	B	B	H
Squ2M	Sequ3121BAC	B	B	B	H	H	H	B	B	B	B	H	H	B	H	B	H	H	B	H	H	B	H	B	H	H	B	B	B	H	H	H	H	H	B	B	B	H	B	H	B	H	B	B	B	B	B	B	H
Squ2M	Sequ02353SNP	B	B	B	H	H	H	B	B	B	B	H	H	B	H	B	H	H	B	H	H	B	H	B	H	H	B	B	B	H	H	H	H	H	B	B	B	H	B	H	B	H	B	B	B	B	B	B	H
Squ2M	Sequ0603TUF	B	B	B	H	H	H	B	B	B	B	H	H	B	H	B	H	H	B	H	H	B	H	B	H	H	B	B	B	H	H	H	H	H	B	B	B	H	B	H	B	H	B	B	B	B	B	B	H
Squ2M	Sequ0509BAC	B	B	B	H	H	H	B	B	B	B	H	H	B	H	B	H	H	B	H	H	B	H	B	H	H	B	B	B	H	H	H	H	H	B	B	B	H	B	H	B	H	B	B	B	B	B	B	H
Squ2M	Sequ3189BAC	B	B	B	H	H	H	B	B	B	B	H	H	B	H	B	H	H	B	H	H	B	H	B	H	H	B	B	B	H	H	H	H	H	B	B	B	H	B	H	B	H	B	B	B	B	B	B	H
Squ2M	Sequ0198TUF	B	B	B	H	H	H	B	B	B	B	H	H	B	H	B	H	H	B	H	H	B	H	B	H	H	B	B	B	H	H	H	H	H	B	B	B	H	H	H	B	H	B	B	B	B	B	B	H
Squ2M	Sequ0767TUF	B	B	B	H	H	H	B	B	B	B	H	H	B	H	B	H	H	B	H	H	B	H	B	H	H	B	B	B	H	H	H	H	H	B	B	B	H	H	H	B	H	B	B	B	B	B	B	H
Squ2M	Sequ0881TUF	B	B	B	H	H	H	B	B	B	B	H	H	B	H	B	H	H	B	H	H	B	H	B	H	H	B	B	B	H	H	H	H	H	B	B	B	H	H	H	B	H	B	B	B	B	B	B	H
Squ2M	Sequ0247TUF	B	B	B	H	H	H	B	B	B	B	H	H	B	H	B	H	H	B	H	H	B	H	B	H	H	B	B	B	H	H	H	H	H	B	B	B	H	H	H	B	H	B	B	H	B	B	B	H
Squ2M	Sequ1547BAC	B	B	B	H	H	H	B	B	B	B	H	H	B	H	B	H	H	B	H	H	B	H	B	H	H	B	B	B	H	H	H	H	H	B	B	B	H	H	H	B	H	B	B	H	B	B	B	H
Squ2M	Sequ2216BAC	B	B	B	H	H	H	B	B	B	B	H	H	B	H	B	H	H	B	H	H	B	H	H	H	H	B	B	B	H	H	H	H	H	B	B	B	H	H	H	B	H	B	B	H	B	B	B	H
Squ2M	Sequ0020TUF	B	B	B	H	H	H	B	B	B	B	H	H	B	H	B	H	H	B	H	H	B	H	H	H	H	B	B	B	H	H	B	H	H	B	B	B	H	H	H	B	H	B	B	H	B	B	B	H
Squ2M	Sequ0843TUF	B	B	B	H	H	H	B	B	B	B	H	H	B	H	B	H	H	B	H	H	B	H	H	H	H	B	B	B	H	H	B	H	H	B	B	B	H	H	H	B	H	B	B	H	B	B	B	H
Squ2M	Sequ0889TUF	H	B	B	H	H	H	B	B	B	B	H	H	B	H	B	H	B	B	H	H	B	H	H	H	H	B	B	B	H	H	B	H	H	B	B	B	H	H	H	B	H	B	B	H	B	B	B	H
Squ2M	Sequ0056BAC	H	B	B	H	H	H	B	B	B	B	H	H	B	H	B	H	B	B	H	H	B	H	H	H	H	B	B	B	H	H	B	H	H	B	B	B	H	H	H	H	H	B	B	H	B	B	B	H
Squ2M	Sequ0941TUF	H	B	B	H	H	H	B	B	B	B	H	H	B	H	B	H	B	B	H	H	B	H	H	H	H	B	B	B	H	H	B	H	H	B	B	B	H	H	H	H	H	B	B	H	B	B	B	H
Squ2M	Sequ02708SNP	H	B	B	H	H	H	B	B	B	B	H	H	B	H	B	H	B	B	H	H	B	H	H	H	B	B	B	B	H	H	B	H	H	B	B	B	H	H	H	H	H	B	B	H	B	B	B	H
Squ2M	Sequ0688BAC	H	B	B	B	H	H	B	B	B	B	H	H	B	B	B	H	B	B	H	H	B	H	H	H	B	B	B	B	H	H	B	H	H	B	B	B	H	H	H	H	H	B	B	H	B	B	B	H
Squ2M	Sequ1665BAC	H	B	B	B	H	H	B	B	B	B	H	H	B	B	B	H	B	B	H	H	B	H	H	H	B	B	B	B	H	H	B	H	H	B	B	B	H	H	H	H	H	B	B	H	B	B	B	H
Squ2M	Sequ1334BAC	H	B	B	B	H	H	B	B	B	B	H	H	B	B	B	H	B	B	H	H	B	H	H	H	B	B	B	B	H	H	B	B	H	B	B	B	H	H	H	H	H	B	B	H	B	B	B	H
Squ2M	Sequ0232TUF	H	B	B	B	H	H	B	B	B	B	H	H	B	B	B	B	B	B	H	H	B	H	H	H	B	B	B	B	H	H	B	B	H	B	B	B	H	H	H	H	H	H	B	H	B	B	B	H
Squ2M	Sequ0575TUF	H	B	B	B	H	H	B	B	B	B	H	H	B	B	B	B	B	B	H	H	B	H	H	H	B	B	B	B	H	H	B	B	H	B	B	B	H	H	H	H	H	H	B	H	B	B	B	H
Squ2M	Sequ0254TUF	H	B	B	B	H	H	B	B	B	B	H	H	B	B	B	B	B	B	H	H	B	H	H	H	B	B	B	B	H	H	B	B	H	B	B	B	H	H	H	H	H	H	B	H	B	B	B	H
Squ2M	Sequ0356BAC	H	B	B	B	H	H	B	B	B	B	H	H	B	B	B	B	B	B	H	H	B	B	H	H	B	B	B	B	H	H	B	B	H	B	B	B	H	H	H	H	H	H	B	H	B	B	B	B
Squ2M	Sequ1771BAC	H	B	B	B	H	H	B	B	B	B	H	H	B	B	B	B	B	B	H	H	B	B	H	H	B	B	B	B	H	H	B	B	H	B	B	B	H	H	H	H	H	H	B	H	B	B	B	B
Squ2M	Sequ1797BAC	H	B	B	B	H	H	B	B	B	B	H	H	B	B	B	B	B	B	H	H	B	B	H	H	B	B	B	B	H	H	B	B	H	B	B	B	H	H	H	H	H	H	B	H	B	B	B	B
Squ2M	Sequ0046BAC	H	B	B	B	H	H	B	B	B	B	H	H	B	B	B	B	B	B	H	B	B	B	H	H	B	B	B	B	H	H	B	B	H	B	B	B	H	H	H	H	H	H	B	H	B	B	B	B
Squ2M	Sequ0552TUF	H	B	B	B	H	H	B	B	B	B	H	H	B	B	B	B	B	B	H	B	B	B	H	H	B	B	B	B	H	H	B	B	H	B	B	B	H	H	H	H	H	H	B	H	B	B	B	B
Squ2M	Sequ0202TUF	H	B	B	B	H	H	B	B	B	B	H	H	B	B	B	B	B	B	H	B	B	B	H	H	B	B	B	B	H	H	B	B	H	B	B	B	H	H	H	H	H	H	B	H	B	B	B	B
Squ2M	Sequ0718TUF	H	B	B	B	H	B	B	B	B	B	H	H	B	B	B	B	B	B	B	B	B	B	H	H	B	B	B	B	H	H	B	B	H	B	B	B	H	H	H	H	H	H	B	H	B	B	B	B
Squ3M	Sequ0403TUF	H	B	B	B	B	H	B	B	B	B	B	B	H	B	H	H	B	H	B	B	H	B	H	H	B	H	B	H	H	H	H	B	B	H	H	H	H	B	B	B	H	H	H	B	B	B	B	B
Squ3M	Sequ1086BAC	H	B	B	B	B	H	B	B	B	B	B	B	H	B	H	H	B	H	B	B	H	B	H	H	B	H	B	H	H	H	H	B	B	H	H	H	H	H	B	B	H	H	H	B	B	B	B	B
Squ3M	Sequ2028BAC	H	B	B	B	B	H	B	B	B	B	B	B	H	B	H	H	B	H	B	B	H	B	H	H	B	H	B	H	H	H	H	B	B	H	H	H	H	H	B	B	H	H	H	B	B	B	B	B
Squ3M	Sequ0858TUF	H	B	B	B	B	H	B	B	B	B	B	B	H	B	H	H	B	H	B	B	H	B	H	H	B	H	B	H	H	H	H	B	B	H	H	H	H	H	B	B	H	H	B	B	B	B	B	B
Squ3M	Sequ0558BAC	H	B	B	B	B	H	B	B	B	B	B	B	H	B	B	H	H	B	B	B	H	B	H	H	B	B	B	H	H	H	H	B	B	H	H	H	H	H	H	B	H	H	B	B	B	B	B	B
Squ3M	Sequ0047BAC	B	B	B	B	B	B	B	B	B	H	B	B	H	H	B	H	H	B	H	B	H	B	H	H	B	B	B	B	H	H	H	B	B	H	H	H	H	H	H	B	H	B	B	B	B	B	B	B
Squ3M	Sequ0956TUF	B	B	H	B	B	B	B	B	B	H	B	B	H	H	B	B	H	B	H	B	H	B	H	H	B	B	B	B	H	B	H	B	B	H	H	H	H	H	H	B	B	B	B	B	H	B	B	B
Squ3M	Sequ1666BAC	B	B	H	B	B	B	B	B	B	H	B	B	H	H	B	B	H	B	H	B	H	B	H	H	B	B	B	B	H	B	H	B	B	H	H	H	H	H	H	B	B	B	B	B	H	B	B	B
Squ3M	Sequ0557TUF	B	B	H	B	B	B	B	B	B	H	B	B	H	H	B	B	H	B	H	B	H	B	H	H	B	B	B	B	H	B	H	B	B	H	H	H	H	H	H	H	B	B	B	B	H	B	B	B
Squ3M	Sequ0019TUF	B	B	H	B	B	B	B	B	B	H	B	B	H	H	B	B	H	B	H	B	H	B	H	H	B	B	B	B	H	B	H	B	B	H	H	H	H	H	H	H	B	B	B	B	H	B	B	B
Squ3M	Sequ0040TUF	B	H	H	B	B	B	B	B	B	H	B	B	H	H	B	B	H	B	H	B	H	B	H	H	B	B	B	B	H	B	H	B	B	H	H	H	H	H	H	H	B	B	B	B	H	B	B	B
Squ3M	Sequ1981BAC	B	H	H	B	B	B	B	B	B	H	B	B	H	H	B	B	H	B	H	B	H	B	H	H	B	B	B	B	H	B	H	B	B	H	H	H	H	H	H	H	B	B	B	B	H	B	B	B
Squ3M	Sequ0675TUF	B	H	H	B	B	B	B	B	B	H	B	B	H	H	B	B	H	B	H	B	H	B	H	H	B	B	B	B	H	B	B	B	B	H	H	H	H	H	H	H	B	B	B	B	H	B	B	B
Squ3M	Sequ1859BAC	B	H	H	B	B	B	B	B	B	H	B	B	H	H	B	B	H	B	H	B	H	B	H	H	B	B	B	B	H	B	B	B	B	H	H	H	H	H	H	H	B	B	B	B	H	B	B	B
Squ3M	Sequ2986BAC	B	H	H	B	B	B	B	B	B	H	B	B	H	H	B	B	H	B	H	B	H	B	H	H	B	B	B	B	H	B	B	B	B	H	H	H	H	H	H	H	B	B	B	B	H	B	B	B
Squ3M	Sequ0079TUF	B	H	H	B	B	B	B	B	B	H	B	B	H	H	B	B	H	B	H	B	H	B	H	H	B	B	B	B	H	B	B	B	B	H	H	H	H	H	H	H	B	B	B	B	H	B	B	B
Squ3M	Sequ0110TUF	B	H	H	B	B	B	B	B	B	H	B	B	H	H	B	B	H	B	H	B	H	B	H	H	B	B	B	B	H	B	B	B	B	H	H	H	H	H	H	H	B	B	B	B	H	B	B	B
Squ3M	Sequ0582BAC	B	H	H	B	B	B	B	B	B	H	B	B	H	H	B	B	H	B	H	H	H	B	H	H	B	B	B	B	H	B	B	H	B	H	H	H	H	H	H	H	B	B	B	B	H	B	B	B
Squ3M	Sequ2611BAC	B	H	H	B	B	B	B	B	B	H	B	B	H	H	B	B	H	B	H	H	H	B	H	H	B	B	B	B	H	B	B	H	B	H	H	H	H	H	H	H	B	B	B	B	H	B	B	B
Squ3M	Sequ0103TUF	B	H	H	B	B	B	B	B	B	H	B	B	H	H	B	B	H	B	H	H	H	B	H	H	B	B	B	B	H	B	B	H	B	B	H	H	H	B	H	H	B	B	B	B	H	B	B	B
Squ3M	Sequ0208TUF	B	H	H	B	B	B	B	B	B	H	B	B	H	H	B	B	H	B	H	H	H	B	H	H	B	B	B	B	H	B	B	H	B	B	H	H	H	B	H	H	B	B	B	B	H	B	B	B
Squ3M	Sequ0233TUF	B	H	H	B	B	B	B	B	B	H	B	B	H	H	B	B	H	B	H	H	H	B	H	H	B	B	B	B	H	B	B	H	B	B	H	H	H	B	H	H	B	B	B	B	H	B	B	B
Squ3M	Sequ0619TUF	B	H	H	B	B	B	B	B	B	H	B	B	H	H	B	B	H	B	H	H	H	B	H	H	B	B	B	B	H	B	B	H	B	B	H	H	H	B	H	H	B	B	B	B	H	B	B	B
Squ3M	Sequ0878TUF	B	H	H	B	B	B	B	B	B	H	B	B	H	H	B	B	H	B	H	H	H	B	H	H	B	B	B	B	H	B	B	H	B	B	H	H	H	B	H	H	B	B	B	B	H	B	B	B
Squ3M	Sequ0887TUF	B	H	H	B	B	B	B	B	B	H	B	B	H	H	B	B	H	B	H	H	H	B	H	H	B	B	B	B	H	B	B	H	B	B	H	H	H	B	H	H	B	B	B	B	H	B	B	B
Squ3M	Sequ0966BAC	B	H	H	B	B	B	B	B	B	H	B	B	H	H	B	B	H	B	H	H	H	B	H	H	B	B	B	B	H	B	B	H	B	B	H	H	H	B	H	H	B	B	B	B	H	B	B	B
Squ3M	Sequ1081BAC	B	H	H	B	B	B	B	B	B	H	B	B	H	H	B	B	H	B	H	H	H	B	H	H	B	B	B	B	H	B	B	H	B	B	H	H	H	B	H	H	B	B	B	B	H	B	B	B
Squ3M	Sequ3062BAC	B	H	H	B	B	B	B	B	B	H	B	B	H	H	B	B	H	B	H	H	H	B	H	H	B	B	B	B	H	B	B	H	B	B	H	H	H	B	H	H	B	B	B	B	H	B	B	B
Squ3M	Sequ0740TUF	B	H	H	B	B	B	B	B	H	H	B	B	H	H	B	B	H	B	H	H	H	B	H	H	B	B	B	B	H	B	B	H	B	B	H	H	H	B	H	H	B	B	B	B	H	B	B	B
Squ4M	Sequ0049TUF	B	B	H	B	H	B	B	H	B	B	B	B	H	B	H	B	H	B	B	B	H	H	B	H	B	H	B	H	B	H	H	H	B	B	H	B	H	H	H	B	H	B	H	H	H	H	H	B
Squ4M	Sequ0869TUF	B	B	H	B	H	B	B	H	B	B	B	B	H	B	H	B	H	B	B	B	H	H	B	H	B	H	B	H	B	H	H	H	B	B	H	B	H	H	H	B	H	B	H	H	H	H	H	B
Squ4M	Sequ0879TUF	B	B	H	B	H	B	B	H	B	B	B	B	H	B	H	B	H	B	B	B	H	H	B	H	B	H	B	H	B	H	H	H	B	B	H	B	H	H	H	B	H	B	H	H	H	H	H	B
Squ4M	Sequ0960TUF	B	B	H	B	H	B	B	H	B	B	B	B	H	B	H	B	H	B	B	B	H	H	B	H	B	H	B	H	B	H	H	H	B	B	H	B	H	H	H	B	H	B	H	H	H	H	H	B
Squ4M	Sequ1500BAC	B	B	H	B	H	B	B	H	B	B	B	B	H	B	H	B	H	B	B	B	H	H	B	H	B	H	B	H	B	H	H	H	B	B	H	B	H	H	H	B	H	B	H	H	H	H	H	B
Squ4M	Sequ1624BAC	B	B	H	B	H	B	B	H	B	B	B	B	H	B	H	B	H	B	B	B	H	H	B	H	B	H	B	H	B	H	H	H	B	B	H	B	H	H	H	B	H	B	H	H	H	H	H	B
Squ4M	Sequ03932SNP	B	B	H	B	H	B	B	H	B	B	B	B	H	B	H	B	H	B	B	B	H	H	B	H	B	H	B	H	B	H	H	H	B	B	H	B	H	H	H	B	H	B	H	H	H	H	H	B
Squ4M	Sequ0548BAC	B	B	H	B	H	B	B	H	B	B	B	B	H	B	H	B	H	B	B	B	H	H	B	B	B	H	B	H	B	H	H	H	B	B	H	B	H	H	H	B	H	B	H	H	H	H	H	B
Squ4M	Sequ1307BAC	B	B	H	B	H	B	B	H	B	B	B	B	H	B	H	B	H	B	B	B	H	H	B	B	B	H	B	H	B	H	H	H	B	B	H	B	H	H	H	B	H	B	H	H	H	H	H	B
Squ4M	Sequ2442BAC	B	B	H	B	H	B	B	H	B	B	B	B	H	B	H	B	H	B	B	B	H	H	B	B	B	H	B	H	B	H	H	H	B	B	H	B	H	H	H	B	H	B	H	H	H	H	H	B
Squ4M	Sequ2739BAC	B	B	H	B	H	B	B	H	B	B	B	B	H	B	H	B	H	B	B	B	H	H	B	B	B	H	B	H	B	H	H	H	B	B	H	B	H	H	H	B	H	B	H	H	H	H	H	B
Squ4M	Sequ0250TUF	B	B	H	B	H	B	B	H	B	B	B	B	B	B	H	B	H	B	B	B	H	H	B	B	B	H	B	H	B	H	H	H	B	B	H	B	H	H	H	B	H	B	H	H	H	H	H	B
Squ4M	Sequ0412TUF	B	B	H	B	H	B	B	H	B	B	B	B	B	B	H	B	H	B	B	B	H	H	B	B	B	H	B	H	B	H	H	H	B	B	H	B	H	H	H	B	H	B	H	H	H	H	H	B
Squ4M	Sequ0413TUF	B	B	H	B	H	B	B	H	B	B	B	B	B	B	H	B	H	B	B	B	H	H	B	B	B	H	B	H	B	H	H	H	B	B	H	B	H	H	H	B	H	B	H	H	H	H	H	B
Squ4M	Sequ0541TUF	B	B	H	B	H	B	B	H	B	B	B	B	B	B	H	B	H	B	B	B	H	H	B	B	B	H	B	H	B	H	H	H	B	B	H	B	H	H	H	B	H	B	H	H	H	H	H	B
Squ4M	Sequ0902TUF	B	B	H	B	H	B	B	H	B	B	B	B	B	B	H	B	H	B	B	B	H	H	B	B	B	H	B	H	B	H	H	H	B	B	H	B	H	H	H	B	H	B	H	H	H	H	H	B
Squ4M	Sequ0962TUF	B	B	H	B	H	B	B	H	B	B	B	B	B	B	H	B	H	B	B	B	H	H	B	B	B	H	B	H	B	H	H	H	B	B	H	B	H	H	H	B	H	B	H	H	H	H	H	B
Squ4M	Sequ0169BAC	B	B	H	B	H	B	B	H	B	B	B	B	B	B	H	B	H	B	B	B	H	H	B	B	B	H	B	H	B	H	H	H	B	B	H	B	H	H	H	B	H	B	H	H	H	H	H	B
Squ4M	Sequ0946BAC	B	B	H	B	H	B	B	H	B	B	B	B	B	B	H	B	H	B	B	B	H	H	B	B	B	H	B	H	B	H	H	H	B	B	H	B	H	H	H	B	H	B	H	H	H	H	H	B
Squ4M	Sequ1217BAC	B	B	H	B	H	B	B	H	B	B	B	B	B	B	H	B	H	B	B	B	H	H	B	B	B	H	B	H	B	H	H	H	B	B	H	B	H	H	H	B	H	B	H	H	H	H	H	B
Squ4M	Sequ1276BAC	B	B	H	B	H	B	B	H	B	B	B	B	B	B	H	B	H	B	B	B	H	H	B	B	B	H	B	H	B	H	H	H	B	B	H	B	H	H	H	B	H	B	H	H	H	H	H	B
Squ4M	Sequ1572BAC	B	B	H	B	H	B	B	H	B	B	B	B	B	B	H	B	H	B	B	B	H	H	B	B	B	H	B	H	B	H	H	H	B	B	H	B	H	H	H	B	H	B	H	H	H	H	H	B
Squ4M	Sequ1957BAC	B	B	H	B	H	B	B	H	B	B	B	B	B	B	H	B	H	B	B	B	H	H	B	B	B	H	B	H	B	H	H	H	B	B	H	B	H	H	H	B	H	B	H	H	H	H	H	B
Squ4M	Sequ2224BAC	B	B	H	B	H	B	B	H	B	B	B	B	B	B	H	B	H	B	B	B	H	H	B	B	B	H	B	H	B	H	H	H	B	B	H	B	H	H	H	B	H	B	H	H	H	H	H	B
Squ4M	Sequ3093BAC	B	B	H	B	H	B	B	H	B	B	B	B	B	B	H	B	H	B	B	B	H	H	B	B	B	H	B	H	B	H	H	H	B	B	H	B	H	H	H	B	H	B	H	H	H	H	H	B
Squ4M	Sequ3244BAC	B	B	H	B	H	B	B	H	B	B	B	B	B	B	H	B	H	B	B	B	H	H	B	B	B	H	B	H	B	H	H	H	B	B	H	B	H	H	H	B	H	B	H	H	H	H	H	B
Squ4M	Sequ00571SNP	B	B	H	B	H	B	B	H	B	B	B	B	B	B	H	B	H	B	B	B	H	H	B	B	B	H	B	H	B	H	H	H	B	B	H	B	H	H	H	B	H	B	H	H	H	H	H	B
Squ5M	Sequ0229TUF	H	B	H	H	H	B	B	H	H	B	B	H	B	B	B	H	B	B	B	B	B	H	B	H	B	H	B	H	H	B	B	B	H	B	H	H	H	B	H	H	H	B	B	B	B	H	B	B
Squ5M	Sequ1154BAC	H	B	H	H	H	B	B	B	H	B	B	B	B	H	B	H	B	B	B	B	B	H	H	H	B	B	B	H	H	B	B	B	H	B	H	H	B	B	H	H	H	B	B	B	B	H	B	B
Squ5M	Sequ1573BAC	H	B	H	H	H	B	B	B	H	B	B	B	B	H	B	H	B	B	H	B	B	H	H	H	B	B	B	H	H	B	B	B	H	B	H	H	B	B	H	H	H	B	B	B	B	H	B	B
Squ5M	Sequ0807TUF	H	B	H	H	H	B	B	B	H	B	B	B	B	H	B	H	B	B	H	B	B	H	H	H	B	B	B	H	H	B	B	H	H	B	H	H	B	B	H	H	H	B	B	B	B	H	B	B
Squ5M	Sequ0705TUF	H	B	H	H	H	B	B	B	H	B	B	B	B	H	B	H	B	B	H	B	B	H	H	H	B	B	B	H	H	B	B	H	H	B	H	H	B	B	H	H	H	B	B	B	B	H	B	B
Squ5M	Sequ1982BAC	H	B	H	H	H	B	B	B	H	B	B	B	B	H	B	H	B	B	H	B	B	H	H	H	B	B	B	H	H	B	B	H	H	B	H	B	B	B	H	H	H	B	B	B	B	H	B	B
Squ5M	Sequ0306TUF	H	B	H	H	H	B	B	B	H	B	B	B	B	H	B	H	B	B	H	B	B	H	H	H	B	B	B	H	H	B	B	H	H	B	H	B	B	B	H	H	H	B	B	B	B	H	B	B
Squ5M	Sequ1111BAC	H	B	H	H	H	B	B	B	H	B	B	B	B	H	B	H	B	B	H	B	B	H	H	H	B	B	B	H	H	B	B	H	H	B	H	B	B	B	H	H	H	B	B	B	B	H	B	B
Squ5M	Sequ0702TUF	H	B	H	H	H	B	B	B	H	B	B	B	B	H	B	H	H	B	H	B	B	H	H	H	B	B	B	H	H	B	B	H	H	B	H	B	B	B	H	H	B	B	B	B	B	H	B	B
Squ5M	Sequ0219TUF	H	B	H	H	H	B	B	B	H	B	B	B	B	H	B	H	H	B	H	B	B	H	H	H	B	B	B	H	H	B	B	H	H	B	H	B	B	B	H	H	B	B	B	B	B	H	B	B
Squ5M	Sequ0068TUF	H	B	H	H	H	B	B	B	H	B	B	B	B	H	B	H	H	H	H	B	B	H	H	H	B	B	B	H	H	B	B	H	H	B	H	B	B	B	H	H	B	B	B	B	B	H	B	B
Squ5M	Sequ0592TUF	H	B	H	H	H	B	B	B	H	B	B	B	B	H	B	H	H	H	H	B	B	H	H	H	B	B	B	H	H	B	B	H	H	B	H	B	B	B	H	H	B	B	B	B	B	H	B	B
Squ5M	Sequ1793BAC	H	B	H	H	H	B	B	B	H	H	B	B	B	H	B	H	H	H	H	B	B	H	H	H	B	B	B	H	H	B	B	H	H	B	H	B	B	B	H	H	B	B	H	B	B	H	B	B
Squ5M	Sequ0315TUF	H	B	H	H	H	H	B	B	H	H	B	B	B	H	B	H	H	H	H	B	B	H	H	H	B	B	B	H	H	B	B	H	H	B	H	B	B	B	H	H	B	B	H	B	B	H	B	B
Squ5M	Sequ0722TUF	H	B	H	H	H	H	B	B	H	H	B	B	B	H	B	H	H	H	H	B	B	H	H	H	B	B	B	H	H	B	B	H	H	B	H	B	B	B	H	H	B	B	H	B	B	H	B	B
Squ5M	Sequ0110BAC	H	B	H	H	H	H	B	B	H	H	B	B	B	H	B	H	H	H	H	B	B	H	H	H	B	B	B	H	H	B	B	H	H	B	H	B	B	B	H	H	B	B	H	B	B	H	B	B
Squ5M	Sequ3289BAC	H	B	H	H	H	H	B	B	H	H	B	B	B	H	B	H	H	H	H	B	B	H	H	H	B	B	B	H	H	B	B	H	H	B	H	B	B	B	H	H	B	B	H	B	B	H	B	B
Squ5M	Sequ0188TUF	H	B	H	H	H	H	B	B	H	H	B	B	B	H	B	H	H	H	H	B	B	B	H	H	B	B	B	H	H	B	B	H	H	H	H	B	B	B	H	H	B	B	H	B	B	H	B	B
Squ5M	Sequ0044TUF	H	B	H	H	H	H	B	B	H	H	B	B	B	H	B	H	H	H	H	B	H	B	H	H	B	B	B	H	H	B	B	H	H	H	H	B	B	B	H	H	B	B	H	B	B	H	B	B
Squ5M	Sequ1040TUF	H	B	H	H	H	H	B	B	H	H	B	B	B	H	B	H	H	H	H	B	H	B	H	H	B	B	B	H	H	B	B	H	H	H	H	B	B	B	H	H	B	B	H	B	B	H	B	B
Squ5M	Sequ0903BAC	H	B	H	H	H	H	B	B	H	H	B	B	B	H	B	H	H	H	H	B	H	B	H	H	B	B	B	H	H	B	B	H	H	H	H	B	B	B	H	H	B	B	H	B	B	H	B	B
Squ5M	Sequ03532_1SNP	H	B	H	-	H	H	B	B	H	H	B	B	B	H	B	H	H	H	-	B	H	B	H	H	B	B	B	H	H	B	B	H	H	H	H	B	B	B	H	B	B	B	H	B	B	H	B	B
Squ5M	Sequ0512TUF	B	B	B	H	H	H	B	B	H	H	B	B	B	H	B	H	H	H	H	B	H	B	H	H	B	B	B	H	H	B	B	H	H	H	H	B	B	B	B	B	B	H	H	B	B	H	H	B
Squ5M	Sequ0542TUF	B	B	B	H	H	H	B	B	H	H	B	B	B	H	B	H	H	H	H	B	H	B	H	H	B	B	B	H	H	B	B	H	H	H	H	B	B	B	B	B	B	H	H	B	B	H	H	B
Squ5M	Sequ0571TUF	B	B	B	H	H	H	B	B	H	H	B	B	B	H	B	H	H	H	H	B	H	B	H	H	B	B	B	H	H	B	B	H	H	H	H	B	B	B	B	B	B	H	H	B	B	H	H	B
Squ5M	Sequ0604TUF	B	B	B	H	H	H	B	B	H	H	B	B	B	H	B	H	H	H	H	B	H	B	H	H	B	B	B	H	H	B	B	H	H	H	H	B	B	B	B	B	B	H	H	B	B	H	H	B
Squ5M	Sequ0721TUF	B	B	B	H	H	H	B	B	H	H	B	B	B	H	B	H	H	H	H	B	H	B	H	H	B	B	B	H	H	B	B	H	H	H	H	B	B	B	B	B	B	H	H	B	B	H	H	B
Squ5M	Sequ0777TUF	B	B	B	H	H	H	B	B	H	H	B	B	B	H	B	H	H	H	H	B	H	B	H	H	B	B	B	H	H	B	B	H	H	H	H	B	B	B	B	B	B	H	H	B	B	H	H	B
Squ5M	Sequ0860TUF	B	B	B	H	H	H	B	B	H	H	B	B	B	H	B	H	H	H	H	B	H	B	H	H	B	B	B	H	H	B	B	H	H	H	H	B	B	B	B	B	B	H	H	B	B	H	H	B
Squ5M	Sequ0970TUF	B	B	B	H	H	H	B	B	H	H	B	B	B	H	B	H	H	H	H	B	H	B	H	H	B	B	B	H	H	B	B	H	H	H	H	B	B	B	B	B	B	H	H	B	B	H	H	B
Squ5M	Sequ0999TUF	B	B	B	H	H	H	B	B	H	H	B	B	B	H	B	H	H	H	H	B	H	B	H	H	B	B	B	H	H	B	B	H	H	H	H	B	B	B	B	B	B	H	H	B	B	H	H	B
Squ5M	Sequ0087BAC	B	B	B	H	H	H	B	B	H	H	B	B	B	H	B	H	H	H	H	B	H	B	H	H	B	B	B	H	H	B	B	H	H	H	H	B	B	B	B	B	B	H	H	B	B	H	H	B
Squ5M	Sequ0387BAC	B	B	B	H	H	H	B	B	H	H	B	B	B	H	B	H	H	H	H	B	H	B	H	H	B	B	B	H	H	B	B	H	H	H	H	B	B	B	B	B	B	H	H	B	B	H	H	B
Squ5M	Sequ0668BAC	B	B	B	H	H	H	B	B	H	H	B	B	B	H	B	H	H	H	H	B	H	B	H	H	B	B	B	H	H	B	B	H	H	H	H	B	B	B	B	B	B	H	H	B	B	H	H	B
Squ5M	Sequ0931BAC	B	B	B	H	H	H	B	B	H	H	B	B	B	H	B	H	H	H	H	B	H	B	H	H	B	B	B	H	H	B	B	H	H	H	H	B	B	B	B	B	B	H	H	B	B	H	H	B
Squ5M	Sequ0957BAC	B	B	B	H	H	H	B	B	H	H	B	B	B	H	B	H	H	H	H	B	H	B	H	H	B	B	B	H	H	B	B	H	H	H	H	B	B	B	B	B	B	H	H	B	B	H	H	B
Squ5M	Sequ1174BAC	B	B	B	H	H	H	B	B	H	H	B	B	B	H	B	H	H	H	H	B	H	B	H	H	B	B	B	H	H	B	B	H	H	H	H	B	B	B	B	B	B	H	H	B	B	H	H	B
Squ5M	Sequ1668BAC	B	B	B	H	H	H	B	B	H	H	B	B	B	H	B	H	H	H	H	B	H	B	H	H	B	B	B	H	H	B	B	H	H	H	H	B	B	B	B	B	B	H	H	B	B	H	H	B
Squ5M	Sequ2483BAC	B	B	B	H	H	H	B	B	H	H	B	B	B	H	B	H	H	H	H	B	H	B	H	H	B	B	B	H	H	B	B	H	H	H	H	B	B	B	B	B	B	H	H	B	B	H	H	B
Squ5M	Sequ2690BAC	B	B	B	H	H	H	B	B	H	H	B	B	B	H	B	H	H	H	H	B	H	B	H	H	B	B	B	H	H	B	B	H	H	H	H	B	B	B	B	B	B	H	H	B	B	H	H	B
Squ5M	Sequ04666SNP	B	B	B	-	-	-	B	B	H	H	B	B	B	H	B	H	H	H	H	B	H	B	H	H	B	B	B	H	H	B	B	H	H	H	H	B	B	B	B	B	B	H	H	B	B	H	H	B
Squ6M	Sequ0656TUF	H	B	H	B	H	H	H	H	H	B	B	H	H	B	H	B	B	B	H	B	B	B	B	B	B	H	B	B	H	H	H	H	B	H	H	H	B	H	H	B	H	H	B	B	B	H	H	B
Squ6M	Sequ0813TUF	H	B	H	B	H	H	H	H	H	H	B	H	H	B	H	H	B	B	H	B	B	B	B	B	B	H	B	B	H	H	H	H	B	H	H	H	B	H	H	B	H	H	B	B	B	H	H	B
Squ6M	Sequ0168BAC	H	B	H	B	H	H	H	H	H	H	B	H	H	B	H	H	B	B	H	B	B	B	B	B	B	H	B	B	H	H	H	H	B	H	H	H	B	H	H	B	H	H	B	B	B	H	H	B
Squ6M	Sequ2694BAC	H	B	H	B	H	H	H	H	H	H	B	H	H	B	H	H	B	B	H	B	B	B	B	B	B	H	B	B	H	H	H	H	B	H	H	H	B	H	H	B	H	H	B	B	B	H	H	B
Squ6M	Sequ0515TUF	H	B	H	B	H	H	H	H	H	H	B	H	H	B	H	H	B	B	H	B	B	B	B	B	B	H	B	B	H	H	B	H	B	H	H	H	B	H	H	B	H	H	B	B	B	H	H	B
Squ6M	Sequ03283SNP	H	B	H	B	H	H	H	H	H	H	B	H	H	B	H	H	B	B	H	B	B	B	B	B	B	H	B	B	H	H	B	H	B	H	H	H	B	H	H	B	H	H	B	B	B	H	H	B
Squ6M	Sequ3298BAC	H	B	H	B	H	H	H	H	H	H	B	H	H	B	H	H	B	B	B	B	B	B	B	B	B	H	B	B	H	H	B	H	B	H	H	H	B	H	H	B	H	H	H	B	B	H	H	B
Squ6M	Sequ0642TUF	H	B	H	B	H	H	H	H	H	H	H	H	H	B	H	H	B	B	B	B	B	B	B	B	H	H	B	B	H	H	B	H	B	H	H	H	B	H	H	B	H	H	H	B	B	H	H	B
Squ6M	Sequ0138TUF	H	B	H	B	H	H	H	H	B	H	H	H	H	B	B	H	B	B	B	H	B	B	B	H	H	B	B	B	H	H	B	H	H	H	H	H	B	H	B	B	H	H	H	B	B	H	H	B
Squ6M	Sequ0432TUF	H	B	H	B	H	H	H	H	B	H	H	H	H	B	B	H	B	B	B	H	B	B	B	H	H	B	B	B	H	H	B	H	H	H	H	H	B	H	B	B	H	H	H	B	B	H	H	B
Squ6M	Sequ1000TUF	H	B	H	B	H	H	H	H	B	H	H	H	H	B	B	H	B	B	B	H	B	B	B	H	H	B	B	B	H	H	B	H	H	H	H	H	B	H	B	B	H	H	H	B	B	H	H	B
Squ6M	Sequ0856TUF	H	B	H	B	H	H	H	H	B	H	H	H	H	B	B	H	B	B	B	H	B	B	B	H	H	B	B	B	H	H	B	H	H	H	H	H	B	H	B	B	H	H	H	B	B	H	H	B
Squ6M	Sequ1868BAC	H	B	H	B	H	H	H	H	B	H	H	H	H	B	B	H	B	B	B	H	B	B	B	H	H	B	B	B	B	H	B	H	H	H	H	H	B	H	B	B	H	H	H	B	B	H	H	H
Squ6M	Sequ0617TUF	H	B	H	B	B	H	H	H	B	H	H	H	H	B	B	H	B	B	B	H	B	B	B	H	H	B	B	B	B	H	B	H	H	H	H	H	B	H	B	B	H	H	H	B	B	H	H	H
Squ6M	Sequ0930TUF	H	B	H	B	B	H	H	H	B	H	H	H	H	B	B	H	B	B	B	H	B	B	B	H	H	B	B	B	B	B	B	H	H	B	B	H	B	H	B	B	H	H	H	H	B	H	H	H
Squ6M	Sequ0003TUF	H	B	H	B	B	H	H	H	B	H	H	H	H	B	B	H	B	H	B	H	H	B	B	H	H	B	B	B	B	H	B	H	H	B	B	H	B	H	B	B	H	H	H	H	B	H	H	H
Squ6M	Sequ0140TUF	H	B	H	B	B	H	H	H	B	H	H	H	H	B	B	H	B	H	B	H	H	B	B	H	H	B	B	B	B	H	B	H	H	B	B	H	B	H	B	B	H	H	H	H	B	H	H	H
Squ6M	Sequ0414TUF	H	B	H	B	B	H	H	H	B	H	H	H	H	B	B	H	B	H	B	H	H	B	B	H	H	B	B	B	B	H	B	H	H	B	B	H	B	H	B	B	H	H	H	H	B	H	H	H
Squ6M	Sequ0511TUF	H	B	H	B	B	H	H	H	B	H	H	H	H	B	B	H	B	H	B	H	H	B	B	H	H	B	B	B	B	H	B	H	H	B	B	H	B	H	B	B	H	H	H	H	B	H	H	H
Squ6M	Sequ0526TUF	H	B	H	B	B	H	H	H	B	H	H	H	H	B	B	H	B	H	B	H	H	B	B	H	H	B	B	B	B	H	B	H	H	B	B	H	B	H	B	B	H	H	H	H	B	H	H	H
Squ6M	Sequ0671TUF	H	B	H	B	B	H	H	H	B	H	H	H	H	B	B	H	B	H	B	H	H	B	B	H	H	B	B	B	B	H	B	H	H	B	B	H	B	H	B	B	H	H	H	H	B	H	H	H
Squ6M	Sequ0862TUF	H	B	H	B	B	H	H	H	B	H	H	H	H	B	B	H	B	H	B	H	H	B	B	H	H	B	B	B	B	H	B	H	H	B	B	H	B	H	B	B	H	H	H	H	B	H	H	H
Squ6M	Sequ0153BAC	H	B	H	B	B	H	H	H	B	H	H	H	H	B	B	H	B	H	B	H	H	B	B	H	H	B	B	B	B	H	B	H	H	B	B	H	B	H	B	B	H	H	H	H	B	H	H	H
Squ6M	Sequ0400BAC	H	B	H	B	B	H	H	H	B	H	H	H	H	B	B	H	B	H	B	H	H	B	B	H	H	B	B	B	B	H	B	H	H	B	B	H	B	H	B	B	H	H	H	H	B	H	H	H
Squ6M	Sequ00611SNP	H	B	-	B	B	H	H	H	B	H	H	H	H	B	B	H	B	H	B	H	H	B	B	H	H	B	B	B	B	H	B	H	H	B	B	H	B	H	B	B	H	H	H	H	B	H	H	H
Squ7M	Sequ02553SNP	B	B	-	B	H	H	B	B	H	H	H	B	B	B	H	B	H	B	H	B	B	H	H	B	H	B	B	B	H	H	H	B	H	H	B	B	B	H	B	B	B	H	H	B	H	H	H	H
Squ7M	Sequ0416TUF	B	B	B	B	H	H	B	B	H	H	H	B	B	B	H	B	H	B	H	B	B	H	H	B	H	B	B	B	H	H	H	B	H	H	B	B	B	H	B	B	B	H	H	H	H	H	H	H
Squ7M	Sequ0553TUF	B	B	B	B	H	H	B	B	H	H	H	B	B	B	H	B	H	B	H	B	B	H	H	B	H	B	B	B	H	H	H	B	H	H	B	B	B	H	B	B	B	H	H	H	H	H	H	H
Squ7M	Sequ0581TUF	B	B	B	B	H	H	B	B	H	H	H	B	B	B	H	B	H	B	H	B	B	H	H	B	H	B	B	B	H	H	H	B	H	H	B	B	B	H	B	B	B	H	H	H	H	H	H	H
Squ7M	Sequ0584TUF	B	B	B	B	H	H	B	B	H	H	H	B	B	B	H	B	H	B	H	B	B	H	H	B	H	B	B	B	H	H	H	B	H	H	B	B	B	H	B	B	B	H	H	H	H	H	H	H
Squ7M	Sequ0670TUF	B	B	B	B	H	H	B	B	H	H	H	B	B	B	H	B	H	B	H	B	B	H	H	B	H	B	B	B	H	H	H	B	H	H	B	B	B	H	B	B	B	H	H	H	H	H	H	H
Squ7M	Sequ0784TUF	B	B	B	B	H	H	B	B	H	H	H	B	B	B	H	B	H	B	H	B	B	H	H	B	H	B	B	B	H	H	H	B	H	H	B	B	B	H	B	B	B	H	H	H	H	H	H	H
Squ7M	Sequ0825TUF	B	B	B	B	H	H	B	B	H	H	H	B	B	B	H	B	H	B	H	B	B	H	H	B	H	B	B	B	H	H	H	B	H	H	B	B	B	H	B	B	B	H	H	H	H	H	H	H
Squ7M	Sequ0849TUF	B	B	B	B	H	H	B	B	H	H	H	B	B	B	H	B	H	B	H	B	B	H	H	B	H	B	B	B	H	H	H	B	H	H	B	B	B	H	B	B	B	H	H	H	H	H	H	H
Squ7M	Sequ0382BAC	B	B	B	B	H	H	B	B	H	H	H	B	B	B	H	B	H	B	H	B	B	H	H	B	H	B	B	B	H	H	H	B	H	H	B	B	B	H	B	B	B	H	H	H	H	H	H	H
Squ7M	Sequ0420BAC	B	B	B	B	H	H	B	B	H	H	H	B	B	B	H	B	H	B	H	B	B	H	H	B	H	B	B	B	H	H	H	B	H	H	B	B	B	H	B	B	B	H	H	H	H	H	H	H
Squ7M	Sequ1209BAC	B	B	B	B	H	H	B	B	H	H	H	B	B	B	H	B	H	B	H	B	B	H	H	B	H	B	B	B	H	H	H	B	H	H	B	B	B	H	B	B	B	H	H	H	H	H	H	H
Squ7M	Sequ1421BAC	B	B	B	B	H	H	B	B	H	H	H	B	B	B	H	B	H	B	H	B	B	H	H	B	H	B	B	B	H	H	H	B	H	H	B	B	B	H	B	B	B	H	H	H	H	H	H	H
Squ7M	Sequ1628BAC	B	B	B	B	H	H	B	B	H	H	H	B	B	B	H	B	H	B	H	B	B	H	H	B	H	B	B	B	H	H	H	B	H	H	B	B	B	H	B	B	B	H	H	H	H	H	H	H
Squ7M	Sequ1700BAC	B	B	B	B	H	H	B	B	H	H	H	B	B	B	H	B	H	B	H	B	B	H	H	B	H	B	B	B	H	H	H	B	H	H	B	B	B	H	B	B	B	H	H	H	H	H	H	H
Squ7M	Sequ2990BAC	B	B	B	B	H	H	B	B	H	H	H	B	B	B	H	B	H	B	H	B	B	H	H	B	H	B	B	B	H	H	H	B	H	H	B	B	B	H	B	B	B	H	H	H	H	H	H	H
Squ7M	Sequ00355_2SNP	B	B	B	B	H	H	B	B	H	H	H	B	B	B	H	B	H	B	H	B	B	H	H	B	H	B	B	B	H	H	H	B	H	H	B	B	B	H	B	B	B	H	H	H	H	H	H	H
Squ7M	Sequ02207SNP	B	B	B	B	H	H	B	B	H	H	H	B	B	B	H	B	-	B	H	B	B	H	H	B	H	B	B	B	H	H	H	B	H	H	B	B	B	H	B	-	B	H	H	H	H	H	H	H
Squ7M	Sequ0569TUF	B	B	B	B	H	H	B	B	H	H	H	B	B	B	H	B	H	B	H	B	B	H	H	B	H	B	B	B	H	H	H	B	H	H	B	B	B	H	B	B	B	H	H	H	H	H	H	H
Squ7M	Sequ1757BAC	B	B	B	B	H	H	B	B	H	H	H	B	B	B	H	B	H	B	H	B	B	H	H	B	H	B	B	B	H	H	H	B	H	H	B	B	B	H	B	B	B	H	H	H	H	H	H	H
Squ7M	Sequ0462TUF	B	B	B	B	H	H	B	B	H	H	H	B	B	B	H	B	H	B	H	B	B	H	H	B	H	B	B	B	H	H	H	B	H	H	B	B	B	H	B	B	B	H	H	H	H	H	H	H
Squ7M	Sequ1120BAC	B	B	B	B	H	H	B	B	H	H	H	B	B	B	H	B	H	B	H	B	B	H	H	B	H	B	B	B	H	H	H	B	H	H	B	B	B	H	B	B	B	H	H	H	H	H	H	H
Squ7M	Sequ0268TUF	B	B	B	B	H	H	B	B	H	H	H	B	B	B	H	B	H	B	H	B	B	H	H	H	H	B	B	B	B	H	B	B	H	H	B	B	B	H	B	B	B	H	H	H	H	H	H	H
Squ7M	Sequ0447TUF	B	B	B	B	H	H	B	B	H	H	H	B	B	B	H	B	H	B	H	B	B	H	H	H	H	B	B	B	B	H	B	B	H	H	B	B	B	H	B	B	B	H	H	H	H	H	H	H
Squ7M	Sequ0169TUF	B	B	B	B	H	H	B	B	H	H	H	B	B	B	H	B	H	B	H	B	B	H	H	H	H	B	B	B	B	B	B	B	H	H	B	B	B	H	B	B	B	H	H	H	H	B	H	H
Squ7M	Sequ0567TUF	B	B	B	B	H	H	B	B	H	H	H	B	B	B	H	B	H	B	H	B	B	H	H	H	H	B	B	B	B	B	B	B	H	H	B	B	B	H	B	B	B	H	H	H	H	B	H	H
Squ7M	Sequ3208BAC	B	B	B	B	H	H	B	B	H	H	H	B	B	B	H	B	H	B	H	B	B	H	H	H	H	B	B	B	B	B	B	B	H	H	B	B	B	H	B	B	B	H	H	H	H	B	H	H
Squ7M	Sequ1041BAC	B	B	B	H	H	H	B	B	H	H	H	B	B	B	H	B	H	B	H	B	B	H	H	H	H	B	B	H	B	B	B	B	H	H	B	B	B	B	B	B	B	H	H	H	H	B	H	H
Squ7M	Sequ0069TUF	B	B	B	H	H	H	B	B	H	H	H	B	B	B	H	B	H	B	H	B	B	H	H	H	H	B	B	H	B	B	B	B	H	H	B	B	B	B	B	B	B	H	H	B	H	B	H	H
Squ7M	Sequ0106TUF	B	B	B	H	H	H	B	B	H	H	H	B	B	B	H	B	H	B	H	B	B	H	H	H	H	B	B	H	B	B	B	B	H	H	B	B	B	B	H	H	B	H	H	B	H	B	H	H
Squ7M	Sequ0786TUF	B	B	B	H	H	H	B	B	H	H	H	B	B	B	H	B	H	B	H	B	B	H	H	H	H	B	B	H	B	B	B	B	H	H	B	B	B	B	H	H	H	H	H	B	H	B	H	H
Squ7M	Sequ1147BAC	B	B	B	H	H	H	B	B	H	H	H	B	B	B	H	B	H	B	H	B	B	H	H	H	H	B	B	H	B	B	B	B	H	H	B	B	B	B	H	H	H	H	H	B	H	B	H	H
Squ7M	Sequ0451TUF	B	B	B	H	B	H	B	B	B	H	H	B	B	B	H	H	H	B	H	B	B	B	H	H	H	H	B	H	B	B	B	B	H	H	B	B	B	B	H	H	H	H	H	B	H	B	H	H
Squ7M	Sequ0787TUF	B	B	B	H	B	H	B	B	B	H	H	B	B	B	H	H	H	B	H	B	B	B	H	H	H	H	B	H	B	B	B	B	H	H	B	B	B	B	H	H	H	H	H	B	H	B	H	H
Squ7M	Sequ1041TUF	B	B	B	H	B	H	B	B	B	H	H	B	B	B	H	H	H	B	H	B	B	B	H	H	H	H	B	H	B	B	B	B	H	H	B	B	B	B	H	H	H	H	H	B	H	B	H	H
Squ8M	Sequ0074TUF	H	H	H	H	B	B	H	H	B	B	B	H	H	B	H	B	H	H	B	H	H	B	B	H	H	B	H	H	H	B	H	H	B	H	H	H	B	H	B	B	B	H	B	B	B	B	B	H
Squ8M	Sequ0431TUF	H	H	H	H	H	B	H	H	B	B	B	H	H	B	H	H	H	H	B	H	H	B	B	H	H	B	H	H	H	B	H	H	B	H	H	H	B	H	B	B	B	H	B	B	B	B	B	H
Squ8M	Sequ0851TUF	H	H	H	H	H	B	H	H	B	B	B	H	H	B	H	H	H	H	B	H	H	B	B	H	H	B	H	H	H	B	H	H	B	H	H	H	B	H	B	B	B	H	B	B	B	B	B	H
Squ8M	Sequ0906TUF	H	H	H	H	H	B	H	H	B	B	B	H	H	B	H	H	H	H	B	H	H	B	B	H	H	B	H	H	H	B	H	H	B	H	H	H	B	H	B	B	B	H	B	B	B	B	B	H
Squ8M	Sequ0160TUF	H	H	H	H	H	B	H	H	B	B	B	H	H	B	H	H	H	B	B	H	H	B	B	H	H	B	H	H	H	B	H	H	B	H	H	H	B	H	B	B	B	H	B	B	B	B	B	H
Squ8M	Sequ3175BAC	H	H	B	H	H	B	H	H	H	B	B	H	H	B	H	H	H	B	B	H	H	H	B	H	B	B	H	H	H	B	H	H	B	H	H	H	B	H	B	B	B	H	B	B	B	B	B	H
Squ8M	Sequ2078BAC	H	H	B	H	H	B	H	H	H	B	B	H	H	B	H	H	H	B	B	H	H	H	B	H	B	B	H	H	H	B	H	H	B	H	H	H	B	H	B	B	B	H	B	B	B	B	B	H
Squ8M	Sequ00889_1SNP	H	H	B	H	H	B	H	H	H	B	H	H	H	B	H	H	H	B	B	H	H	H	B	B	B	B	H	H	H	B	H	H	B	H	H	H	B	B	B	B	B	H	B	B	B	B	B	H
Squ8M	Sequ00889_2SNP	H	H	B	H	H	B	H	H	H	B	H	H	H	B	H	H	H	B	B	H	H	H	B	B	B	B	H	H	H	B	H	H	B	H	H	H	B	B	B	B	B	H	B	B	B	B	B	H
Squ8M	Sequ04626SNP	H	H	B	H	H	B	H	H	H	B	H	H	H	B	H	H	H	B	B	H	H	H	B	B	B	B	H	H	H	B	H	H	B	H	H	H	B	B	B	B	B	H	B	B	B	B	B	H
Squ8M	Sequ0873TUF	H	H	B	H	H	B	H	H	H	H	H	H	H	B	H	H	H	B	B	H	H	H	B	B	B	B	H	H	H	B	H	H	B	H	H	H	B	B	B	B	B	H	B	B	H	B	B	H
Squ8M	Sequ1769BAC	H	H	B	B	H	B	H	H	H	H	H	H	H	B	H	H	H	B	B	H	H	H	B	B	B	B	H	H	H	B	H	H	B	H	B	H	B	B	B	B	B	H	B	B	H	B	B	H
Squ8M	Sequ0670BAC	H	H	B	B	H	B	H	H	H	H	H	H	H	B	H	H	H	B	B	H	B	H	B	B	B	B	H	H	H	B	H	B	B	H	B	H	B	B	B	B	B	H	B	B	H	B	B	B
Squ8M	Sequ0503TUF	B	H	B	B	H	B	H	H	H	H	H	H	H	B	H	H	H	B	B	H	B	H	B	B	B	B	H	H	H	B	H	B	B	H	B	H	B	B	H	B	B	H	B	B	H	B	B	B
Squ8M	Sequ0610TUF	B	H	B	B	H	B	H	H	H	H	H	H	H	B	H	H	H	B	B	H	B	H	B	B	B	B	H	H	H	B	H	B	B	H	B	H	B	B	H	B	B	H	B	B	H	B	B	B
Squ8M	Sequ0101TUF	B	H	B	B	H	B	H	H	H	H	H	H	H	B	H	H	H	B	B	H	B	H	B	B	B	B	H	H	H	B	H	B	B	H	B	H	B	B	H	B	B	H	B	H	H	B	B	B
Squ8M	Sequ2536BAC	B	H	B	B	H	B	H	H	H	H	H	H	H	B	H	H	H	B	B	H	B	H	B	B	B	B	H	H	H	B	H	B	B	H	B	H	B	B	H	B	B	H	B	H	H	B	B	B
Squ8M	Sequ2198BAC	B	H	B	B	H	B	H	H	H	H	H	H	H	B	H	H	H	B	B	H	B	H	B	B	B	B	H	B	H	B	H	B	B	H	B	H	B	B	H	B	B	H	H	H	H	B	B	B
Squ8M	Sequ02681SNP	B	H	B	B	H	B	H	H	H	H	H	H	H	B	B	H	H	B	B	H	B	H	B	B	B	B	H	B	H	B	H	B	B	H	-	H	B	B	H	B	-	H	H	H	H	B	B	H
Squ8M	Sequ0801TUF	B	H	B	B	H	B	H	H	H	H	H	H	H	B	B	H	H	B	B	H	B	H	B	B	B	B	H	B	H	B	H	B	B	H	B	H	B	B	H	B	B	H	H	H	H	B	B	B
Squ8M	Sequ0883TUF	B	H	B	B	H	B	H	H	H	H	H	H	H	B	B	H	H	B	B	H	B	H	B	B	B	B	H	B	H	B	H	B	B	H	B	H	B	B	H	B	B	H	H	H	H	B	B	B
Squ8M	Sequ0985TUF	B	H	B	B	H	B	H	H	H	H	H	H	H	B	B	H	H	B	B	H	B	H	B	B	B	B	H	B	H	B	H	B	B	H	B	H	B	B	H	B	B	H	H	H	H	B	B	B
Squ8M	Sequ1039TUF	B	H	B	B	H	B	H	H	H	H	H	H	H	B	B	H	H	B	B	H	B	H	B	B	B	B	H	B	H	B	H	B	B	H	B	H	B	B	H	B	B	H	H	H	H	B	B	B
Squ8M	Sequ0507BAC	B	H	B	B	H	B	H	H	H	H	H	H	H	B	B	H	H	B	B	H	B	H	B	B	B	B	H	B	H	B	H	B	B	H	B	H	B	B	H	B	B	H	H	H	H	B	B	B
Squ8M	Sequ0575BAC	B	H	B	B	H	B	H	H	H	H	H	H	H	B	B	H	H	B	B	H	B	H	B	B	B	B	H	B	H	B	H	B	B	H	B	H	B	B	H	B	B	H	H	H	H	B	B	B
Squ8M	Sequ2218BAC	B	H	B	B	H	B	H	H	H	H	H	H	H	B	B	H	H	B	B	H	B	H	B	B	B	B	H	B	H	B	H	B	B	H	B	H	B	B	H	B	B	H	H	H	H	B	B	B
Squ8M	Sequ3193BAC	B	H	B	B	H	B	H	H	H	H	H	H	H	B	B	H	H	B	B	H	B	H	B	B	B	B	H	B	H	B	H	B	B	H	B	H	B	B	H	B	B	H	H	H	H	B	B	B
Squ8M	Sequ02141SNP	B	H	B	B	H	B	H	H	H	H	H	H	H	B	B	H	H	B	B	H	B	H	B	B	B	B	H	B	H	B	H	B	B	H	B	H	B	B	H	B	B	H	H	H	H	B	B	B
Squ8M	Sequ05005SNP	H	H	B	B	H	B	H	H	H	H	H	H	H	B	B	H	H	B	B	H	B	H	B	-	B	B	H	B	H	B	H	B	-	H	B	H	B	B	H	-	B	H	H	H	H	B	B	-
Squ9M	Sequ0417TUF	B	B	H	H	H	B	H	H	H	B	B	H	B	B	B	H	B	B	H	B	H	B	B	H	H	H	H	H	B	B	B	H	H	B	B	B	H	H	H	B	H	B	H	H	B	B	H	B
Squ9M	Sequ0727TUF	B	B	H	H	H	B	H	H	H	B	B	H	B	B	B	H	B	B	H	B	H	B	B	H	H	H	H	H	B	B	B	H	H	B	B	B	H	H	H	B	H	B	H	H	B	B	H	B
Squ9M	Sequ0772TUF	B	B	H	H	H	B	H	H	H	B	B	H	B	B	B	H	B	B	H	B	H	B	B	H	H	H	H	H	B	B	B	H	H	B	B	B	H	H	H	B	H	B	H	H	B	B	H	B
Squ9M	Sequ0806TUF	B	B	H	H	H	B	H	H	H	B	B	H	B	B	B	H	B	B	H	B	H	B	B	H	H	H	H	H	B	B	B	H	H	B	B	B	H	H	H	B	H	B	H	H	B	B	H	B
Squ9M	Sequ0854TUF	B	B	H	H	H	B	H	H	H	B	B	H	B	B	B	H	B	B	H	B	H	B	B	H	H	H	H	H	B	B	B	H	H	B	B	B	H	H	H	B	H	B	H	H	B	B	H	B
Squ9M	Sequ0929TUF	B	B	H	H	H	B	H	H	H	B	B	H	B	B	B	H	B	B	H	B	H	B	B	H	H	H	H	H	B	B	B	H	H	B	B	B	H	H	H	B	H	B	H	H	B	B	H	B
Squ9M	Sequ0932TUF	B	B	H	H	H	B	H	H	H	B	B	H	B	B	B	H	B	B	H	B	H	B	B	H	H	H	H	H	B	B	B	H	H	B	B	B	H	H	H	B	H	B	H	H	B	B	H	B
Squ9M	Sequ1046TUF	B	B	H	H	H	B	H	H	H	B	B	H	B	B	B	H	B	B	H	B	H	B	B	H	H	H	H	H	B	B	B	H	H	B	B	B	H	H	H	B	H	B	H	H	B	B	H	B
Squ9M	Sequ0781BAC	B	B	H	H	H	B	H	H	H	B	B	H	B	B	B	H	B	B	H	B	H	B	B	H	H	H	H	H	B	B	B	H	H	B	B	B	H	H	H	B	H	B	H	H	B	B	H	B
Squ9M	Sequ1079BAC	B	B	H	H	H	B	H	H	H	B	B	H	B	B	B	H	B	B	H	B	H	B	B	H	H	H	H	H	B	B	B	H	H	B	B	B	H	H	H	B	H	B	H	H	B	B	H	B
Squ9M	Sequ1470BAC	B	B	H	H	H	B	H	H	H	B	B	H	B	B	B	H	B	B	H	B	H	B	B	H	H	H	H	H	B	B	B	H	H	B	B	B	H	H	H	B	H	B	H	H	B	B	H	B
Squ9M	Sequ02391SNP	B	B	H	H	H	B	H	H	H	B	B	H	B	B	B	H	B	B	H	B	H	B	B	H	H	H	H	H	B	B	B	H	H	B	B	B	H	H	H	B	H	B	H	H	B	B	H	B
Squ9M	Sequ03490SNP	B	B	H	H	H	B	H	H	H	B	B	H	B	B	B	H	B	B	H	B	H	B	B	H	H	H	H	H	B	B	B	H	H	B	B	B	H	H	H	B	H	B	H	H	B	B	H	B
Squ9M	Sequ0112TUF	B	B	H	H	H	B	H	H	H	B	B	H	B	B	B	H	B	B	H	B	H	B	B	H	H	H	H	H	B	B	B	H	H	B	B	B	H	H	H	B	H	B	H	H	B	B	H	B
Squ9M	Sequ0207TUF	B	B	H	H	H	B	H	H	H	B	B	H	B	B	B	H	B	B	H	B	H	B	B	H	H	H	H	H	B	B	B	H	H	B	B	B	H	H	H	B	H	B	H	H	B	B	H	B
Squ9M	Sequ0590TUF	B	B	H	H	H	B	H	H	H	B	B	H	B	B	B	H	B	B	H	B	H	B	B	H	H	H	H	H	B	B	B	H	H	B	B	B	H	H	H	B	H	B	H	H	B	B	H	B
Squ9M	Sequ0673TUF	B	B	H	H	H	B	H	H	H	B	B	H	B	B	B	H	B	B	H	B	H	B	B	H	H	H	H	H	B	B	B	H	H	B	B	B	H	H	H	B	H	B	H	H	B	B	H	B
Squ9M	Sequ0765TUF	B	B	H	H	H	B	H	H	H	B	B	H	B	B	B	H	B	B	H	B	H	B	B	H	H	H	H	H	B	B	B	H	H	B	B	B	H	H	H	B	H	B	H	H	B	B	H	B
Squ9M	Sequ1850BAC	B	B	H	H	H	B	H	H	H	B	B	H	B	B	B	H	B	B	H	B	H	B	B	H	H	H	H	H	B	B	B	H	H	B	B	B	H	H	H	B	H	B	H	H	B	B	H	B
Squ9M	Sequ02010SNP	B	B	H	H	H	B	H	H	H	B	B	H	B	B	B	H	B	B	H	B	H	B	B	H	H	H	H	H	B	B	B	H	H	B	B	B	H	H	H	B	H	B	H	H	B	B	H	B
Squ9M	Sequ01457SNP	B	-	-	H	H	B	H	H	H	B	B	H	B	B	B	H	B	B	H	B	H	B	B	H	H	-	H	H	B	B	B	H	H	B	B	B	H	H	H	B	H	-	H	H	B	B	H	B
Squ9M	Sequ0072TUF	B	B	H	H	H	B	H	H	H	B	B	H	B	B	B	H	B	H	H	B	H	B	B	H	H	H	H	H	B	B	B	H	H	B	B	B	H	H	H	B	H	B	H	H	B	B	H	B
Squ9M	Sequ0850BAC	B	B	H	H	H	B	H	H	H	B	B	H	B	B	B	H	B	H	H	B	H	B	B	H	H	H	H	H	B	B	B	H	H	B	B	B	H	H	H	B	H	B	H	H	B	B	H	B
Squ9M	Sequ1910BAC	B	B	H	H	H	B	H	H	H	B	B	H	B	B	B	H	B	H	H	B	H	B	B	H	H	H	H	H	B	B	B	H	H	B	B	B	H	H	H	B	H	B	H	H	B	B	H	B
Squ9M	Sequ2559BAC	B	B	H	H	H	B	H	H	H	B	B	H	B	B	B	H	B	H	H	B	H	B	B	H	H	H	H	H	B	B	B	H	H	B	B	B	H	H	H	B	H	B	H	H	B	B	H	B
Squ9M	Sequ00971SNP	B	B	H	H	H	B	H	H	H	B	B	H	B	B	B	H	B	H	H	B	H	B	B	H	H	H	H	H	B	B	B	H	H	B	B	B	H	H	H	B	H	B	H	H	B	B	H	B
Squ9M	Sequ0505TUF	B	B	H	H	H	B	H	H	H	B	B	H	H	B	B	H	B	H	H	H	H	B	H	H	H	H	H	H	B	B	B	H	H	B	B	B	H	H	H	B	H	B	H	H	B	B	H	B
Squ9M	Sequ0711TUF	B	B	H	H	H	B	H	H	H	B	B	H	H	B	B	H	B	H	H	H	H	B	H	H	H	H	H	H	B	B	B	H	H	B	B	B	H	H	H	B	H	B	H	H	B	B	H	B
Squ9M	Sequ0891TUF	B	B	H	H	H	B	H	H	H	B	B	H	H	B	B	H	B	H	H	H	H	B	H	H	H	H	H	H	B	B	B	H	H	B	B	B	H	H	H	B	H	B	H	H	B	B	H	B
Squ9M	Sequ0261BAC	B	B	H	H	H	B	H	H	H	B	B	H	H	B	B	H	B	H	H	H	H	B	H	H	H	H	H	H	B	B	B	H	H	B	B	B	H	H	H	B	H	B	H	H	B	B	H	B
Squ9M	Sequ1349BAC	B	B	H	H	H	B	H	H	H	B	B	H	H	B	B	H	B	H	H	H	H	B	H	H	H	H	H	H	B	B	B	H	H	B	B	B	H	H	H	B	H	B	H	H	B	B	H	B
Squ9M	Sequ1869BAC	B	B	H	H	H	B	H	H	H	B	B	H	H	B	B	H	B	H	H	H	H	B	H	H	H	H	H	H	B	B	B	H	H	B	B	B	H	H	H	B	H	B	H	H	B	B	H	B
Squ9M	Sequ2504BAC	B	B	H	H	H	B	H	H	H	B	B	H	H	B	B	H	B	H	H	H	H	B	H	H	H	H	H	H	B	B	B	H	H	B	B	B	H	H	H	B	H	B	H	H	B	B	H	B
Squ9M	Sequ3122BAC	B	B	H	H	H	B	H	H	H	B	B	H	H	B	B	H	B	H	H	H	H	B	H	H	H	H	H	H	B	B	B	H	H	B	B	B	H	H	H	B	H	B	H	H	B	B	H	B
Squ9M	Sequ0128BAC	H	B	H	H	H	B	H	H	H	B	B	H	H	B	B	H	B	H	H	H	H	B	H	H	H	H	H	H	B	B	B	H	H	B	B	B	H	B	H	B	H	B	H	H	B	B	H	B
Squ9M	Sequ0070TUF	H	B	H	H	H	B	H	H	H	B	B	H	H	B	B	H	B	H	H	H	H	B	H	H	H	H	H	H	B	B	B	H	H	B	B	B	H	B	H	B	H	B	H	H	B	B	H	B
Squ9M	Sequ0556BAC	H	B	H	H	H	B	H	H	H	B	B	H	H	B	B	H	B	H	H	H	H	B	H	H	H	H	H	H	B	B	B	H	H	B	B	B	H	B	H	B	H	B	H	H	B	B	H	B
Squ9M	Sequ1029TUF	H	B	H	H	H	B	H	H	H	B	H	H	H	B	H	H	B	H	H	H	H	B	H	H	H	H	H	H	H	B	B	H	H	B	B	B	H	B	H	B	H	B	B	H	B	B	H	B
Squ9M	Sequ01071SNP	H	B	H	H	H	H	H	H	H	H	H	H	H	B	H	H	B	H	H	H	H	B	H	H	H	H	H	B	H	B	B	H	H	B	B	H	H	B	H	B	H	B	B	H	B	B	H	B
Squ9M	Sequ0374BAC	H	B	H	H	H	H	H	H	H	H	H	H	H	B	H	H	B	H	H	H	H	B	H	H	H	H	H	B	H	B	B	H	H	B	B	H	H	B	H	B	H	B	B	H	B	B	H	B
Squ9M	Sequ0187TUF	H	B	H	H	H	H	H	B	H	H	H	H	H	B	H	B	B	H	H	H	H	B	H	H	B	H	H	B	H	B	B	H	H	B	B	H	H	B	H	B	B	B	B	H	B	B	H	H
Squ9M	Sequ0947TUF	H	B	B	H	H	H	B	B	H	H	H	H	H	B	H	B	B	H	H	H	H	B	H	B	B	H	H	B	H	B	H	H	H	B	B	H	H	B	H	H	B	B	B	B	B	B	B	H
Squ9M	Sequ03720SNP	H	B	B	H	H	H	B	B	H	H	H	H	H	B	H	B	B	H	H	H	H	B	H	B	B	H	H	B	H	B	H	H	H	B	B	H	H	B	H	H	B	B	B	B	B	B	B	H
Squ10M	Sequ0059TUF	B	H	B	B	B	B	B	B	H	B	H	H	B	B	H	B	B	B	B	H	H	B	H	B	B	H	H	B	B	B	H	H	B	B	B	B	B	B	B	H	B	B	B	B	H	H	B	B
Squ10M	Sequ0311TUF	B	H	B	B	B	B	B	B	H	B	H	H	B	B	H	B	B	B	B	H	H	B	H	B	B	H	H	B	B	B	H	H	B	B	B	B	B	B	B	H	B	B	B	B	H	H	B	B
Squ10M	Sequ0521TUF	B	H	B	B	B	B	B	B	H	B	H	H	B	B	H	B	B	B	B	H	H	B	H	B	B	H	H	B	B	B	H	H	B	B	B	B	B	B	B	H	B	B	B	B	H	H	B	B
Squ10M	Sequ0835TUF	B	H	B	B	B	B	B	B	H	B	H	H	B	B	H	B	B	B	B	H	H	B	H	B	B	H	H	B	B	B	H	H	B	B	B	B	B	B	B	H	B	B	B	B	H	H	B	B
Squ10M	Sequ0915TUF	B	H	B	B	B	B	B	B	H	B	H	H	B	B	H	B	B	B	B	H	H	B	H	B	B	H	H	B	B	B	H	H	B	B	B	B	B	B	B	H	B	B	B	B	H	H	B	B
Squ10M	Sequ0944TUF	B	H	B	B	B	B	B	B	H	B	H	H	B	B	H	B	B	B	B	H	H	B	H	B	B	H	H	B	B	B	H	H	B	B	B	B	B	B	B	H	B	B	B	B	H	H	B	B
Squ10M	Sequ1056TUF	B	H	B	B	B	B	B	B	H	B	H	H	B	B	H	B	B	B	B	H	H	B	H	B	B	H	H	B	B	B	H	H	B	B	B	B	B	B	B	H	B	B	B	B	H	H	B	B
Squ10M	Sequ0542BAC	B	H	B	B	B	B	B	B	H	B	H	H	B	B	H	B	B	B	B	H	H	B	H	B	B	H	H	B	B	B	H	H	B	B	B	B	B	B	B	H	B	B	B	B	H	H	B	B
Squ10M	Sequ0675BAC	B	H	B	B	B	B	B	B	H	B	H	H	B	B	H	B	B	B	B	H	H	B	H	B	B	H	H	B	B	B	H	H	B	B	B	B	B	B	B	H	B	B	B	B	H	H	B	B
Squ10M	Sequ1227BAC	B	H	B	B	B	B	B	B	H	B	H	H	B	B	H	B	B	B	B	H	H	B	H	B	B	H	H	B	B	B	H	H	B	B	B	B	B	B	B	H	B	B	B	B	H	H	B	B
Squ10M	Sequ1427BAC	B	H	B	B	B	B	B	B	H	B	H	H	B	B	H	B	B	B	B	H	H	B	H	B	B	H	H	B	B	B	H	H	B	B	B	B	B	B	B	H	B	B	B	B	H	H	B	B
Squ10M	Sequ1876BAC	B	H	B	B	B	B	B	B	H	B	H	H	B	B	H	B	B	B	B	H	H	B	H	B	B	H	H	B	B	B	H	H	B	B	B	B	B	B	B	H	B	B	B	B	H	H	B	B
Squ10M	Sequ2516BAC	B	H	B	B	B	B	B	B	H	B	H	H	B	B	H	B	B	B	B	H	H	B	H	B	B	H	H	B	B	B	H	H	B	B	B	B	B	B	B	H	B	B	B	B	H	H	B	B
Squ10M	Sequ03717SNP	B	H	B	B	B	B	B	B	H	B	H	H	B	B	H	B	B	B	B	H	H	B	H	B	B	H	H	B	B	B	H	H	B	B	B	B	B	B	B	H	B	B	B	B	H	H	B	B
Squ10M	Sequ04379SNP	B	H	B	B	B	B	B	B	H	B	H	H	B	B	H	B	B	B	B	H	H	B	H	B	B	H	H	B	B	B	H	H	B	B	B	B	B	B	B	H	B	B	B	B	H	H	B	B
Squ10M	Sequ03235SNP	B	H	B	B	-	B	B	B	H	B	H	H	B	B	H	B	B	-	B	H	H	B	H	B	B	H	H	B	B	B	H	H	B	B	B	B	B	B	B	H	B	B	B	B	H	H	B	B
Squ10M	Sequ0119TUF	B	B	B	B	B	B	B	B	H	B	H	H	B	B	H	B	B	B	B	H	H	B	H	B	B	H	H	B	B	B	H	H	B	B	B	B	B	B	B	H	B	B	B	B	H	H	B	B
Squ10M	Sequ0235TUF	B	B	B	B	B	B	B	B	H	B	H	H	B	B	H	B	B	B	B	H	H	B	H	B	B	H	H	B	B	B	H	H	B	B	B	B	B	B	B	H	B	B	B	B	H	H	B	B
Squ10M	Sequ0532TUF	B	B	B	B	B	B	B	B	H	B	H	H	B	B	H	B	B	B	B	H	H	B	H	B	B	H	H	B	B	B	H	H	B	B	B	B	B	B	B	H	B	B	B	B	H	H	B	B
Squ10M	Sequ0577TUF	B	B	B	B	B	B	B	B	H	B	H	H	B	B	H	B	B	B	B	H	H	B	H	B	B	H	H	B	B	B	H	H	B	B	B	B	B	B	B	H	B	B	B	B	H	H	B	B
Squ10M	Sequ0620TUF	B	B	B	B	B	B	B	B	H	B	H	H	B	B	H	B	B	B	B	H	H	B	H	B	B	H	H	B	B	B	H	H	B	B	B	B	B	B	B	H	B	B	B	B	H	H	B	B
Squ10M	Sequ0652TUF	B	B	B	B	B	B	B	B	H	B	H	H	B	B	H	B	B	B	B	H	H	B	H	B	B	H	H	B	B	B	H	H	B	B	B	B	B	B	B	H	B	B	B	B	H	H	B	B
Squ10M	Sequ0927TUF	B	B	B	B	B	B	B	B	H	B	H	H	B	B	H	B	B	B	B	H	H	B	H	B	B	H	H	B	B	B	H	H	B	B	B	B	B	B	B	H	B	B	B	B	H	H	B	B
Squ10M	Sequ0988TUF	B	B	B	B	B	B	B	B	H	B	H	H	B	B	H	B	B	B	B	H	H	B	H	B	B	H	H	B	B	B	H	H	B	B	B	B	B	B	B	H	B	B	B	B	H	H	B	B
Squ10M	Sequ0012BAC	B	B	B	B	B	B	B	B	H	B	H	H	B	B	H	B	B	B	B	H	H	B	H	B	B	H	H	B	B	B	H	H	B	B	B	B	B	B	B	H	B	B	B	B	H	H	B	B
Squ10M	Sequ0199BAC	B	B	B	B	B	B	B	B	H	B	H	H	B	B	H	B	B	B	B	H	H	B	H	B	B	H	H	B	B	B	H	H	B	B	B	B	B	B	B	H	B	B	B	B	H	H	B	B
Squ10M	Sequ0648BAC	B	B	B	B	B	B	B	B	H	B	H	H	B	B	H	B	B	B	B	H	H	B	H	B	B	H	H	B	B	B	H	H	B	B	B	B	B	B	B	H	B	B	B	B	H	H	B	B
Squ10M	Sequ1640BAC	B	B	B	B	B	B	B	B	H	B	H	H	B	B	H	B	B	B	B	H	H	B	H	B	B	H	H	B	B	B	H	H	B	B	B	B	B	B	B	H	B	B	B	B	H	H	B	B
Squ10M	Sequ1885BAC	B	B	B	B	B	B	B	B	H	B	H	H	B	B	H	B	B	B	B	H	H	B	H	B	B	H	H	B	B	B	H	H	B	B	B	B	B	B	B	H	B	B	B	B	H	H	B	B
Squ10M	Sequ0882TUF	B	B	B	B	B	B	B	B	H	B	H	H	B	B	H	B	B	B	B	H	H	B	H	B	B	H	H	B	B	B	H	H	B	B	B	B	H	B	B	H	B	B	B	B	H	H	B	B
Squ10M	Sequ0840BAC	B	B	B	B	B	B	B	B	H	B	H	H	B	B	H	B	B	B	B	H	H	B	H	B	B	H	H	B	B	B	H	H	B	B	B	B	H	B	B	H	B	B	B	B	H	H	B	B
Squ10M	Sequ1178BAC	B	B	B	B	B	B	B	B	H	B	H	H	B	B	H	B	B	B	B	H	H	B	H	B	B	H	H	B	B	B	H	H	B	B	B	B	H	B	B	H	B	B	B	B	H	H	B	B
Squ10M	Sequ0165TUF	B	B	B	B	B	B	B	B	H	B	H	H	B	B	H	B	H	B	B	H	H	B	H	B	B	H	H	B	B	B	H	H	B	B	B	B	H	B	B	H	B	B	B	B	H	H	B	B
Squ10M	Sequ0611TUF	B	B	B	B	B	B	B	B	H	B	H	H	B	B	H	B	H	B	B	H	H	B	H	B	B	H	H	B	B	B	H	H	B	B	B	B	H	B	B	H	B	B	B	B	H	H	B	B
Squ10M	Sequ0452TUF	B	B	B	B	B	B	B	B	H	B	H	H	B	B	H	B	H	B	B	H	H	B	H	B	B	H	H	B	B	B	H	H	B	B	B	B	H	B	B	H	B	B	B	B	H	H	B	B
Squ10M	Sequ0922TUF	B	B	B	B	B	B	B	B	H	B	H	H	B	B	H	B	H	B	B	H	H	B	H	B	B	H	H	B	B	B	H	H	B	B	B	B	H	B	B	H	B	B	B	B	H	H	B	B
Squ10M	Sequ3009BAC	B	B	B	B	B	B	B	B	H	B	H	H	B	B	H	B	H	B	B	H	H	B	H	B	B	H	H	B	B	B	H	H	B	B	B	B	H	B	B	H	B	B	B	B	H	H	B	B
Squ10M	Sequ2587BAC	B	B	B	B	B	B	B	B	H	H	H	B	B	B	B	B	H	B	B	H	H	B	H	B	B	H	H	B	B	B	H	H	B	B	B	B	H	B	B	H	B	B	B	B	H	H	B	B
Squ10M	Sequ2159BAC	B	B	B	B	B	B	B	B	H	H	H	B	B	B	B	B	H	B	B	H	H	B	H	H	B	H	H	H	B	B	H	H	B	B	B	B	H	H	B	H	B	B	B	B	B	B	B	B
Squ11M	Sequ0104TUF	B	H	B	B	B	H	H	H	B	H	B	H	H	B	B	H	H	B	H	H	H	H	H	B	B	B	H	B	H	B	B	B	B	B	B	H	B	B	H	B	B	B	B	H	B	B	H	B
Squ11M	Sequ0245TUF	B	H	B	B	B	H	H	H	B	H	B	H	H	B	B	H	H	B	H	H	H	H	H	B	B	B	H	B	H	B	B	B	B	B	B	H	B	B	H	B	B	B	B	H	B	B	H	B
Squ11M	Sequ0588TUF	B	H	B	B	B	H	H	H	B	H	B	H	H	B	B	H	H	B	H	H	H	H	H	B	B	B	H	B	H	B	B	B	B	B	B	H	B	B	H	B	B	B	B	H	B	B	H	B
Squ11M	Sequ0837TUF	B	H	B	B	B	H	H	H	B	H	B	H	H	B	B	H	H	B	H	H	H	H	H	B	B	B	H	B	H	B	B	B	B	B	B	H	B	B	H	B	B	B	B	H	B	B	H	B
Squ11M	Sequ0047TUF	B	H	B	B	B	H	H	H	B	H	B	H	H	B	B	H	H	B	H	H	H	H	H	B	B	B	H	B	H	B	B	B	B	B	B	H	B	B	H	B	B	B	H	H	B	B	H	B
Squ11M	Sequ0204TUF	B	H	B	B	B	H	H	H	B	H	B	H	H	B	B	H	H	B	H	H	H	H	H	B	B	B	H	B	H	B	B	B	B	B	B	H	B	B	H	B	B	B	H	H	B	B	H	B
Squ11M	Sequ1325BAC	B	H	B	B	B	H	H	H	B	H	B	H	H	B	B	H	H	B	H	H	H	H	H	B	B	B	H	B	H	B	B	B	B	B	B	H	B	B	H	B	B	B	H	H	B	B	H	B
Squ11M	Sequ0974TUF	B	H	B	B	B	H	H	H	B	H	B	H	H	B	B	H	H	B	H	H	H	H	H	B	B	B	H	B	H	B	B	B	B	B	B	H	B	B	H	B	B	B	H	H	B	B	H	B
Squ11M	Sequ03370SNP	B	H	H	H	B	H	B	H	B	H	B	H	H	B	H	H	H	B	H	H	H	H	H	B	B	B	H	B	H	B	B	B	B	B	B	H	B	B	H	H	B	B	H	H	H	B	H	B
Squ11M	Sequ04331_2SNP	B	H	H	H	B	H	B	H	B	H	B	H	H	B	H	H	H	B	H	H	H	H	H	B	B	B	H	B	H	B	B	B	B	B	B	H	B	B	H	H	B	B	H	H	H	B	H	B
Squ11M	Sequ1806BAC	B	H	H	H	B	B	B	H	B	B	B	H	H	B	H	H	H	B	H	H	H	H	H	B	B	B	H	B	H	H	B	B	H	H	B	H	B	B	H	H	B	B	H	H	H	B	H	B
Squ11M	Sequ1036TUF	H	H	H	H	B	B	B	H	B	B	B	H	H	B	H	H	H	H	H	H	H	H	B	B	B	B	H	B	B	H	B	B	H	H	B	H	H	H	B	H	B	B	H	B	H	B	B	B
Squ11M	Sequ0132TUF	H	H	H	H	B	B	B	H	B	B	B	H	H	B	H	H	H	H	B	H	H	H	B	B	B	B	H	B	B	H	B	B	H	H	B	H	H	H	B	H	B	B	H	B	H	B	B	H
Squ11M	Sequ2849BAC	H	H	H	H	B	B	B	H	B	B	B	H	H	B	H	H	H	H	B	B	H	H	B	B	B	B	H	B	B	H	B	B	H	H	B	H	H	H	B	H	B	B	H	B	H	B	B	H
Squ12M	Sequ0017TUF	H	B	B	H	B	B	H	H	H	H	H	H	B	H	B	H	H	B	H	H	H	B	B	H	H	B	B	B	H	H	H	B	H	H	B	B	H	B	B	H	B	H	H	H	B	H	B	B
Squ12M	Sequ0212TUF	H	B	B	H	B	B	H	H	H	H	H	H	B	H	B	H	H	B	H	H	H	B	B	H	H	B	B	B	H	H	H	B	H	H	B	B	H	B	B	H	B	H	H	H	B	H	B	B
Squ12M	Sequ0301TUF	H	B	B	H	B	B	H	H	H	H	H	H	B	H	B	H	H	B	H	H	H	B	B	H	H	B	B	B	H	H	H	B	H	H	B	B	H	B	B	H	B	H	H	H	B	H	B	B
Squ12M	Sequ0320TUF	H	B	B	H	B	B	H	H	H	H	H	H	B	H	B	H	H	B	H	H	H	B	B	H	H	B	B	B	H	H	H	B	H	H	B	B	H	B	B	H	B	H	H	H	B	H	B	B
Squ12M	Sequ0589TUF	H	B	B	H	B	B	H	H	H	H	H	H	B	H	B	H	H	B	H	H	H	B	B	H	H	B	B	B	H	H	H	B	H	H	B	B	H	B	B	H	B	H	H	H	B	H	B	B
Squ12M	Sequ0645TUF	H	B	B	H	B	B	H	H	H	H	H	H	B	H	B	H	H	B	H	H	H	B	B	H	H	B	B	B	H	H	H	B	H	H	B	B	H	B	B	H	B	H	H	H	B	H	B	B
Squ12M	Sequ1001TUF	H	B	B	H	B	B	H	H	H	H	H	H	B	H	B	H	H	B	H	H	H	B	B	H	H	B	B	B	H	H	H	B	H	H	B	B	H	B	B	H	B	H	H	H	B	H	B	B
Squ12M	Sequ1002TUF	H	B	B	H	B	B	H	H	H	H	H	H	B	H	B	H	H	B	H	H	H	B	B	H	H	B	B	B	H	H	H	B	H	H	B	B	H	B	B	H	B	H	H	H	B	H	B	B
Squ12M	Sequ0424BAC	H	B	B	H	B	B	H	H	H	H	H	H	B	H	B	H	H	B	H	H	H	B	B	H	H	B	B	B	H	H	H	B	H	H	B	B	H	B	B	H	B	H	H	H	B	H	B	B
Squ12M	Sequ0485BAC	H	B	B	H	B	B	H	H	H	H	H	H	B	H	B	H	H	B	H	H	H	B	B	H	H	B	B	B	H	H	H	B	H	H	B	B	H	B	B	H	B	H	H	H	B	H	B	B
Squ12M	Sequ1881BAC	H	B	B	H	B	B	H	H	H	H	H	H	B	H	B	H	H	B	H	H	H	B	B	H	H	B	B	B	H	H	H	B	H	H	B	B	H	B	B	H	B	H	H	H	B	H	B	B
Squ12M	Sequ2384BAC	H	B	B	H	B	B	H	H	H	H	H	H	B	H	B	H	H	B	H	H	H	B	B	H	H	B	B	B	H	H	H	B	H	H	B	B	H	B	B	H	B	H	H	H	B	H	B	B
Squ12M	Sequ2501BAC	H	B	B	H	B	B	H	H	H	H	H	H	B	H	B	H	H	B	H	H	H	B	B	H	H	B	B	B	H	H	H	B	H	H	B	B	H	B	B	H	B	H	H	H	B	H	B	B
Squ12M	Sequ2687BAC	H	B	B	H	B	B	H	H	H	H	H	H	B	H	B	H	H	B	H	H	H	B	B	H	H	B	B	B	H	H	H	B	H	H	B	B	H	B	B	H	B	H	H	H	B	H	B	B
Squ12M	Sequ0021TUF	H	B	B	H	B	B	H	H	H	H	H	H	B	H	B	H	H	B	H	H	H	B	B	H	H	B	B	B	H	H	H	B	H	H	B	B	H	B	B	H	B	H	H	H	B	H	B	B
Squ12M	Sequ0776TUF	H	B	B	H	B	B	H	H	H	H	H	H	B	H	B	H	H	B	H	H	H	B	B	H	H	B	B	B	H	H	H	B	H	H	B	B	H	B	B	H	B	H	H	H	B	H	B	B
Squ12M	Sequ0782TUF	H	B	B	H	B	B	H	H	H	H	H	H	B	H	B	H	H	B	H	H	H	B	B	H	H	B	B	B	H	H	H	B	H	H	B	B	H	B	B	H	B	H	H	H	B	H	B	B
Squ12M	Sequ0900TUF	H	B	B	H	B	B	H	H	H	H	H	H	B	H	B	H	H	B	H	H	H	B	B	H	H	B	B	B	H	H	H	B	H	H	B	B	H	B	B	H	B	H	H	H	B	H	B	B
Squ12M	Sequ2379BAC	H	B	B	H	B	B	H	H	H	H	H	H	B	H	B	H	H	B	H	H	H	B	B	H	H	B	B	B	H	H	H	B	H	H	B	B	H	B	B	H	B	H	H	H	B	H	B	B
Squ12M	Sequ2476BAC	H	B	B	H	B	B	H	H	H	H	H	H	B	H	B	H	H	B	H	H	H	B	B	H	H	B	B	B	H	H	H	B	H	H	B	B	H	B	B	H	B	H	H	H	B	H	B	B
Squ12M	Sequ1015TUF	H	B	B	H	B	B	H	H	H	H	H	H	B	H	B	H	H	H	H	H	H	B	B	H	H	B	B	B	H	H	H	B	H	B	B	B	H	B	H	B	B	H	H	H	B	H	B	B
Squ12M	Sequ3151BAC	H	B	B	H	B	B	H	H	H	H	H	H	B	H	B	H	H	H	H	H	H	B	B	H	B	B	B	B	H	H	H	B	H	B	B	B	H	B	H	B	B	H	H	H	B	H	B	B
Squ12M	Sequ0861TUF	H	B	H	H	B	B	H	H	H	H	H	H	B	B	B	H	H	H	H	H	H	B	H	B	B	H	B	B	H	H	H	B	H	B	H	B	H	B	H	B	B	H	H	H	B	H	B	B
Squ12M	Sequ0230TUF	H	H	H	B	B	B	B	H	H	H	H	H	H	B	B	H	H	H	H	B	H	B	H	B	B	H	H	B	H	H	H	B	H	B	H	B	H	B	H	B	B	H	H	H	B	H	B	B
Squ12M	Sequ05002_2SNP	-	-	H	B	B	B	B	H	H	H	H	H	H	B	B	H	H	H	H	B	H	B	H	B	B	H	-	B	H	H	H	B	H	B	-	B	H	B	H	B	B	H	H	H	B	H	B	B
Squ12M	Sequ00361SNP	H	H	H	B	B	B	B	H	H	H	H	B	H	B	B	H	H	H	B	B	H	B	H	B	B	H	H	B	H	H	H	B	H	B	H	B	H	B	H	B	B	H	H	H	B	H	B	B
Squ12M	Sequ0328TUF	H	H	H	B	B	B	B	H	H	H	H	B	H	B	B	H	H	H	B	B	H	B	H	B	B	H	H	B	H	H	H	B	B	B	H	B	H	B	H	B	B	B	H	B	H	H	B	B
Squ12M	Sequ0216TUF	H	H	H	B	B	B	B	H	H	H	H	B	H	B	B	H	H	H	B	B	H	B	H	B	B	H	H	B	H	H	H	B	B	B	H	B	H	B	H	B	B	B	H	B	H	H	B	B
Squ12M	Sequ1248BAC	H	H	H	B	B	B	B	H	H	H	H	B	H	B	B	H	H	H	B	B	H	B	H	B	B	H	H	B	H	H	H	B	B	B	H	B	H	B	H	B	B	B	H	B	H	H	B	H
Squ13M	Sequ0144TUF	H	H	B	H	B	B	B	B	H	H	B	H	B	B	B	B	H	H	B	B	B	B	B	H	B	H	H	H	B	B	B	B	H	H	B	H	H	B	B	B	H	B	H	B	B	H	B	B
Squ13M	Sequ0186TUF	H	H	B	H	B	B	B	B	H	H	B	H	B	B	B	B	H	H	B	B	B	B	B	H	B	H	H	H	B	B	B	B	H	H	B	H	H	B	B	B	H	B	H	B	B	H	B	B
Squ13M	Sequ0205TUF	H	H	B	H	B	B	B	B	H	H	B	H	B	B	B	B	H	H	B	B	B	B	B	H	B	H	H	H	B	B	B	B	H	H	B	H	H	B	B	B	H	B	H	B	B	H	B	B
Squ13M	Sequ0717TUF	H	H	B	H	B	B	B	B	H	H	B	H	B	B	B	B	H	H	B	B	B	B	B	H	B	H	H	H	B	B	B	B	H	H	B	H	H	B	B	B	H	B	H	B	B	H	B	B
Squ13M	Sequ0966TUF	H	H	B	H	B	B	B	B	H	H	B	H	B	B	B	B	H	H	B	B	B	B	B	H	B	H	H	H	B	B	B	B	H	H	B	H	H	B	B	B	H	B	H	B	B	H	B	B
Squ13M	Sequ1055TUF	H	H	B	H	B	B	B	B	H	H	B	H	B	B	B	B	H	H	B	B	B	B	B	H	B	H	H	H	B	B	B	B	H	H	B	H	H	B	B	B	H	B	H	B	B	H	B	B
Squ13M	Sequ1210BAC	H	H	B	H	B	B	B	B	H	H	B	H	B	B	B	B	H	H	B	B	B	B	B	H	B	H	H	H	B	B	B	B	H	H	B	H	H	B	B	B	H	B	H	B	B	H	B	B
Squ13M	Sequ2737BAC	H	H	B	H	B	B	B	B	H	H	B	H	B	B	B	B	H	H	B	B	B	B	B	H	B	H	H	H	B	B	B	B	H	H	B	H	H	B	B	B	H	B	H	B	B	H	B	B
Squ13M	Sequ0799TUF	H	H	B	B	B	B	B	B	H	H	B	H	B	B	B	B	H	H	B	B	B	B	B	H	B	H	H	H	B	B	B	B	H	H	B	H	H	B	B	B	H	B	H	B	B	H	B	B
Squ13M	Sequ0942TUF	H	H	B	B	B	B	B	B	H	H	B	H	B	B	B	B	H	H	B	B	B	B	B	H	B	H	H	H	B	B	B	B	H	H	B	H	H	B	B	B	H	B	H	B	B	H	B	B
Squ13M	Sequ0964TUF	H	H	B	B	B	B	B	B	H	H	B	H	B	B	B	B	H	H	B	B	B	B	B	H	B	H	H	H	B	B	B	B	H	H	B	H	H	B	B	B	H	B	H	B	B	H	B	B
Squ13M	Sequ0837BAC	H	H	B	B	B	B	B	B	H	H	B	H	B	B	B	B	H	H	B	B	B	B	B	H	B	H	H	H	B	B	B	B	H	H	B	H	H	B	B	B	H	B	H	B	B	H	B	B
Squ13M	Sequ0201TUF	H	H	B	B	B	B	B	B	H	H	B	H	B	B	B	B	H	H	B	B	B	B	B	H	B	H	H	H	B	B	B	B	H	B	B	H	H	B	B	B	H	B	H	B	B	H	B	B
Squ13M	Sequ2851BAC	H	H	B	B	B	B	B	B	H	H	B	H	B	B	B	B	H	H	B	B	B	B	B	H	B	H	H	H	B	B	B	B	H	B	B	H	H	B	B	B	H	B	H	B	B	H	B	B
Squ13M	Sequ01827SNP	H	H	B	B	H	B	B	B	H	H	B	H	B	B	B	B	H	H	B	B	B	B	B	H	B	H	H	-	B	B	B	B	H	B	B	H	H	B	B	B	H	B	H	B	B	H	B	B
Squ13M	Sequ1052TUF	H	H	B	B	H	B	B	B	H	H	B	H	B	B	B	B	H	H	B	B	B	B	B	H	B	H	H	H	B	B	B	B	H	B	B	H	H	B	B	B	H	B	H	B	B	H	B	H
Squ13M	Sequ1007TUF	H	H	B	B	H	B	B	B	H	B	B	H	B	B	B	B	H	H	B	B	B	B	B	H	B	H	H	H	B	H	B	B	H	B	H	H	H	H	B	B	B	B	H	B	B	H	B	H
Squ13M	Sequ0189BAC	H	H	B	B	H	B	B	B	H	B	B	H	B	B	B	B	H	H	B	B	B	B	B	H	B	H	H	H	B	H	B	B	H	B	H	H	H	H	B	B	B	B	H	B	B	H	B	H
Squ13M	Sequ2861BAC	H	H	B	B	H	B	B	B	H	B	B	H	B	B	B	B	H	H	B	B	B	B	B	H	B	H	H	H	B	H	B	B	H	B	H	H	H	H	B	B	B	B	H	B	B	H	B	H
Squ13M	Sequ0536TUF	H	H	B	B	H	B	B	B	H	B	B	H	B	B	B	B	H	H	B	B	B	B	B	H	B	H	H	H	B	H	B	B	H	B	H	H	H	H	B	B	B	B	H	B	B	H	B	H
Squ13M	Sequ2821BAC	H	H	B	B	H	B	B	B	H	B	B	H	B	B	B	B	H	H	B	B	B	B	B	H	B	H	H	H	B	H	B	B	H	B	H	H	H	H	B	B	B	B	H	B	B	H	B	H
Squ13M	Sequ3198BAC	H	H	B	B	H	B	B	B	H	B	B	H	B	H	B	B	H	H	B	B	B	B	B	H	B	H	H	H	B	H	B	B	H	B	H	H	H	H	B	B	B	B	H	B	B	H	B	H
Squ13M	Sequ0834TUF	H	H	B	B	H	B	B	B	H	B	B	H	B	H	B	B	H	H	B	B	B	B	B	H	B	H	H	H	B	H	B	B	H	B	H	H	H	H	H	B	B	B	H	B	B	H	B	H
Squ13M	Sequ0280BAC	H	H	B	B	H	B	B	B	H	B	B	H	B	H	B	B	H	H	B	B	B	B	B	H	B	H	H	H	B	H	H	B	H	B	H	H	H	H	H	B	B	B	H	B	B	H	B	H
Squ13M	Sequ0184TUF	H	H	B	B	H	B	B	B	H	B	B	H	B	H	B	H	H	B	B	B	B	B	B	H	B	H	H	H	H	H	H	B	H	B	H	H	H	H	H	B	B	B	H	B	B	H	B	H
Squ13M	Sequ0936TUF	H	H	B	B	H	B	B	B	H	B	B	H	B	H	B	H	H	B	B	B	B	B	B	H	B	H	H	H	H	H	H	B	H	B	H	H	H	H	H	B	B	B	H	B	B	H	B	H
Squ14M	Sequ0109TUF	H	H	B	B	B	B	B	H	B	B	H	B	H	B	B	H	B	B	B	B	H	H	H	B	B	H	B	H	H	B	B	H	B	B	B	B	B	B	B	H	B	B	B	B	B	H	B	B
Squ14M	Sequ0591TUF	H	H	B	B	B	B	B	H	B	B	H	B	H	B	B	H	B	B	B	B	H	H	H	B	B	H	B	H	H	B	B	H	B	B	B	B	B	B	B	H	B	B	B	B	B	H	B	B
Squ14M	Sequ0624TUF	H	H	B	B	B	B	B	H	B	B	H	B	H	B	B	H	B	B	B	B	H	H	H	B	B	H	B	H	H	B	B	H	B	B	B	B	B	B	B	H	B	B	B	B	B	H	B	B
Squ14M	Sequ0842TUF	H	H	B	B	B	B	B	H	B	B	H	B	H	B	B	H	B	B	B	B	H	H	H	B	B	H	B	H	H	B	B	H	B	B	B	B	B	B	B	H	B	B	B	B	B	H	B	B
Squ14M	Sequ0013BAC	H	H	B	B	B	B	B	H	B	B	H	B	H	B	B	H	B	B	B	B	H	H	H	B	B	H	B	H	H	B	B	H	B	B	B	B	B	B	B	H	B	B	B	B	B	H	B	B
Squ14M	Sequ0860BAC	H	H	B	B	B	B	B	H	B	B	H	B	H	B	B	H	B	B	B	B	H	H	H	B	B	H	B	H	H	B	B	H	B	B	B	B	B	B	B	H	B	B	B	B	B	H	B	B
Squ14M	Sequ1660BAC	H	H	B	B	B	B	B	H	B	B	H	B	H	B	B	H	B	B	B	B	H	H	H	B	B	H	B	H	H	B	B	H	B	B	B	B	B	B	B	H	B	B	B	B	B	H	B	B
Squ14M	Sequ2221BAC	H	H	B	B	B	B	B	H	B	B	H	B	H	B	B	H	B	B	B	B	H	H	H	B	B	H	B	H	H	B	B	H	B	B	B	B	B	B	B	H	B	B	B	B	B	H	B	B
Squ14M	Sequ2466BAC	H	H	B	B	B	B	B	H	B	B	H	B	H	B	B	H	B	B	B	B	H	H	H	B	B	H	B	H	H	B	B	H	B	B	B	B	B	B	B	H	B	B	B	B	B	H	B	B
Squ14M	Sequ2544BAC	H	H	B	B	B	B	B	H	B	B	H	B	H	B	B	H	B	B	B	B	H	H	H	B	B	H	B	H	H	B	B	H	B	B	B	B	B	B	B	H	B	B	B	B	B	H	B	B
Squ14M	Sequ2887BAC	H	H	B	B	B	B	B	H	B	B	H	B	H	B	B	H	B	B	B	B	H	H	H	B	B	H	B	H	H	B	B	H	B	B	B	B	B	B	B	H	B	B	B	B	B	H	B	B
Squ14M	Sequ3303BAC	H	H	B	B	B	B	B	H	B	B	H	B	H	B	B	H	B	B	B	B	H	H	H	B	B	H	B	H	H	B	B	H	B	B	B	B	B	B	B	H	B	B	B	B	B	H	B	B
Squ14M	Sequ0501TUF	H	H	B	B	B	B	B	H	B	B	H	B	H	B	B	H	B	B	B	B	H	H	H	B	B	H	B	H	H	B	B	H	B	B	B	B	B	B	B	H	B	B	B	B	B	B	B	B
Squ14M	Sequ0539TUF	H	H	B	B	B	B	B	H	B	B	H	B	H	B	B	H	B	B	B	B	H	H	H	B	B	H	B	H	H	B	B	H	B	B	B	B	B	B	B	H	B	B	B	B	B	B	B	B
Squ14M	Sequ0579TUF	H	H	B	B	B	B	B	H	B	B	H	B	H	B	B	H	B	B	B	B	H	H	H	B	B	H	B	H	H	B	B	H	B	B	B	B	B	B	B	H	B	B	B	B	B	B	B	B
Squ14M	Sequ04939SNP	H	H	B	B	B	B	B	H	B	B	H	B	H	B	B	H	B	B	B	B	H	H	H	B	B	H	B	H	H	B	B	H	B	B	B	B	B	B	B	H	B	B	B	B	B	B	B	B
Squ14M	Sequ0013TUF	H	H	B	B	B	B	B	H	B	B	H	B	H	B	B	H	B	B	B	B	H	H	H	B	B	H	B	H	H	B	B	H	B	B	B	B	B	B	B	B	B	B	B	B	B	B	B	B
Squ14M	Sequ0035TUF	H	H	B	B	B	B	B	H	B	B	H	B	H	B	B	H	B	B	B	B	H	H	H	B	B	H	B	H	H	B	B	H	B	B	B	B	B	B	B	B	B	B	B	B	B	B	B	B
Squ14M	Sequ0568TUF	H	H	B	B	B	B	B	H	B	B	H	B	H	B	B	H	B	B	B	B	H	H	H	B	B	H	B	H	H	B	B	H	B	B	B	B	B	B	B	B	B	B	B	B	B	B	B	B
Squ14M	Sequ0682TUF	H	H	B	B	B	B	B	H	B	B	H	B	H	B	B	H	B	B	B	B	H	H	H	B	B	H	B	H	H	B	B	H	B	B	B	B	B	B	B	B	B	B	B	B	B	B	B	B
Squ14M	Sequ0855TUF	H	H	B	B	B	B	B	H	B	B	H	B	H	B	B	H	B	B	B	B	H	H	H	B	B	H	B	H	H	B	B	H	B	B	B	B	B	B	B	B	B	B	B	B	B	B	B	B
Squ14M	Sequ1021BAC	H	H	B	B	B	B	B	H	B	B	H	B	H	B	B	H	B	B	B	B	H	H	H	B	B	H	B	H	H	B	B	H	B	B	B	B	B	B	B	B	B	B	B	B	B	B	B	B
Squ14M	Sequ00477SNP	H	H	B	B	B	-	B	H	B	B	H	B	H	B	B	H	B	B	B	B	H	H	H	B	B	H	B	H	H	-	B	H	B	B	B	B	B	B	B	B	B	B	B	B	B	B	B	B
Squ14M	Sequ0397BAC	H	H	B	B	B	B	B	H	B	B	H	B	H	B	B	H	B	B	B	B	B	H	H	B	B	H	B	H	H	B	B	H	B	B	B	B	B	B	B	B	B	B	B	B	B	B	B	B
Squ14M	Sequ0056TUF	H	H	B	B	B	B	B	H	B	B	H	B	H	B	B	H	B	B	B	B	B	H	H	B	B	H	B	H	H	B	B	H	B	B	B	B	B	B	B	B	B	B	B	B	B	H	B	B
Squ14M	Sequ0789TUF	H	H	B	B	B	B	B	H	B	B	H	B	B	B	B	H	B	B	B	B	B	H	H	B	B	H	B	B	H	B	B	H	B	B	B	B	B	B	B	B	B	B	B	B	B	H	B	B
Squ14M	Sequ1117BAC	H	H	B	B	B	B	B	H	B	B	H	B	B	B	B	H	B	B	B	B	B	H	H	B	B	H	B	B	H	B	B	H	B	B	B	B	B	B	B	B	B	B	B	B	B	H	B	B
Squ14M	Sequ3069BAC	H	H	B	B	B	B	B	H	B	B	B	B	B	B	B	H	B	B	B	B	B	H	H	B	B	H	B	B	H	B	B	H	B	B	B	B	B	B	B	B	B	B	B	B	B	H	B	B
Squ14M	Sequ3275BAC	H	H	B	B	B	B	B	H	B	B	B	B	B	B	B	H	B	B	B	B	B	H	H	B	B	H	B	B	H	B	B	H	B	B	B	B	B	B	H	B	B	B	B	B	B	H	B	B
Squ14M	Sequ0937TUF	H	B	H	B	B	B	B	B	H	B	B	B	B	H	B	H	B	B	B	H	B	H	H	H	B	H	B	B	B	B	B	H	B	B	B	B	B	H	H	B	H	B	B	H	B	H	B	B
Squ14M	Sequ0077TUF	H	B	H	B	B	B	B	B	H	B	B	B	B	H	B	H	B	B	B	H	B	H	B	H	H	H	B	B	B	B	H	H	B	B	B	B	H	H	H	B	H	B	B	H	H	H	B	B
Squ14M	Sequ0775TUF	H	B	H	B	B	B	B	B	H	B	B	B	B	H	B	H	B	B	B	H	B	H	B	H	H	H	B	B	B	B	H	H	B	B	B	B	H	H	H	B	H	B	B	H	H	H	B	B
Squ14M	Sequ2378BAC	H	B	H	B	B	B	B	B	H	B	B	B	B	H	B	H	B	B	B	H	B	H	B	H	H	H	B	B	B	B	H	H	B	B	B	B	H	H	H	B	H	B	B	H	H	H	B	B
Squ14M	Sequ0559TUF	H	B	H	B	B	B	B	B	H	B	B	B	B	H	B	H	B	B	B	H	B	H	B	H	H	H	B	B	B	B	H	H	B	B	B	B	H	H	H	B	H	B	B	H	H	H	B	B
Squ14M	Sequ0840TUF	H	B	H	B	B	B	B	B	H	B	B	B	B	H	B	H	B	B	B	H	B	H	B	H	H	H	B	B	B	B	H	H	B	B	B	B	H	H	H	B	H	B	B	H	H	H	B	B
Squ14M	Sequ0933BAC	H	B	H	B	B	B	B	B	H	B	B	B	B	H	B	H	B	B	B	H	B	H	B	H	H	H	B	B	B	B	H	H	B	B	B	B	H	H	H	B	H	B	B	H	H	H	B	B
Squ15M	Sequ0226BTUF	B	B	H	B	H	B	B	B	H	H	H	B	B	B	H	B	B	B	H	B	H	H	B	B	B	B	H	B	H	H	H	H	H	B	B	H	B	B	B	B	B	B	B	B	B	H	B	B
Squ15M	Sequ0107TUF	B	B	H	B	H	B	B	B	H	H	H	B	B	B	H	B	B	B	H	B	H	H	B	B	B	B	H	B	H	H	H	H	H	B	B	H	B	B	B	B	B	B	B	B	B	H	B	B
Squ15M	Sequ0115TUF	B	B	H	B	H	B	B	B	H	H	H	B	B	B	H	B	B	B	H	B	H	H	B	B	B	B	H	B	H	H	H	H	H	B	B	H	B	B	B	B	B	B	B	B	B	H	B	B
Squ15M	Sequ0710TUF	B	B	H	B	H	B	B	B	H	H	H	B	B	B	H	B	B	B	H	B	H	H	B	B	B	B	H	B	H	H	H	H	H	B	B	H	B	B	B	B	B	B	B	B	B	H	B	B
Squ15M	Sequ0951TUF	B	B	H	B	H	B	B	B	H	H	H	B	B	B	H	B	B	B	H	B	H	H	B	B	B	B	H	B	H	H	H	H	H	B	B	H	B	B	B	B	B	B	B	B	B	H	B	B
Squ15M	Sequ0959TUF	B	B	H	B	H	B	B	B	H	H	H	B	B	B	H	B	B	B	H	B	H	H	B	B	B	B	H	B	H	H	H	H	H	B	B	H	B	B	B	B	B	B	B	B	B	H	B	B
Squ15M	Sequ0978TUF	B	B	H	B	H	B	B	B	H	H	H	B	B	B	H	B	B	B	H	B	H	H	B	B	B	B	H	B	H	H	H	H	H	B	B	H	B	B	B	B	B	B	B	B	B	H	B	B
Squ15M	Sequ1038TUF	B	B	H	B	H	B	B	B	H	H	H	B	B	B	H	B	B	B	H	B	H	H	B	B	B	B	H	B	H	H	H	H	H	B	B	H	B	B	B	B	B	B	B	B	B	H	B	B
Squ15M	Sequ0236BAC	B	B	H	B	H	B	B	B	H	H	H	B	B	B	H	B	B	B	H	B	H	H	B	B	B	B	H	B	H	H	H	H	H	B	B	H	B	B	B	B	B	B	B	B	B	H	B	B
Squ15M	Sequ0443BAC	B	B	H	B	H	B	B	B	H	H	H	B	B	B	H	B	B	B	H	B	H	H	B	B	B	B	H	B	H	H	H	H	H	B	B	H	B	B	B	B	B	B	B	B	B	H	B	B
Squ15M	Sequ0546BAC	B	B	H	B	H	B	B	B	H	H	H	B	B	B	H	B	B	B	H	B	H	H	B	B	B	B	H	B	H	H	H	H	H	B	B	H	B	B	B	B	B	B	B	B	B	H	B	B
Squ15M	Sequ0766BAC	B	B	H	B	H	B	B	B	H	H	H	B	B	B	H	B	B	B	H	B	H	H	B	B	B	B	H	B	H	H	H	H	H	B	B	H	B	B	B	B	B	B	B	B	B	H	B	B
Squ15M	Sequ1001BAC	B	B	H	B	H	B	B	B	H	H	H	B	B	B	H	B	B	B	H	B	H	H	B	B	B	B	H	B	H	H	H	H	H	B	B	H	B	B	B	B	B	B	B	B	B	H	B	B
Squ15M	Sequ1066BAC	B	B	H	B	H	B	B	B	H	H	H	B	B	B	H	B	B	B	H	B	H	H	B	B	B	B	H	B	H	H	H	H	H	B	B	H	B	B	B	B	B	B	B	B	B	H	B	B
Squ15M	Sequ1071BAC	B	B	H	B	H	B	B	B	H	H	H	B	B	B	H	B	B	B	H	B	H	H	B	B	B	B	H	B	H	H	H	H	H	B	B	H	B	B	B	B	B	B	B	B	B	H	B	B
Squ15M	Sequ1153BAC	B	B	H	B	H	B	B	B	H	H	H	B	B	B	H	B	B	B	H	B	H	H	B	B	B	B	H	B	H	H	H	H	H	B	B	H	B	B	B	B	B	B	B	B	B	H	B	B
Squ15M	Sequ1240BAC	B	B	H	B	H	B	B	B	H	H	H	B	B	B	H	B	B	B	H	B	H	H	B	B	B	B	H	B	H	H	H	H	H	B	B	H	B	B	B	B	B	B	B	B	B	H	B	B
Squ15M	Sequ1326BAC	B	B	H	B	H	B	B	B	H	H	H	B	B	B	H	B	B	B	H	B	H	H	B	B	B	B	H	B	H	H	H	H	H	B	B	H	B	B	B	B	B	B	B	B	B	H	B	B
Squ15M	Sequ1786BAC	B	B	H	B	H	B	B	B	H	H	H	B	B	B	H	B	B	B	H	B	H	H	B	B	B	B	H	B	H	H	H	H	H	B	B	H	B	B	B	B	B	B	B	B	B	H	B	B
Squ15M	Sequ2560BAC	B	B	H	B	H	B	B	B	H	H	H	B	B	B	H	B	B	B	H	B	H	H	B	B	B	B	H	B	H	H	H	H	H	B	B	H	B	B	B	B	B	B	B	B	B	H	B	B
Squ15M	Sequ2605BAC	B	B	H	B	H	B	B	B	H	H	H	B	B	B	H	B	B	B	H	B	H	H	B	B	B	B	H	B	H	H	H	H	H	B	B	H	B	B	B	B	B	B	B	B	B	H	B	B
Squ15M	Sequ0971TUF	B	B	H	B	H	B	B	B	H	H	H	B	B	B	H	B	B	B	H	B	H	H	B	B	B	B	H	B	H	H	B	H	H	B	B	H	B	B	B	B	B	B	B	B	B	H	B	B
Squ15M	Sequ01971SNP	B	B	H	B	H	B	B	B	H	H	H	B	B	B	H	B	B	B	H	B	H	H	B	B	B	B	H	B	H	H	H	H	H	B	B	H	B	B	B	B	B	B	B	B	B	H	B	B
Squ15M	Sequ0224TUF	B	B	H	B	H	B	B	B	H	H	H	B	B	B	H	B	B	B	H	B	H	H	B	B	B	B	H	B	H	H	B	H	H	B	B	H	B	B	B	B	B	B	B	B	B	H	B	B
Squ15M	Sequ0997TUF	B	B	H	B	H	B	B	B	H	H	H	B	B	B	H	B	B	B	H	B	H	H	B	B	B	B	H	B	H	H	B	H	H	B	B	H	B	B	B	B	B	B	B	B	B	H	B	B
Squ15M	Sequ2332BAC	B	B	H	B	H	B	B	B	H	H	H	B	B	B	H	B	B	B	H	B	H	H	B	B	B	B	H	B	H	H	B	H	H	B	B	H	B	B	B	B	B	B	B	B	B	H	B	B
Squ15M	Sequ3322BAC	B	B	H	B	H	B	B	B	H	H	H	B	B	B	H	B	B	B	H	B	H	H	B	B	H	B	H	B	B	H	B	H	H	B	B	H	B	B	B	B	B	B	B	B	B	H	B	B
Squ15M	Sequ0156TUF	B	B	H	B	H	B	H	B	H	H	H	B	B	B	H	B	B	B	H	B	H	H	B	B	H	B	H	B	B	H	B	H	H	B	B	H	B	B	B	B	B	B	B	B	B	B	B	B
Squ15M	Sequ0958TUF	B	B	H	B	H	B	H	B	H	H	H	B	B	B	H	B	B	B	H	B	H	H	B	B	H	B	H	B	B	H	B	H	H	B	B	H	B	B	B	B	B	B	B	B	B	B	B	B
Squ15M	Sequ1983BAC	B	B	H	B	H	B	H	B	H	H	H	B	B	B	H	B	B	B	H	B	H	H	B	B	H	B	H	B	B	H	B	H	H	B	B	H	B	B	B	B	B	B	B	B	B	B	B	B
Squ15M	Sequ0467BAC	B	B	H	B	H	B	H	B	H	H	H	B	B	B	H	B	B	B	H	B	H	H	B	B	H	B	H	B	B	H	B	H	H	B	B	H	B	B	B	B	B	B	H	B	B	B	B	B
Squ15M	Sequ00588SNP	B	B	-	-	-	B	H	B	H	H	H	B	B	B	H	B	B	B	H	B	H	H	B	B	H	-	H	B	B	H	B	H	H	B	B	H	B	B	B	B	B	B	H	B	B	B	B	B
Squ15M	Sequ03661SNP	B	B	H	B	H	B	H	B	H	H	H	B	B	B	H	B	B	B	H	B	H	H	B	B	H	B	H	B	B	H	B	H	H	B	B	H	B	B	B	B	-	B	H	B	-	B	B	B
Squ15M	Sequ0838TUF	B	B	H	B	H	B	H	B	H	H	H	B	B	B	H	B	B	B	H	B	H	H	B	B	H	B	H	B	B	H	B	H	H	B	B	H	B	B	B	B	B	B	H	B	B	B	B	B
Squ15M	Sequ0260TUF	B	B	H	B	H	B	H	B	H	H	H	B	B	B	H	B	B	B	H	B	B	H	B	B	H	B	H	B	B	H	B	B	H	B	B	H	B	B	B	B	B	B	H	B	H	B	B	B
Squ15M	Sequ0455TUF	B	H	B	B	H	B	H	B	H	H	H	B	B	B	H	B	H	B	B	B	B	H	H	B	H	B	H	B	B	H	B	B	H	B	B	H	H	H	H	B	H	B	H	B	H	B	B	B
Squ15M	Sequ0042TUF	B	H	B	H	H	B	H	B	H	H	H	B	B	B	H	B	H	B	B	B	B	H	H	B	H	B	H	B	B	H	B	B	H	B	B	H	H	H	H	B	H	B	H	B	H	B	B	B
Squ15M	Sequ0654TUF	B	H	B	H	H	B	H	B	H	H	H	B	B	B	H	B	H	B	B	B	B	H	H	B	H	B	H	B	B	H	B	B	H	B	B	H	H	H	H	B	H	B	H	B	H	B	B	B
Squ15M	Sequ04122_2SNP	B	H	B	H	H	B	H	B	H	H	H	B	B	B	B	B	H	B	B	B	B	H	H	B	H	H	H	B	B	B	B	B	H	B	B	H	H	H	H	B	H	B	H	B	H	B	B	H
Squ15M	Sequ0885TUF	B	H	B	H	H	B	H	B	H	H	H	B	B	B	B	H	H	B	B	B	B	H	H	B	H	H	H	B	B	B	H	B	H	B	B	H	H	H	H	B	H	B	H	B	H	B	B	H
Squ16M	Sequ0139TUF	B	B	B	H	B	H	B	B	H	H	B	H	H	B	B	H	H	B	B	B	B	H	H	H	H	B	B	B	B	B	B	B	B	H	B	H	B	H	B	H	H	H	H	H	H	B	H	B
Squ16M	Sequ0318TUF	B	B	B	H	B	H	B	B	H	H	B	H	H	B	B	H	H	B	B	B	B	H	H	H	H	B	B	B	B	B	B	B	B	H	B	H	B	H	B	H	H	H	H	H	H	B	H	B
Squ16M	Sequ0562TUF	B	B	B	H	B	H	B	B	H	H	B	H	H	B	B	H	H	B	B	B	B	H	H	H	H	B	B	B	B	B	B	B	B	H	B	H	B	H	B	H	H	H	H	H	H	B	H	B
Squ16M	Sequ0647TUF	B	B	B	H	B	H	B	B	H	H	B	H	H	B	B	H	H	B	B	B	B	H	H	H	H	B	B	B	B	B	B	B	B	H	B	H	B	H	B	H	H	H	H	H	H	B	H	B
Squ16M	Sequ0871TUF	B	B	B	H	B	H	B	B	H	H	B	H	H	B	B	H	H	B	B	B	B	H	H	H	H	B	B	B	B	B	B	B	B	H	B	H	B	H	B	H	H	H	H	H	H	B	H	B
Squ16M	Sequ0969TUF	B	B	B	H	B	H	B	B	H	H	B	H	H	B	B	H	H	B	B	B	B	H	H	H	H	B	B	B	B	B	B	B	B	H	B	H	B	H	B	H	H	H	H	H	H	B	H	B
Squ16M	Sequ3028BAC	B	B	B	H	B	H	B	B	H	H	B	H	H	B	B	H	H	B	B	B	B	H	H	H	H	B	B	B	B	B	B	B	B	H	B	H	B	H	B	H	H	H	H	H	H	B	H	B
Squ16M	Sequ3238BAC	B	B	B	H	B	H	B	B	H	H	B	H	H	B	B	H	H	B	B	B	B	H	H	H	H	B	B	B	B	B	B	B	B	H	B	H	B	H	B	H	H	H	H	H	H	B	H	B
Squ16M	Sequ0018TUF	B	B	B	H	B	H	B	B	H	H	B	H	H	B	B	H	H	B	B	B	B	H	H	H	H	B	B	B	B	B	B	B	B	B	B	H	B	H	B	H	H	H	H	H	H	B	H	B
Squ16M	Sequ0209TUF	B	B	B	H	B	H	B	B	H	H	B	H	H	B	B	H	H	B	B	B	B	H	H	H	H	B	B	B	B	B	B	B	B	B	B	H	B	H	B	H	H	H	H	H	H	B	H	B
Squ16M	Sequ1076BAC	B	B	B	H	B	H	B	B	H	H	B	H	H	B	B	H	H	B	B	B	B	H	H	H	H	B	B	B	B	B	B	B	B	B	B	H	B	H	B	H	H	H	H	H	H	B	H	B
Squ16M	Sequ2831BAC	B	B	B	H	B	H	B	B	H	H	B	H	H	B	B	H	H	B	B	B	B	H	H	H	H	B	B	B	B	B	B	B	B	B	B	H	B	H	B	H	H	H	H	H	H	B	H	B
Squ16M	Sequ0249BAC	B	B	B	H	B	H	B	B	H	H	B	H	H	B	H	H	H	B	B	B	B	H	H	H	H	B	B	B	B	B	B	B	B	B	B	H	B	H	B	H	H	H	H	H	H	B	H	B
Squ16M	Sequ0430TUF	B	B	H	H	B	H	B	B	H	H	B	H	H	H	H	H	H	B	B	B	B	H	H	H	H	B	B	B	B	B	B	B	B	H	B	H	B	H	B	H	H	H	H	H	H	B	H	B
Squ16M	Sequ0643TUF	B	B	H	H	B	H	B	B	H	H	B	H	H	H	H	H	H	B	B	B	B	H	H	H	H	B	B	B	B	B	B	B	B	H	B	H	B	H	B	H	H	H	H	H	H	B	H	B
Squ16M	Sequ0952TUF	B	B	H	H	B	H	B	B	H	H	B	H	H	H	H	H	H	B	B	B	B	H	H	H	H	B	B	B	B	B	B	B	B	H	B	H	B	H	B	H	H	H	H	H	H	B	H	B
Squ16M	Sequ0106BAC	B	B	H	H	B	H	B	B	H	H	B	H	H	H	H	H	H	B	B	B	B	H	H	H	H	B	B	B	B	B	B	B	B	H	B	H	B	H	B	H	H	H	H	H	H	B	H	B
Squ16M	Sequ0831TUF	B	B	H	H	B	H	B	B	H	H	B	H	H	H	H	H	H	B	H	B	B	H	H	H	H	B	B	B	B	B	B	B	B	H	B	H	B	H	B	H	H	H	H	H	H	B	H	B
Squ16M	Sequ0989BAC	B	B	H	H	B	H	B	B	H	H	B	H	H	H	H	H	H	B	H	B	B	H	H	H	H	B	B	B	B	B	B	B	B	H	B	H	B	H	B	H	H	H	H	H	H	B	H	B
Squ16M	Sequ2222BAC	B	B	H	H	B	H	B	B	H	H	B	H	H	H	H	H	H	B	H	B	B	H	H	H	H	B	B	B	B	B	B	B	B	H	B	H	B	H	B	H	H	H	H	H	H	B	B	B
Squ16M	Sequ1014TUF	B	B	H	H	B	H	B	B	H	H	B	H	H	H	H	H	H	B	H	B	B	H	H	H	H	B	B	B	B	B	B	B	B	H	B	H	B	H	B	H	H	H	H	H	H	B	B	B
Squ16M	Sequ0038TUF	B	B	H	H	B	B	B	B	H	H	B	H	H	H	H	H	H	B	H	B	B	H	H	H	H	B	B	B	B	H	B	H	B	H	B	H	B	H	B	H	H	H	B	H	H	B	B	B
Squ16M	Sequ0723TUF	B	B	H	H	B	B	H	B	H	H	H	H	B	H	H	H	H	B	H	B	H	H	H	B	B	B	B	B	B	H	B	H	B	H	B	H	B	H	B	H	H	H	B	H	H	B	B	B
Squ16M	Sequ01379SNP	B	B	H	H	H	B	H	B	H	-	H	H	B	H	H	B	H	B	H	B	H	H	B	B	B	B	B	B	B	H	B	H	B	H	B	H	B	H	B	H	H	H	B	H	H	H	B	B
Squ16M	Sequ0890TUF	B	B	H	H	H	B	H	B	H	H	H	H	B	H	H	B	H	B	H	B	H	H	B	B	B	B	B	B	B	H	B	H	B	H	B	H	B	H	H	H	H	H	B	H	H	H	B	B
Squ16M	Sequ1376BAC	B	B	H	H	H	B	H	B	H	H	H	H	B	H	H	B	H	B	H	B	H	H	B	B	B	B	B	H	B	H	B	H	B	H	B	H	B	H	H	H	H	H	B	H	H	H	B	B
Squ16M	Sequ0699BAC	B	B	H	H	H	B	H	B	B	H	H	H	B	H	B	B	H	B	H	B	H	H	B	B	B	B	B	H	B	H	B	H	B	H	B	H	B	H	H	H	H	H	B	H	H	H	B	B
Squ16M	Sequ00274SNP	B	B	H	H	H	B	H	B	B	H	H	H	B	H	B	B	H	B	H	B	H	H	B	B	B	B	B	H	B	H	B	H	B	H	B	H	B	H	H	H	H	H	B	H	H	H	B	B
Squ17M	Sequ1016TUF	B	H	H	H	B	B	B	H	H	B	H	B	B	B	H	H	H	H	B	H	B	B	B	H	B	B	B	H	B	H	B	H	H	H	B	B	B	B	H	H	B	B	B	B	B	B	H	B
Squ17M	Sequ0457TUF	B	H	H	H	B	B	B	B	B	B	H	B	B	B	B	B	H	H	B	H	B	B	B	H	B	H	B	H	B	H	B	H	H	H	B	B	B	B	H	H	B	B	H	B	B	B	H	B
Squ17M	Sequ1193BAC	B	H	H	H	B	B	B	B	B	B	H	B	B	B	B	B	H	H	B	H	B	B	B	H	B	H	B	H	B	H	B	H	H	H	B	B	B	B	H	H	B	B	H	B	B	B	H	B
Squ17M	Sequ0025TUF	B	B	H	H	B	B	B	B	B	B	H	B	B	H	B	B	H	H	B	H	B	B	B	B	B	H	B	H	B	H	B	H	H	H	B	B	B	B	H	H	B	B	H	B	B	B	B	B
Squ17M	Sequ0955TUF	B	B	H	H	H	B	B	B	B	B	H	B	H	H	B	B	H	H	B	H	B	B	B	B	B	H	B	H	H	H	H	H	H	H	B	B	B	B	H	H	B	B	H	B	B	B	B	B
Squ17M	Sequ0895TUF	B	B	H	H	H	B	B	B	B	B	H	B	H	H	B	B	H	H	B	B	H	B	B	B	B	H	B	H	H	H	H	B	H	H	B	B	B	B	H	H	B	B	H	B	B	H	B	B
Squ17M	Sequ0228TUF	B	B	H	H	H	B	B	B	B	B	H	B	H	H	B	B	H	H	B	B	H	B	B	B	B	H	B	H	H	H	H	B	H	H	B	B	B	B	H	H	B	B	H	B	B	H	H	B
Squ17M	Sequ3088BAC	B	B	B	H	H	B	B	B	B	B	H	B	H	H	B	B	H	H	B	B	H	B	B	B	B	H	B	H	H	H	H	B	H	H	B	B	B	B	H	H	B	B	H	B	B	H	B	B
Squ17M	Sequ0116TUF	B	B	B	H	H	B	B	B	B	B	H	B	H	H	B	B	H	H	B	B	H	B	B	B	B	H	B	H	H	H	H	B	H	H	B	B	B	B	H	H	B	B	H	B	B	H	B	B
Squ17M	Sequ0197TUF	B	B	B	H	H	B	B	B	B	B	H	B	H	H	B	B	H	H	B	B	H	B	B	B	B	H	B	H	H	H	H	B	H	H	B	B	B	B	H	H	B	B	H	B	B	H	B	B
Squ17M	Sequ0716TUF	B	B	B	H	H	B	B	B	B	B	H	B	H	H	B	B	H	H	B	B	H	B	B	B	B	H	B	H	H	H	H	B	H	H	B	B	B	B	H	H	B	B	H	B	B	H	B	B
Squ17M	Sequ0802TUF	B	B	B	H	H	B	B	B	B	B	H	B	H	H	B	B	H	H	B	B	H	B	B	B	B	H	B	H	H	H	H	B	H	H	B	B	B	B	H	H	B	B	H	B	B	H	B	B
Squ17M	Sequ1060TUF	B	B	B	H	H	B	B	B	B	B	H	B	H	H	B	B	H	H	B	B	H	B	B	B	B	H	B	H	H	H	H	B	H	H	B	B	B	B	H	H	B	B	H	B	B	H	B	B
Squ17M	Sequ0536BAC	B	B	B	H	H	B	B	B	B	B	H	B	H	H	B	B	H	H	B	B	H	B	B	B	B	H	B	H	H	H	H	B	H	H	B	B	B	B	H	H	B	B	H	B	B	H	B	B
Squ17M	Sequ0888BAC	B	B	B	H	H	B	B	B	B	B	H	B	H	H	B	B	H	H	B	B	H	B	B	B	B	H	B	H	H	H	H	B	H	H	B	B	B	B	H	H	B	B	H	B	B	H	B	B
Squ17M	Sequ1031BAC	B	B	B	H	H	B	B	B	B	B	H	B	H	H	B	B	H	H	B	B	H	B	B	B	B	H	B	H	H	H	H	B	H	H	B	B	B	B	H	H	B	B	H	B	B	H	B	B
Squ17M	Sequ1336BAC	B	B	B	H	H	B	B	B	B	B	H	B	H	H	B	B	H	H	B	B	H	B	B	B	B	H	B	H	H	H	H	B	H	H	B	B	B	B	H	H	B	B	H	B	B	H	B	B
Squ17M	Sequ1690BAC	B	B	B	H	H	B	B	B	B	B	H	B	H	H	B	B	H	H	B	B	H	B	B	B	B	H	B	H	H	H	H	B	H	H	B	B	B	B	H	H	B	B	H	B	B	H	B	B
Squ17M	Sequ2051BAC	B	B	B	H	H	B	B	B	B	B	H	B	H	H	B	B	H	H	B	B	H	B	B	B	B	H	B	H	H	H	H	B	H	H	B	B	B	B	H	H	B	B	H	B	B	H	B	B
Squ17M	Sequ2219BAC	B	B	B	H	H	B	B	B	B	B	H	B	H	H	B	B	H	H	B	B	H	B	B	B	B	H	B	H	H	H	H	B	H	H	B	B	B	B	H	H	B	B	H	B	B	H	B	B
Squ17M	Sequ2269BAC	B	B	B	H	H	B	B	B	B	B	H	B	H	H	B	B	H	H	B	B	H	B	B	B	B	H	B	H	H	H	H	B	H	H	B	B	B	B	H	H	B	B	H	B	B	H	B	B
Squ17M	Sequ2270BAC	B	B	B	H	H	B	B	B	B	B	H	B	H	H	B	B	H	H	B	B	H	B	B	B	B	H	B	H	H	H	H	B	H	H	B	B	B	B	H	H	B	B	H	B	B	H	B	B
Squ17M	Sequ2942BAC	B	B	B	H	H	B	B	B	B	B	H	B	H	H	B	B	H	H	B	B	H	B	B	B	B	H	B	H	H	H	H	B	H	H	B	B	B	B	H	H	B	B	H	B	B	H	B	B
Squ17M	Sequ00008SNP	B	B	B	H	H	B	B	B	B	B	H	B	H	H	B	B	H	H	B	B	H	B	B	B	B	H	B	H	H	H	H	B	H	H	B	B	B	B	H	H	B	B	H	B	B	H	B	B
Squ17M	Sequ00515SNP	B	B	B	H	H	B	B	B	B	B	H	B	H	H	B	B	H	H	B	B	H	B	B	B	B	H	B	H	H	H	H	B	H	H	B	B	B	B	H	H	B	B	H	B	B	H	B	B
Squ18M	Sequ0558TUF	B	B	B	B	B	H	B	H	H	B	B	B	H	B	B	H	B	H	B	B	H	B	H	H	B	H	H	H	B	H	B	B	H	B	B	H	B	B	H	H	B	B	B	B	B	H	H	H
Squ18M	Sequ0595TUF	B	B	B	B	B	H	B	H	H	B	B	B	H	B	B	H	B	H	B	B	H	B	H	H	B	H	H	H	B	H	B	B	H	B	B	H	B	B	H	H	B	B	B	B	B	H	H	H
Squ18M	Sequ0640TUF	B	B	B	B	B	H	B	H	H	B	B	B	H	B	B	H	B	H	B	B	H	B	H	H	B	H	H	H	B	H	B	B	H	B	B	H	B	B	H	H	B	B	B	B	B	H	H	H
Squ18M	Sequ0762TUF	B	B	B	B	B	H	B	H	H	B	B	B	H	B	B	H	B	H	B	B	H	B	H	H	B	H	H	H	B	H	B	B	H	B	B	H	B	B	H	H	B	B	B	B	B	H	H	H
Squ18M	Sequ0857TUF	B	B	B	B	B	H	B	H	H	B	B	B	H	B	B	H	B	H	B	B	H	B	H	H	B	H	H	H	B	H	B	B	H	B	B	H	B	B	H	H	B	B	B	B	B	H	H	H
Squ18M	Sequ0981TUF	B	B	B	B	B	H	B	H	H	B	B	B	H	B	B	H	B	H	B	B	H	B	H	H	B	H	H	H	B	H	B	B	H	B	B	H	B	B	H	H	B	B	B	B	B	H	H	H
Squ18M	Sequ0983TUF	B	B	B	B	B	H	B	H	H	B	B	B	H	B	B	H	B	H	B	B	H	B	H	H	B	H	H	H	B	H	B	B	H	B	B	H	B	B	H	H	B	B	B	B	B	H	H	H
Squ18M	Sequ0995TUF	B	B	B	B	B	H	B	H	H	B	B	B	H	B	B	H	B	H	B	B	H	B	H	H	B	H	H	H	B	H	B	B	H	B	B	H	B	B	H	H	B	B	B	B	B	H	H	H
Squ18M	Sequ1010TUF	B	B	B	B	B	H	B	H	H	B	B	B	H	B	B	H	B	H	B	B	H	B	H	H	B	H	H	H	B	H	B	B	H	B	B	H	B	B	H	H	B	B	B	B	B	H	H	H
Squ18M	Sequ0499BAC	B	B	B	B	B	H	B	H	H	B	B	B	H	B	B	H	B	H	B	B	H	B	H	H	B	H	H	H	B	H	B	B	H	B	B	H	B	B	H	H	B	B	B	B	B	H	H	H
Squ18M	Sequ0896BAC	B	B	B	B	B	H	B	H	H	B	B	B	H	B	B	H	B	H	B	B	H	B	H	H	B	H	H	H	B	H	B	B	H	B	B	H	B	B	H	H	B	B	B	B	B	H	H	H
Squ18M	Sequ0921BAC	B	B	B	B	B	H	B	H	H	B	B	B	H	B	B	H	B	H	B	B	H	B	H	H	B	H	H	H	B	H	B	B	H	B	B	H	B	B	H	H	B	B	B	B	B	H	H	H
Squ18M	Sequ1207BAC	B	B	B	B	B	H	B	H	H	B	B	B	H	B	B	H	B	H	B	B	H	B	H	H	B	H	H	H	B	H	B	B	H	B	B	H	B	B	H	H	B	B	B	B	B	H	H	H
Squ18M	Sequ1444BAC	B	B	B	B	B	H	B	H	H	B	B	B	H	B	B	H	B	H	B	B	H	B	H	H	B	H	H	H	B	H	B	B	H	B	B	H	B	B	H	H	B	B	B	B	B	H	H	H
Squ18M	Sequ1719BAC	B	B	B	B	B	H	B	H	H	B	B	B	H	B	B	H	B	H	B	B	H	B	H	H	B	H	H	H	B	H	B	B	H	B	B	H	B	B	H	H	B	B	B	B	B	H	H	H
Squ18M	Sequ2460BAC	B	B	B	B	B	H	B	H	H	B	B	B	H	B	B	H	B	H	B	B	H	B	H	H	B	H	H	H	B	H	B	B	H	B	B	H	B	B	H	H	B	B	B	B	B	H	H	H
Squ18M	Sequ2673BAC	B	B	B	B	B	H	B	H	H	B	B	B	H	B	B	H	B	H	B	B	H	B	H	H	B	H	H	H	B	H	B	B	H	B	B	H	B	B	H	H	B	B	B	B	B	H	H	H
Squ18M	Sequ2828BAC	B	B	B	B	B	H	B	H	H	B	B	B	H	B	B	H	B	H	B	B	H	B	H	H	B	H	H	H	B	H	B	B	H	B	B	H	B	B	H	H	B	B	B	B	B	H	H	H
Squ18M	Sequ02164SNP	B	B	B	B	B	H	B	H	H	B	B	B	H	B	B	H	B	H	B	B	H	B	H	H	B	H	H	H	B	H	B	B	H	B	B	H	B	B	H	H	B	B	B	B	B	H	H	H
Squ18M	Sequ3144BAC	B	B	B	B	B	H	B	H	H	B	B	B	B	B	B	H	B	H	B	B	H	B	H	H	B	H	H	H	B	H	B	B	H	B	B	H	B	B	H	H	B	B	B	B	B	H	H	H
Squ18M	Sequ0919TUF	B	B	B	B	B	H	B	H	H	B	B	B	B	B	H	H	B	H	B	B	H	B	H	H	B	H	H	H	B	H	B	B	H	B	B	H	B	B	B	H	H	B	B	B	B	H	H	H
Squ18M	Sequ00006SNP	B	B	B	B	B	H	B	H	H	B	B	B	B	B	H	H	B	H	B	B	H	B	H	H	B	H	H	H	B	H	B	B	H	B	B	H	B	B	B	H	H	B	B	B	B	H	H	H
Squ18M	Sequ0631TUF	B	B	B	B	B	H	B	H	H	H	B	B	B	B	H	H	H	H	B	B	H	H	H	H	B	B	H	H	B	H	B	B	H	B	B	H	B	B	B	H	H	B	B	B	B	H	H	H
Squ18M	Sequ2713BAC	B	B	B	B	B	H	B	H	H	H	B	B	B	B	H	H	H	H	B	B	H	H	H	H	B	B	H	H	B	H	B	B	H	B	B	H	B	B	B	H	H	B	B	B	B	H	H	H
Squ18M	Sequ3003BAC	B	H	B	B	B	H	B	H	H	H	B	B	B	B	H	H	H	H	B	B	H	H	H	H	H	B	H	H	B	H	B	B	H	B	H	H	B	B	B	H	H	B	H	B	B	H	H	H
Squ18M	Sequ3301BAC	B	H	B	B	B	H	B	H	H	H	B	B	B	B	H	H	H	H	B	B	H	H	H	H	H	B	H	H	B	H	B	B	H	B	H	H	B	B	B	H	H	B	H	B	B	H	H	H
Squ18M	Sequ0771TUF	B	H	B	B	B	H	B	H	B	H	B	B	B	B	H	H	H	H	B	B	H	H	H	H	H	B	H	H	B	H	B	B	H	B	H	H	B	B	B	H	H	B	H	B	H	H	H	H
Squ18M	Sequ0217TUF	B	H	H	B	B	H	B	H	B	H	B	B	B	B	H	H	H	H	B	H	H	H	H	B	H	B	H	H	B	H	B	B	H	H	H	H	B	H	B	B	H	B	H	H	H	H	H	H
Squ18M	Sequ1115BAC	B	H	H	B	B	H	B	H	B	H	B	B	B	H	H	H	H	H	B	H	H	H	H	B	H	B	H	H	B	H	H	B	H	H	H	H	B	H	B	B	H	B	H	H	H	H	B	B
Squ18M	Sequ3074BAC	B	H	H	B	B	H	B	H	B	H	B	B	B	H	H	H	H	H	B	H	H	H	H	B	H	B	H	H	B	H	H	B	H	H	H	H	B	H	B	B	H	B	H	H	H	H	B	B
Squ18M	Sequ0029TUF	B	H	H	B	B	H	B	H	B	H	B	B	B	H	H	H	H	H	B	H	B	H	H	B	H	B	H	H	B	H	H	B	H	H	H	H	B	H	B	B	H	B	H	H	H	H	B	B
Squ18M	Sequ1849BAC	B	H	H	B	B	H	B	H	B	H	B	B	B	H	H	H	H	H	B	H	B	H	H	B	H	B	H	H	H	H	H	B	H	H	H	B	B	H	B	B	H	B	H	H	H	H	B	B
Squ18M	Sequ0614TUF	B	H	H	B	B	H	H	H	B	H	B	B	B	H	H	H	H	H	B	H	B	H	H	B	H	B	H	H	H	H	H	B	H	H	H	B	B	H	B	B	H	B	H	H	H	H	B	B
Squ18M	Sequ0790TUF	B	H	H	B	B	H	H	H	B	H	B	B	B	H	H	H	H	H	B	H	B	H	H	B	H	B	H	H	H	H	H	B	H	H	H	B	B	H	B	B	H	B	H	H	H	H	B	B
Squ18M	Sequ0421TUF	B	H	H	B	B	H	H	H	B	H	B	B	B	H	H	H	H	H	B	H	B	H	H	B	H	B	H	H	H	H	H	B	H	H	H	B	B	H	B	B	H	B	H	H	H	H	B	B
Squ19M	Sequ0506TUF	B	B	B	B	B	H	B	B	B	B	B	B	B	H	B	B	H	H	B	B	B	H	B	B	B	H	B	B	B	B	H	H	B	B	B	H	H	B	H	B	H	B	H	B	H	H	H	B
Squ19M	Sequ0993TUF	B	B	B	B	B	H	B	B	B	B	B	B	B	H	B	B	H	H	B	B	B	H	B	B	B	H	B	B	B	B	H	H	B	B	B	H	H	B	H	B	H	B	H	B	H	H	H	B
Squ19M	Sequ0783TUF	B	B	B	B	B	H	B	B	B	B	B	H	B	H	B	B	H	H	B	B	B	B	B	B	B	H	B	B	H	B	H	H	B	H	H	H	H	B	H	B	H	B	H	B	H	H	H	B
Squ19M	Sequ2114BAC	B	B	B	B	B	H	B	B	B	B	B	H	B	H	B	B	H	H	H	B	B	B	B	B	B	H	H	B	H	B	H	H	B	H	H	H	H	B	H	B	H	B	H	B	H	B	H	B
Squ19M	Sequ2697BAC	B	B	B	B	B	H	B	B	B	B	B	H	B	H	B	B	H	H	H	B	B	B	B	B	B	H	H	B	H	B	H	H	B	H	H	H	H	B	H	B	H	B	H	B	H	B	H	B
Squ19M	Sequ02890SNP	B	B	H	B	B	H	B	B	B	B	B	H	B	H	B	B	H	H	H	B	B	B	B	B	B	H	H	B	H	B	H	H	B	H	H	H	H	B	H	B	H	B	H	B	H	B	H	B
Squ19M	Sequ0748TUF	H	B	H	B	B	H	B	B	B	B	H	H	B	H	B	B	H	B	H	B	B	B	B	B	B	B	H	B	H	B	H	B	H	H	H	B	H	B	B	B	H	B	H	B	H	B	H	B
Squ19M	Sequ0943TUF	H	B	H	H	B	H	B	B	B	B	H	H	B	H	B	B	H	B	H	H	B	B	B	B	B	B	H	B	H	H	H	B	H	H	H	B	H	B	B	B	H	B	H	H	H	B	H	B
Squ19M	Sequ0680TUF	H	B	H	H	B	H	B	B	B	H	H	H	B	H	H	B	H	B	H	H	B	B	B	B	H	B	H	B	H	H	H	B	H	H	H	B	H	B	B	B	H	B	H	H	H	B	B	B
Squ19M	Sequ1762BAC	H	B	H	H	B	H	B	B	B	H	H	H	B	H	H	B	H	B	H	H	B	B	B	B	H	B	H	B	H	H	H	B	H	H	H	B	H	B	B	B	H	B	H	H	H	B	B	B
Squ19M	Sequ1238BAC	H	B	H	H	B	H	B	B	B	H	H	H	B	H	H	B	H	B	H	H	B	B	B	B	H	B	H	B	H	H	H	B	H	H	H	B	H	B	B	B	H	B	H	H	H	B	B	B
Squ19M	Sequ2771BAC	H	B	H	H	B	H	B	B	B	H	H	H	B	H	H	B	H	B	H	H	B	B	B	B	H	B	H	B	H	H	H	B	H	H	H	B	H	B	B	B	H	B	H	H	H	B	B	B
Squ19M	Sequ00492SNP	H	B	H	H	B	H	B	B	B	H	H	H	B	H	H	B	H	B	H	H	B	B	B	B	H	B	H	B	H	H	H	B	H	H	H	B	H	B	B	B	H	B	H	H	H	B	B	B
Squ19M	Sequ2714BAC	H	B	H	H	B	H	B	B	B	H	H	H	H	H	H	B	H	B	H	H	B	B	B	B	H	B	H	B	H	H	H	B	H	H	H	B	H	B	B	B	H	B	H	H	H	B	B	B
Squ19M	Sequ0138BAC	H	B	H	H	B	H	B	B	B	H	H	H	H	H	H	B	H	B	H	H	B	B	B	B	H	B	H	B	H	H	H	B	H	H	H	B	H	B	B	B	H	B	H	H	B	B	B	B
Squ19M	Sequ1527BAC	H	B	H	H	B	H	B	B	B	H	H	H	H	H	H	B	H	B	H	H	B	B	B	B	H	B	H	B	H	H	H	B	H	H	H	B	H	B	B	B	H	B	H	H	B	B	B	B
Squ19M	Sequ02307SNP	H	B	H	H	B	H	B	B	B	H	H	H	H	H	H	B	H	B	H	H	B	B	B	B	H	B	H	B	H	H	H	B	H	H	H	B	H	B	B	B	H	B	H	H	B	B	B	B
Squ19M	Sequ0435TUF	H	B	H	H	B	H	B	B	B	H	H	H	H	H	H	B	H	B	H	H	B	B	B	B	H	B	H	B	H	H	H	B	H	H	H	B	H	B	B	B	H	B	H	B	B	B	B	B
Squ19M	Sequ0739TUF	H	B	H	H	B	H	B	B	B	H	H	H	H	H	H	B	H	B	H	H	B	B	B	B	H	B	H	B	H	H	H	B	H	H	H	B	H	B	B	B	H	B	H	B	B	B	B	B
Squ19M	Sequ0181TUF	H	B	H	H	B	H	B	B	B	H	H	H	H	H	H	B	H	B	H	H	B	B	B	B	H	B	H	B	H	H	H	B	H	H	H	B	H	B	B	B	H	B	H	B	B	B	B	B
Squ19M	Sequ0823TUF	H	B	H	H	B	H	B	B	B	H	H	H	H	H	H	B	H	B	H	H	B	B	B	B	H	B	H	B	H	H	H	B	H	H	H	B	H	B	B	B	H	B	H	B	B	B	B	B
Squ19M	Sequ0305TUF	H	B	H	H	B	H	B	B	B	H	H	H	H	H	H	B	H	B	H	H	B	B	H	B	H	B	H	B	H	H	H	B	H	H	H	B	H	B	B	B	H	B	H	B	B	B	B	B
Squ19M	Sequ0550TUF	H	B	H	H	B	H	B	B	B	H	H	H	H	H	H	B	H	B	H	H	B	B	H	B	H	B	H	B	H	H	H	B	H	H	H	B	H	B	B	B	H	B	H	B	B	B	B	B
Squ19M	Sequ0639TUF	H	B	H	H	B	H	B	B	B	H	H	H	H	H	H	B	H	B	H	H	B	B	H	B	H	B	H	B	H	H	H	B	H	H	H	B	H	B	B	B	H	B	H	B	B	B	B	B
Squ19M	Sequ0905TUF	H	B	H	H	B	H	B	B	B	H	H	H	H	H	H	B	H	B	H	H	B	B	H	B	H	B	H	B	H	H	H	B	H	H	H	B	H	B	B	B	H	B	H	B	B	B	B	B
Squ19M	Sequ0607BAC	H	B	H	H	B	H	B	B	B	H	H	H	H	H	H	B	H	B	H	H	B	B	H	B	H	B	H	B	H	H	H	B	H	H	H	B	H	B	B	B	H	B	H	B	B	B	B	B
Squ19M	Sequ1246BAC	H	B	H	H	B	H	B	B	B	H	H	H	H	H	H	B	H	B	H	H	B	B	H	B	H	B	H	B	H	H	H	B	H	H	H	B	H	B	B	B	H	B	H	B	B	B	B	B
Squ19M	Sequ2865BAC	H	B	H	H	B	H	B	B	B	H	H	H	H	H	H	B	H	B	H	H	B	B	H	B	H	B	H	B	H	H	H	B	H	H	H	B	H	B	B	B	H	B	H	B	B	B	B	B
Squ19M	Sequ2968BAC	H	B	H	H	B	H	B	B	B	H	H	H	H	H	H	B	H	B	H	H	B	B	H	B	H	B	H	B	H	H	H	B	H	H	H	B	H	B	B	B	H	B	H	B	B	B	B	B
Squ19M	Sequ00402SNP	-	B	H	H	B	H	B	B	B	H	H	H	H	H	H	B	H	B	H	H	B	B	H	B	H	B	H	B	H	H	H	B	H	H	H	B	H	B	B	B	H	B	H	B	B	B	B	B
Squ19M	Sequ02667SNP	H	B	H	H	B	H	B	B	B	H	H	H	H	H	H	B	H	B	H	H	B	B	H	B	H	B	H	B	H	H	H	B	-	H	H	B	H	B	B	B	H	B	H	B	B	B	B	B
Squ20M	Sequ0234TUF	B	B	B	H	B	B	H	B	B	H	H	B	B	B	H	H	B	H	H	B	B	B	B	H	B	B	H	B	B	B	B	B	H	B	H	B	B	B	B	H	B	H	B	B	H	B	H	B
Squ20M	Sequ0288TUF	B	B	B	H	B	B	H	B	B	H	H	B	B	B	H	H	B	H	H	B	B	B	B	H	B	B	H	B	B	B	B	B	H	B	H	B	B	B	B	H	B	H	B	B	H	B	H	B
Squ20M	Sequ0605TUF	B	B	B	H	B	B	H	B	B	H	H	B	B	B	H	H	B	H	H	B	B	B	B	H	B	B	H	B	B	B	B	B	H	B	H	B	B	B	B	H	B	H	B	B	H	B	H	B
Squ20M	Sequ0666TUF	B	B	B	H	B	B	H	B	B	H	H	B	B	B	H	H	B	H	H	B	B	B	B	H	B	B	H	B	B	B	B	B	H	B	H	B	B	B	B	H	B	H	B	B	H	B	H	B
Squ20M	Sequ0730TUF	B	B	B	H	B	B	H	B	B	H	H	B	B	B	H	H	B	H	H	B	B	B	B	H	B	B	H	B	B	B	B	B	H	B	H	B	B	B	B	H	B	H	B	B	H	B	H	B
Squ20M	Sequ0812TUF	B	B	B	H	B	B	H	B	B	H	H	B	B	B	H	H	B	H	H	B	B	B	B	H	B	B	H	B	B	B	B	B	H	B	H	B	B	B	B	H	B	H	B	B	H	B	H	B
Squ20M	Sequ1077TUF	B	B	B	H	B	B	H	B	B	H	H	B	B	B	H	H	B	H	H	B	B	B	B	H	B	B	H	B	B	B	B	B	H	B	H	B	B	B	B	H	B	H	B	B	H	B	H	B
Squ20M	Sequ1079TUF	B	B	B	H	B	B	H	B	B	H	H	B	B	B	H	H	B	H	H	B	B	B	B	H	B	B	H	B	B	B	B	B	H	B	H	B	B	B	B	H	B	H	B	B	H	B	H	B
Squ20M	Sequ0017BAC	B	B	B	H	B	B	H	B	B	H	H	B	B	B	H	H	B	H	H	B	B	B	B	H	B	B	H	B	B	B	B	B	H	B	H	B	B	B	B	H	B	H	B	B	H	B	H	B
Squ20M	Sequ0636BAC	B	B	B	H	B	B	H	B	B	H	H	B	B	B	H	H	B	H	H	B	B	B	B	H	B	B	H	B	B	B	B	B	H	B	H	B	B	B	B	H	B	H	B	B	H	B	H	B
Squ20M	Sequ0664BAC	B	B	B	H	B	B	H	B	B	H	H	B	B	B	H	H	B	H	H	B	B	B	B	H	B	B	H	B	B	B	B	B	H	B	H	B	B	B	B	H	B	H	B	B	H	B	H	B
Squ20M	Sequ1121BAC	B	B	B	H	B	B	H	B	B	H	H	B	B	B	H	H	B	H	H	B	B	B	B	H	B	B	H	B	B	B	B	B	H	B	H	B	B	B	B	H	B	H	B	B	H	B	H	B
Squ20M	Sequ1161BAC	B	B	B	H	B	B	H	B	B	H	H	B	B	B	H	H	B	H	H	B	B	B	B	H	B	B	H	B	B	B	B	B	H	B	H	B	B	B	B	H	B	H	B	B	H	B	H	B
Squ20M	Sequ1702BAC	B	B	B	H	B	B	H	B	B	H	H	B	B	B	H	H	B	H	H	B	B	B	B	H	B	B	H	B	B	B	B	B	H	B	H	B	B	B	B	H	B	H	B	B	H	B	H	B
Squ20M	Sequ1834BAC	B	B	B	H	B	B	H	B	B	H	H	B	B	B	H	H	B	H	H	B	B	B	B	H	B	B	H	B	B	B	B	B	H	B	H	B	B	B	B	H	B	H	B	B	H	B	H	B
Squ20M	Sequ2312BAC	B	B	B	H	B	B	H	B	B	H	H	B	B	B	H	H	B	H	H	B	B	B	B	H	B	B	H	B	B	B	B	B	H	B	H	B	B	B	B	H	B	H	B	B	H	B	H	B
Squ20M	Sequ1989BAC	B	B	B	H	B	B	H	B	B	B	H	B	B	B	H	H	B	H	H	B	B	B	B	H	B	B	H	B	B	B	B	B	H	B	H	B	B	B	B	H	B	H	B	B	H	B	H	B
Squ20M	Sequ0836TUF	B	B	B	B	B	B	H	B	B	B	H	B	B	B	H	H	B	H	H	B	B	B	B	H	B	B	H	B	B	B	B	B	H	B	H	B	B	B	B	H	B	H	B	B	H	B	H	B
Squ20M	Sequ0829TUF	B	B	B	B	B	B	H	B	B	B	H	B	B	B	H	H	B	H	H	B	B	B	B	H	B	B	H	B	B	B	B	B	H	B	H	B	B	B	B	H	B	H	B	B	H	B	H	B
Squ20M	Sequ0596BAC	B	B	B	B	B	B	H	B	B	B	H	B	B	B	H	H	B	H	H	B	B	B	B	H	B	B	H	B	B	B	B	B	H	B	H	B	B	B	B	H	B	H	B	B	H	B	H	B
Squ20M	Sequ03904SNP	H	B	H	B	B	B	H	B	B	B	H	B	B	B	H	H	B	H	H	B	B	B	B	H	B	B	H	B	B	B	B	B	B	H	H	B	B	B	B	H	B	H	B	B	H	B	H	B
Squ20M	Sequ02745SNP	H	B	H	B	B	B	H	B	B	B	H	B	B	B	H	H	B	H	H	B	B	B	B	H	B	B	H	B	B	B	B	B	B	H	H	B	B	B	B	H	B	H	B	B	H	B	H	B
Squ20M	Sequ0537TUF	H	B	H	B	B	B	H	B	B	B	H	B	B	B	H	H	B	H	H	B	B	B	B	H	B	B	H	B	B	B	B	B	B	H	H	B	H	B	B	H	B	H	B	B	H	B	H	B
Squ20M	Sequ1076TUF	H	B	H	B	B	B	H	H	B	B	H	B	B	B	H	H	B	H	H	H	B	B	B	H	B	B	H	B	B	H	B	B	B	H	H	B	H	B	B	H	B	B	B	H	H	B	H	B
Squ20M	Sequ2645BAC	H	B	H	B	B	B	H	H	B	B	H	B	B	B	H	H	B	H	H	H	B	B	B	H	B	B	H	B	B	H	B	B	B	H	H	B	H	H	B	H	B	B	B	H	H	B	H	B
Squ20M	Sequ1073TUF	H	B	H	B	B	B	H	H	B	B	H	B	B	B	H	H	B	H	B	H	B	B	B	H	B	B	H	B	B	H	B	B	B	H	H	B	H	H	B	H	B	B	B	H	H	B	H	B
Squ20M	Sequ2569BAC	H	B	H	B	B	B	H	H	B	B	H	B	B	B	H	H	B	H	B	H	B	B	B	H	B	B	H	B	B	H	B	B	B	H	H	B	H	H	B	H	B	B	B	H	H	B	H	B
Squ20M	Sequ0938TUF	H	B	H	B	B	B	H	H	B	B	H	B	B	B	H	H	B	H	B	H	B	B	B	H	B	B	H	B	B	H	H	B	B	H	B	B	H	H	B	H	B	B	B	H	H	B	H	B
Squ20M	Sequ3071BAC	H	B	H	B	B	B	H	H	B	B	H	B	B	B	H	H	B	H	B	H	B	B	B	H	B	B	H	B	B	H	H	B	B	H	B	B	H	H	B	H	B	B	B	H	H	B	H	B
Squ20M	Sequ1072TUF	H	H	H	B	B	B	H	H	B	B	H	B	B	B	H	H	B	H	B	H	B	B	B	H	B	B	H	B	B	H	H	B	B	H	B	B	H	H	B	H	B	B	B	H	H	H	H	B
Squ20M	Sequ2134BAC	H	H	H	B	B	B	H	H	B	B	B	B	B	B	H	H	B	H	B	H	B	B	B	B	B	B	H	B	B	H	H	B	B	H	B	B	H	H	B	H	B	B	B	H	B	H	H	B
Squ20M	Sequ0439TUF	H	H	H	B	B	B	H	H	B	B	B	B	B	B	H	H	B	H	B	H	B	B	B	B	B	B	H	B	B	H	H	B	B	H	B	B	H	H	B	H	B	B	B	H	B	H	H	B
Squ20M	Sequ1071TUF	H	H	H	B	B	B	H	H	B	B	B	B	B	B	H	H	B	H	B	H	B	B	B	B	B	B	H	B	B	H	H	B	B	H	B	B	H	H	B	H	B	B	B	H	B	H	H	B
Squ20M	Sequ02382SNP	H	H	H	B	B	B	H	H	B	B	B	B	B	B	H	H	B	H	B	H	B	B	B	B	B	B	H	B	-	H	H	B	B	H	B	B	H	H	B	H	B	B	B	H	B	H	H	B
Squ21M	Sequ0406TUF	H	H	B	B	B	B	B	B	H	H	H	B	B	B	B	B	B	B	H	B	H	H	H	B	H	H	B	H	B	B	H	B	B	B	H	H	H	H	B	H	B	H	H	H	H	B	B	H
Squ21M	Sequ0800TUF	H	H	B	B	B	B	B	B	H	H	H	B	B	B	B	B	B	B	H	B	H	H	H	B	H	H	B	H	B	B	H	B	B	B	H	H	H	H	B	H	B	H	H	H	H	B	B	H
Squ21M	Sequ0763TUF	H	H	B	B	B	B	B	B	H	H	H	B	B	B	B	B	B	B	H	B	H	H	H	B	H	H	B	H	B	B	H	B	B	B	H	H	H	H	B	H	B	H	H	H	H	B	B	H
Squ21BM	Sequ0251TUF	H	H	B	H	B	B	B	B	B	H	B	H	B	H	H	B	B	B	B	B	B	H	H	B	H	B	H	B	B	B	B	H	B	B	H	B	B	B	B	H	B	B	B	B	H	B	H	B
Squ21BM	Sequ1230BAC	H	H	B	H	B	B	B	B	B	H	B	H	B	H	H	B	B	B	B	B	B	H	H	B	H	B	H	B	B	B	B	H	B	B	H	B	B	B	B	H	B	B	B	B	H	B	H	B
Squ21BM	Sequ0580TUF	H	H	B	H	B	B	B	B	B	H	B	H	B	H	H	B	B	B	B	B	B	H	H	B	H	B	H	B	H	B	B	H	B	B	H	B	B	B	B	H	B	B	B	B	H	B	H	B
Squ21BM	Sequ0607TUF	H	H	B	H	B	B	B	B	B	H	B	H	B	H	H	B	B	B	B	B	B	H	H	B	H	B	H	B	H	B	B	H	B	B	H	B	B	B	B	H	B	B	B	B	H	B	H	B
Squ21BM	Sequ0618TUF	H	H	B	H	B	B	B	B	B	H	B	H	B	H	H	B	B	B	B	B	B	H	H	B	H	B	H	B	H	B	B	H	B	B	H	B	B	B	B	H	B	B	B	B	H	B	H	B
Squ21BM	Sequ0715TUF	H	H	B	H	B	B	B	B	B	H	B	H	B	H	H	B	B	B	B	B	B	H	H	B	H	B	H	B	H	B	B	H	B	B	H	B	B	B	B	H	B	B	B	B	H	B	H	B
Squ21BM	Sequ0764TUF	H	H	B	H	B	B	B	B	B	H	B	H	B	H	H	B	B	B	B	B	B	H	H	B	H	B	H	B	H	B	B	H	B	B	H	B	B	B	B	H	B	B	B	B	H	B	H	B
Squ21BM	Sequ0953TUF	H	H	B	H	B	B	B	B	B	H	B	H	B	H	H	B	B	B	B	B	B	H	H	B	H	B	H	B	H	B	B	H	B	B	H	B	B	B	B	H	B	B	B	B	H	B	H	B
Squ21BM	Sequ0979TUF	H	H	B	H	B	B	B	B	B	H	B	H	B	H	H	B	B	B	B	B	B	H	H	B	H	B	H	B	H	B	B	H	B	B	H	B	B	B	B	H	B	B	B	B	H	B	H	B
Squ21BM	Sequ1031TUF	H	H	B	H	B	B	B	B	B	H	B	H	B	H	H	B	B	B	B	B	B	H	H	B	H	B	H	B	H	B	B	H	B	B	H	B	B	B	B	H	B	B	B	B	H	B	H	B
Squ21BM	Sequ0252BAC	H	H	B	H	B	B	B	B	B	H	B	H	B	H	H	B	B	B	B	B	B	H	H	B	H	B	H	B	H	B	B	H	B	B	H	B	B	B	B	H	B	B	B	B	H	B	H	B
Squ21BM	Sequ0597BAC	H	H	B	H	B	B	B	B	B	H	B	H	B	H	H	B	B	B	B	B	B	H	H	B	H	B	H	B	H	B	B	H	B	B	H	B	B	B	B	H	B	B	B	B	H	B	H	B
Squ21BM	Sequ0784BAC	H	H	B	H	B	B	B	B	B	H	B	H	B	H	H	B	B	B	B	B	B	H	H	B	H	B	H	B	H	B	B	H	B	B	H	B	B	B	B	H	B	B	B	B	H	B	H	B
Squ21BM	Sequ1264BAC	H	H	B	H	B	B	B	B	B	H	B	H	B	H	H	B	B	B	B	B	B	H	H	B	H	B	H	B	H	B	B	H	B	B	H	B	B	B	B	H	B	B	B	B	H	B	H	B
Squ21BM	Sequ1342BAC	H	H	B	H	B	B	B	B	B	H	B	H	B	H	H	B	B	B	B	B	B	H	H	B	H	B	H	B	H	B	B	H	B	B	H	B	B	B	B	H	B	B	B	B	H	B	H	B
Squ21BM	Sequ2314BAC	H	H	B	H	B	B	B	B	B	H	B	H	B	H	H	B	B	B	B	B	B	H	H	B	H	B	H	B	H	B	B	H	B	B	H	B	B	B	B	H	B	B	B	B	H	B	H	B
Squ21BM	Sequ2315BAC	H	H	B	H	B	B	B	B	B	H	B	H	B	H	H	B	B	B	B	B	B	H	H	B	H	B	H	B	H	B	B	H	B	B	H	B	B	B	B	H	B	B	B	B	H	B	H	B
Squ21BM	Sequ00711SNP	H	H	B	H	B	B	B	B	B	H	B	H	B	H	H	B	B	B	B	B	B	H	H	B	H	B	H	B	H	B	B	H	B	B	H	B	B	B	B	H	B	B	B	B	H	B	H	B
Squ21BM	Sequ01888SNP	H	H	B	H	B	B	B	B	B	H	B	H	B	H	H	B	B	B	B	B	B	H	H	B	H	B	H	B	H	B	B	H	B	B	H	B	B	B	B	H	B	B	B	B	H	B	H	B
Squ21BM	Sequ0519TUF	H	H	B	H	B	B	B	B	B	H	B	H	B	H	H	B	B	B	B	B	B	H	H	B	H	B	H	B	H	B	B	H	B	B	H	B	B	B	B	H	B	B	B	B	H	B	H	B
Squ21BM	Sequ0540TUF	H	H	B	H	B	B	B	B	B	H	B	H	B	H	H	B	B	B	B	B	B	H	H	B	H	B	H	B	H	B	B	H	B	B	H	B	B	B	B	H	B	B	B	B	H	B	H	B
Squ21BM	Sequ0657BAC	H	H	B	H	B	B	B	B	B	H	B	H	B	H	H	B	B	B	B	B	B	H	H	B	H	B	H	B	H	B	B	H	B	B	H	B	B	B	B	H	B	B	B	B	H	B	H	B
Squ21BM	Sequ1316BAC	H	H	B	H	B	B	B	B	B	H	B	H	B	H	H	B	B	B	B	B	B	H	H	B	H	B	H	B	H	B	B	H	B	B	H	B	B	B	B	H	B	B	B	B	H	B	H	B
Squ21BM	Sequ3313BAC	H	H	B	H	B	B	B	B	B	H	B	H	B	H	H	B	B	B	B	B	B	H	H	B	H	B	H	B	H	B	B	H	B	B	H	B	B	B	B	H	B	B	B	B	H	B	H	B
Squ21BM	Sequ3119BAC	H	H	B	H	B	B	B	B	B	H	B	H	B	H	H	B	B	B	B	B	B	H	H	B	H	B	H	B	H	B	B	H	B	B	H	B	B	B	B	H	B	B	B	B	H	B	H	B
Squ21BM	Sequ0940TUF	H	H	B	H	B	B	B	B	B	H	B	H	B	H	H	B	B	B	B	B	H	H	H	B	H	B	H	B	H	B	B	H	B	B	H	B	B	B	B	H	B	B	B	B	H	B	H	B
Squ22M	Sequ0192TUF	B	H	H	B	H	B	B	B	H	B	B	H	B	B	H	B	B	H	B	B	B	B	H	H	B	H	H	B	B	B	H	B	B	B	B	H	H	B	H	B	B	H	H	B	H	H	H	H
Squ22M	Sequ0551TUF	B	H	H	B	H	B	B	B	H	B	B	H	B	B	H	B	B	H	B	B	B	B	H	H	B	H	H	B	B	B	H	B	B	B	B	H	H	B	H	B	B	H	H	B	H	H	H	H
Squ22M	Sequ0555TUF	B	H	H	B	H	B	B	B	H	B	B	H	B	B	H	B	B	H	B	B	B	B	H	H	B	H	H	B	B	B	H	B	B	B	B	H	H	B	H	B	B	H	H	B	H	H	H	H
Squ22M	Sequ0650TUF	B	H	H	B	H	B	B	B	H	B	B	H	B	B	H	B	B	H	B	B	B	B	H	H	B	H	H	B	B	B	H	B	B	B	B	H	H	B	H	B	B	H	H	B	H	H	H	H
Squ22M	Sequ0662TUF	B	H	H	B	H	B	B	B	H	B	B	H	B	B	H	B	B	H	B	B	B	B	H	H	B	H	H	B	B	B	H	B	B	B	B	H	H	B	H	B	B	H	H	B	H	H	H	H
Squ22M	Sequ0663TUF	B	H	H	B	H	B	B	B	H	B	B	H	B	B	H	B	B	H	B	B	B	B	H	H	B	H	H	B	B	B	H	B	B	B	B	H	H	B	H	B	B	H	H	B	H	H	H	H
Squ22M	Sequ0809TUF	B	H	H	B	H	B	B	B	H	B	B	H	B	B	H	B	B	H	B	B	B	B	H	H	B	H	H	B	B	B	H	B	B	B	B	H	H	B	H	B	B	H	H	B	H	H	H	H
Squ22M	Sequ0826TUF	B	H	H	B	H	B	B	B	H	B	B	H	B	B	H	B	B	H	B	B	B	B	H	H	B	H	H	B	B	B	H	B	B	B	B	H	H	B	H	B	B	H	H	B	H	H	H	H
Squ22M	Sequ0917TUF	B	H	H	B	H	B	B	B	H	B	B	H	B	B	H	B	B	H	B	B	B	B	H	H	B	H	H	B	B	B	H	B	B	B	B	H	H	B	H	B	B	H	H	B	H	H	H	H
Squ22M	Sequ0294BAC	B	H	H	B	H	B	B	B	H	B	B	H	B	B	H	B	B	H	B	B	B	B	H	H	B	H	H	B	B	B	H	B	B	B	B	H	H	B	H	B	B	H	H	B	H	H	H	H
Squ22M	Sequ0324BAC	B	H	H	B	H	B	B	B	H	B	B	H	B	B	H	B	B	H	B	B	B	B	H	H	B	H	H	B	B	B	H	B	B	B	B	H	H	B	H	B	B	H	H	B	H	H	H	H
Squ22M	Sequ1972BAC	B	H	H	B	H	B	B	B	H	B	B	H	B	B	H	B	B	H	B	B	B	B	H	H	B	H	H	B	B	B	H	B	B	B	B	H	H	B	H	B	B	H	H	B	H	H	H	H
Squ22M	Sequ2059BAC	B	H	H	B	H	B	B	B	H	B	B	H	B	B	H	B	B	H	B	B	B	B	H	H	B	H	H	B	B	B	H	B	B	B	B	H	H	B	H	B	B	H	H	B	H	H	H	H
Squ22M	Sequ2979BAC	B	H	H	B	H	B	B	B	H	B	B	H	B	B	H	B	B	H	B	B	B	B	H	H	B	H	H	B	B	B	H	B	B	B	B	H	H	B	H	B	B	H	H	B	H	H	H	H
Squ22M	Sequ00915SNP	B	H	H	B	H	B	B	B	H	B	B	H	B	B	H	B	B	H	B	B	B	B	H	H	B	H	H	B	B	B	H	B	B	B	B	H	H	B	H	B	B	H	H	B	H	H	H	H
Squ22M	Sequ2050BAC	B	H	B	B	H	B	B	B	H	B	B	H	B	B	H	B	B	H	B	B	B	B	H	H	B	H	H	B	B	B	H	B	B	B	B	H	H	B	H	B	B	B	H	B	H	H	H	H
Squ22M	Sequ0977TUF	B	H	B	B	H	B	B	B	H	H	B	H	B	B	H	B	B	H	B	B	B	B	H	H	B	H	H	B	B	B	H	B	B	B	B	H	H	B	H	B	B	B	H	B	H	H	H	H
Squ22M	Sequ2616BAC	B	H	B	B	H	B	B	B	H	H	B	H	B	B	H	H	B	H	B	B	B	B	H	H	B	H	H	B	B	B	H	B	B	B	B	H	H	B	H	B	B	B	H	B	H	H	H	H
Squ22M	Sequ0981BAC	B	H	B	B	H	B	B	B	H	H	B	H	B	B	H	H	B	H	B	B	B	B	H	H	B	H	H	B	B	B	H	B	B	B	B	H	H	B	H	B	B	B	H	B	H	H	H	B
Squ22M	Sequ2391BAC	B	H	B	B	H	B	B	B	H	H	B	H	B	B	H	H	B	H	B	B	B	B	H	H	B	H	H	H	B	B	H	B	B	B	B	H	H	B	H	B	B	B	H	B	H	H	H	B
Squ22M	Sequ0476BAC	B	H	B	B	H	B	B	B	H	H	B	H	B	B	H	H	B	H	B	B	B	B	H	H	B	H	H	H	B	B	H	B	B	B	B	H	H	B	H	B	B	B	H	B	H	H	H	B
Squ22M	Sequ3186BAC	B	H	B	H	H	B	B	B	H	H	B	H	B	B	H	H	B	B	H	B	B	H	H	H	B	H	H	H	B	B	H	B	B	B	B	H	B	B	H	B	B	B	H	B	H	H	H	B
Squ22M	Sequ1311BAC	B	H	B	H	H	B	B	B	H	H	B	H	B	H	H	H	B	B	H	B	H	H	H	H	B	H	H	H	B	B	H	B	B	B	B	H	B	B	H	B	H	B	H	B	H	B	H	B
Squ22M	Sequ03570SNP	B	H	B	H	H	H	B	B	H	H	H	H	B	H	H	H	B	B	H	H	H	H	H	H	H	H	H	H	B	B	H	B	B	B	H	H	B	B	H	B	H	B	B	B	H	B	H	B
Squ22M	Sequ0137TUF	H	H	B	H	H	H	B	B	H	H	H	H	H	H	B	H	B	B	H	H	H	H	H	H	H	B	H	H	B	B	H	B	B	B	H	H	B	H	H	H	H	B	B	B	H	B	H	B
Squ22M	Sequ0733TUF	H	H	B	H	H	H	B	B	H	H	H	H	H	H	B	H	B	B	H	H	H	H	H	H	H	B	H	H	B	B	H	B	B	B	H	H	B	H	H	H	H	B	B	B	H	B	H	B
Squ22M	Sequ0734TUF	H	H	B	H	H	H	B	B	H	H	H	H	H	H	B	H	B	B	H	H	H	H	H	H	H	B	H	H	B	B	H	B	B	B	H	H	B	H	H	H	H	B	B	B	H	B	H	B
Squ23M	Sequ0522TUF	H	B	H	B	B	B	B	B	H	B	H	H	H	H	B	H	B	B	H	B	B	B	H	H	B	B	H	B	B	H	H	H	B	B	B	B	B	B	B	B	H	H	H	B	B	H	H	B
Squ23M	Sequ0987BAC	H	B	H	B	B	B	B	B	H	B	H	H	H	H	B	H	B	B	H	B	B	B	H	H	B	B	H	B	B	H	H	H	B	B	B	B	B	B	B	B	H	H	H	B	B	H	H	B
Squ23M	Sequ0641TUF	H	B	H	B	B	B	B	B	H	B	H	H	H	H	B	H	B	B	H	B	B	B	H	H	B	B	H	B	B	H	H	H	B	B	B	B	B	B	B	B	H	H	H	B	B	H	H	B
Squ23M	Sequ0414BAC	H	B	H	B	B	B	B	H	H	B	B	H	H	H	B	H	B	B	H	B	B	B	H	B	B	B	H	B	B	H	H	H	B	B	B	B	B	B	B	B	H	H	H	B	B	H	H	B
Squ23M	Sequ1023TUF	H	B	H	B	B	B	B	H	H	B	B	H	B	H	B	H	B	B	H	B	B	B	B	B	B	B	H	B	B	H	H	H	B	B	B	H	B	B	B	B	H	H	H	H	B	H	H	B
Squ23M	Sequ1777BAC	H	B	H	B	B	B	B	H	H	B	B	H	B	H	B	H	B	B	H	B	B	B	B	B	B	B	H	B	B	H	H	H	B	B	B	H	B	B	B	B	H	H	H	H	B	H	H	B
Squ23M	Sequ2613BAC	B	B	H	B	B	H	B	H	H	B	B	H	B	H	B	H	H	B	H	B	H	B	B	B	B	B	H	B	B	H	H	B	B	B	B	H	B	B	B	B	H	H	H	H	B	H	H	B
Squ23M	Sequ04554SNP	B	B	H	B	B	H	B	H	H	B	B	H	B	H	B	H	H	B	H	B	H	B	B	B	B	B	H	B	B	H	H	B	B	B	B	H	B	B	B	B	H	H	H	H	B	H	H	B
Squ23M	Sequ0703TUF	B	B	H	B	B	H	B	H	H	B	B	H	B	H	B	H	H	B	H	B	H	B	B	B	B	B	H	B	B	H	H	B	B	B	H	H	B	B	B	B	H	H	H	H	B	H	H	B
Squ23M	Sequ2859BAC	B	B	H	B	B	H	B	H	H	B	B	H	B	H	B	H	H	B	H	B	H	B	B	B	B	B	H	B	B	H	H	B	B	B	H	H	B	B	B	B	H	H	H	H	B	H	H	B
Squ23M	Sequ0199TUF	B	B	H	H	B	H	B	H	H	B	B	H	B	H	B	H	H	B	H	B	H	B	B	B	B	B	H	B	B	H	H	B	B	B	H	H	B	B	B	B	H	H	H	H	B	H	H	B
Squ23M	Sequ03648SNP	B	B	H	-	B	H	-	H	H	B	B	H	B	H	B	H	H	B	H	B	H	B	B	B	B	B	H	B	B	H	H	B	B	B	H	H	B	B	B	B	H	H	H	H	B	H	-	B
Squ23M	Sequ0123TUF	B	B	H	H	B	H	H	H	H	B	B	H	B	H	B	H	H	B	H	H	H	B	B	B	B	B	B	B	B	H	H	B	B	B	H	H	B	B	B	B	H	B	H	H	B	H	H	B
Squ23M	Sequ0411TUF	B	B	H	H	B	H	H	H	H	B	B	H	B	H	B	H	H	B	H	H	H	B	B	B	B	B	B	B	B	H	H	B	B	B	H	H	B	B	B	B	H	B	H	H	B	H	H	B
Squ23M	Sequ0440TUF	B	B	H	H	B	H	H	H	H	B	B	H	B	H	B	H	H	B	H	H	H	B	B	B	B	B	B	B	B	H	H	B	B	B	H	H	B	B	B	B	H	B	H	H	B	H	H	B
Squ23M	Sequ0704TUF	B	B	H	H	B	H	H	H	H	B	B	H	B	H	B	H	H	B	H	H	H	B	B	B	B	B	B	B	B	H	H	B	B	B	H	H	B	B	B	B	H	B	H	H	B	H	H	B
Squ23M	Sequ0635TUF	B	B	H	H	B	H	H	H	H	B	B	H	B	H	H	H	H	B	H	H	H	B	B	B	B	B	B	B	B	H	H	B	B	B	H	H	B	B	B	B	H	B	H	H	B	H	H	B
Squ23M	Sequ0770TUF	B	B	H	H	B	H	H	H	H	B	B	H	B	H	H	H	H	B	H	H	H	B	B	B	B	B	B	B	B	H	H	B	B	B	H	H	B	B	B	B	H	B	H	H	B	H	H	B
Squ23M	Sequ0773TUF	B	B	H	H	B	H	H	H	H	B	B	H	B	H	H	H	H	B	H	H	H	B	B	B	B	B	B	B	B	H	H	B	B	B	H	H	B	B	B	B	H	B	H	H	B	H	H	B
Squ23M	Sequ0963TUF	B	B	H	H	B	H	H	H	H	B	B	H	B	H	H	H	H	B	H	H	H	B	B	B	B	B	B	B	B	H	H	B	B	B	H	H	B	B	B	B	H	B	H	H	B	H	H	B
Squ23M	Sequ0965TUF	B	B	H	H	B	H	H	H	H	B	B	H	B	H	H	H	H	B	H	H	H	B	B	B	B	B	B	B	B	H	H	B	B	B	H	H	B	B	B	B	H	B	H	H	B	H	H	B
Squ23M	Sequ0976TUF	B	B	H	H	B	H	H	H	H	B	B	H	B	H	H	H	H	B	H	H	H	B	B	B	B	B	B	B	B	H	H	B	B	B	H	H	B	B	B	B	H	B	H	H	B	H	H	B
Squ23M	Sequ0982TUF	B	B	H	H	B	H	H	H	H	B	B	H	B	H	H	H	H	B	H	H	H	B	B	B	B	B	B	B	B	H	H	B	B	B	H	H	B	B	B	B	H	B	H	H	B	H	H	B
Squ23M	Sequ1027TUF	B	B	H	H	B	H	H	H	H	B	B	H	B	H	H	H	H	B	H	H	H	B	B	B	B	B	B	B	B	H	H	B	B	B	H	H	B	B	B	B	H	B	H	H	B	H	H	B
Squ23M	Sequ0010BAC	B	B	H	H	B	H	H	H	H	B	B	H	B	H	H	H	H	B	H	H	H	B	B	B	B	B	B	B	B	H	H	B	B	B	H	H	B	B	B	B	H	B	H	H	B	H	H	B
Squ23M	Sequ0619BAC	B	B	H	H	B	H	H	H	H	B	B	H	B	H	H	H	H	B	H	H	H	B	B	B	B	B	B	B	B	H	H	B	B	B	H	H	B	B	B	B	H	B	H	H	B	H	H	B
Squ23M	Sequ1561BAC	B	B	H	H	B	H	H	H	H	B	B	H	B	H	H	H	H	B	H	H	H	B	B	B	B	B	B	B	B	H	H	B	B	B	H	H	B	B	B	B	H	B	H	H	B	H	H	B
Squ23M	Sequ1766BAC	B	B	H	H	B	H	H	H	H	B	B	H	B	H	H	H	H	B	H	H	H	B	B	B	B	B	B	B	B	H	H	B	B	B	H	H	B	B	B	B	H	B	H	H	B	H	H	B
Squ23M	Sequ3191BAC	B	B	H	H	B	H	H	H	H	B	B	H	B	H	H	H	H	B	H	H	H	B	B	B	B	B	B	B	B	H	H	B	B	B	H	H	B	B	B	B	H	B	H	H	B	H	H	B
Squ23M	Sequ00721SNP	B	B	H	H	B	H	H	H	H	B	B	H	B	H	H	H	H	B	H	H	H	B	B	B	B	B	B	B	B	H	H	B	B	B	H	H	B	B	B	B	H	B	H	H	B	H	H	B
Squ23M	Sequ03369SNP	B	B	H	H	B	H	H	H	H	B	B	H	B	H	H	H	H	B	H	H	H	B	B	B	B	B	B	B	B	H	H	B	B	B	H	H	B	B	B	B	H	B	H	H	B	H	H	B
Squ24M	Sequ0058TUF	H	H	H	H	B	B	B	B	H	H	B	B	H	H	B	B	H	H	H	B	H	H	H	B	B	H	B	H	H	H	B	H	B	H	H	B	B	H	B	B	B	B	H	B	B	B	B	H
Squ24M	Sequ0578TUF	H	H	H	H	B	B	B	B	H	H	B	B	H	H	B	B	H	H	H	B	H	H	H	B	B	H	B	H	H	H	B	H	B	H	H	B	B	H	B	B	B	B	H	B	B	B	B	H
Squ24M	Sequ0585TUF	H	H	H	H	B	B	B	B	H	H	B	B	H	H	B	B	H	H	H	B	H	H	H	B	B	H	B	H	H	H	B	H	B	H	H	B	B	H	B	B	B	B	H	B	B	B	B	H
Squ24M	Sequ0600TUF	H	H	H	H	B	B	B	B	H	H	B	B	H	H	B	B	H	H	H	B	H	H	H	B	B	H	B	H	H	H	B	H	B	H	H	B	B	H	B	B	B	B	H	B	B	B	B	H
Squ24M	Sequ0961TUF	H	H	H	H	B	B	B	B	H	H	B	B	H	H	B	B	H	H	H	B	H	H	H	B	B	H	B	H	H	H	B	H	B	H	H	B	B	H	B	B	B	B	H	B	B	B	B	H
Squ24M	Sequ0455BAC	H	H	H	H	B	B	B	B	H	H	B	B	H	H	B	B	H	H	H	B	H	H	H	B	B	H	B	H	H	H	B	H	B	H	H	B	B	H	B	B	B	B	H	B	B	B	B	H
Squ24M	Sequ01781SNP	H	H	H	H	B	B	B	B	H	H	B	B	H	H	B	B	H	H	H	B	H	H	H	B	B	H	B	H	H	H	B	H	B	H	H	B	B	H	B	B	B	B	H	B	B	B	B	H
Squ24M	Sequ1050TUF	H	H	H	H	B	B	B	B	H	H	B	B	H	H	B	B	H	H	H	B	H	H	H	B	B	H	B	H	H	H	B	H	B	B	H	B	B	H	B	B	B	B	H	B	B	B	B	H
Squ24M	Sequ1688BAC	H	H	H	H	B	B	B	B	H	H	B	B	H	H	B	B	H	H	H	B	H	H	H	B	B	H	B	H	H	H	B	H	B	B	H	B	B	H	B	B	B	B	H	B	B	B	B	H
Squ24M	Sequ2123BAC	H	H	H	H	B	B	B	B	H	H	B	B	H	H	B	B	H	H	H	B	H	H	H	B	B	H	B	H	H	H	B	H	B	B	H	B	B	H	B	B	B	B	H	B	B	B	B	H
Squ24M	Sequ1107BAC	H	H	H	H	B	B	B	B	H	H	B	B	H	H	B	B	H	H	H	B	H	H	H	B	B	H	B	H	H	H	B	H	B	B	H	B	B	H	B	H	B	B	H	B	B	B	B	H
Squ24M	Sequ2827BAC	H	H	H	H	B	B	B	B	H	H	B	B	H	H	B	B	H	H	H	B	H	H	H	B	B	H	B	H	H	H	B	H	B	B	H	B	B	H	B	H	B	B	H	B	B	B	B	H
Squ24M	Sequ2877BAC	H	H	H	H	B	B	B	B	H	H	B	B	H	H	B	B	H	H	H	B	H	H	H	B	B	H	B	H	H	H	B	H	B	B	H	B	B	H	B	H	B	B	H	B	B	B	B	H
Squ24M	Sequ0713TUF	H	H	H	H	B	B	B	B	H	H	B	B	H	H	B	B	H	H	H	B	H	H	H	B	B	H	B	H	H	H	B	H	B	B	H	B	B	H	B	H	H	B	H	B	B	B	B	H
Squ24M	Sequ0726TUF	H	H	H	H	B	B	B	B	H	H	B	B	H	H	B	B	H	H	H	B	H	H	H	B	B	H	B	H	H	H	B	H	B	B	H	B	B	H	B	H	H	B	H	B	B	B	B	H
Squ24M	Sequ0912TUF	H	H	H	H	B	B	B	B	H	H	B	B	H	H	B	B	H	H	H	B	H	H	H	B	B	H	B	H	H	H	B	H	B	B	H	B	B	H	B	H	H	B	H	B	B	B	B	H
Squ24M	Sequ1124BAC	H	H	H	H	B	B	B	B	H	H	B	B	H	H	B	B	H	H	H	B	H	H	H	B	B	H	B	H	H	H	B	H	B	B	H	B	B	H	B	H	H	B	H	B	B	B	B	H
Squ24M	Sequ2313BAC	H	H	H	H	B	B	B	B	H	H	B	B	H	H	B	B	H	H	H	B	H	H	H	B	B	H	B	H	H	H	B	H	B	B	H	B	B	H	B	H	H	B	H	B	B	B	B	H
Squ24M	Sequ0525TUF	H	H	H	H	B	B	B	B	H	H	B	B	H	H	B	B	H	H	H	B	H	H	H	B	B	H	B	H	H	H	B	H	B	B	H	B	B	H	B	H	H	B	H	B	B	B	B	H
Squ24M	Sequ0556TUF	H	H	H	H	B	B	B	B	H	H	B	B	H	H	B	B	H	H	H	B	H	H	H	B	B	H	B	B	H	H	B	H	B	B	H	B	B	H	B	H	H	B	H	B	B	B	B	H
Squ24M	Sequ0846TUF	H	H	H	H	B	B	B	B	H	H	B	B	H	H	B	B	H	H	H	B	H	H	H	B	B	H	B	B	H	H	B	H	B	B	H	B	B	H	B	H	H	B	H	B	B	B	B	H
Squ24M	Sequ1003TUF	H	H	H	H	B	B	B	B	H	H	B	B	H	H	B	B	H	H	H	B	H	H	H	B	B	H	B	B	H	H	B	H	B	B	H	B	B	H	B	H	H	B	H	B	B	B	B	H
Squ24M	Sequ1218BAC	H	H	H	H	B	B	B	B	H	H	B	B	H	H	B	B	H	H	H	B	H	H	H	B	B	H	B	B	H	H	B	H	B	B	H	B	B	H	B	H	H	B	H	B	B	B	B	H
Squ24M	Sequ0041TUF	H	H	H	H	B	B	B	B	H	H	B	B	H	H	B	B	H	H	H	B	H	H	H	B	B	H	B	B	H	H	B	H	B	B	H	B	B	H	B	H	H	B	H	B	B	B	B	H
Squ24M	Sequ0164TUF	H	H	H	H	B	B	B	B	H	H	B	B	H	H	B	B	H	H	H	B	H	H	H	B	B	H	B	B	H	H	B	H	B	B	H	B	B	H	B	H	H	B	H	B	B	B	B	H
Squ24M	Sequ2568BAC	H	H	H	H	B	B	B	B	H	H	B	B	H	H	B	B	H	H	H	B	H	H	H	B	B	H	B	B	H	B	B	H	B	B	H	B	B	H	B	H	H	B	H	B	B	B	B	H
Squ24M	Sequ0171TUF	H	H	H	H	B	B	B	B	H	B	B	B	H	H	B	B	H	H	H	B	H	H	H	B	B	H	B	B	H	B	B	H	B	B	H	B	B	H	B	H	H	B	H	B	B	B	B	H
Squ24M	Sequ1329BAC	H	H	H	H	B	B	B	B	H	B	B	B	H	H	B	B	H	H	B	B	H	H	H	B	B	H	B	B	H	B	B	H	B	B	H	B	B	H	B	H	H	B	H	B	B	B	B	H
Squ24M	Sequ2618BAC	H	H	H	H	B	B	B	B	H	B	B	B	H	H	B	B	H	H	B	B	H	H	H	B	B	H	B	B	H	B	B	H	B	B	H	B	B	H	B	H	H	B	H	B	B	B	B	H
Squ24M	Sequ2712BAC	H	H	H	H	B	B	B	B	H	B	B	B	H	H	B	B	H	H	B	B	H	H	H	B	B	H	B	B	H	B	B	H	B	B	H	B	B	H	B	H	H	B	H	B	B	B	B	H
Squ24BM	Sequ0613TUF	B	B	B	B	H	H	H	H	B	B	B	H	B	H	H	B	H	H	B	H	B	B	H	H	B	H	B	B	H	B	H	H	B	H	B	B	B	H	B	H	H	H	H	B	B	B	B	H
Squ24BM	Sequ0258TUF	B	B	B	B	H	H	H	H	B	B	B	H	B	H	H	B	H	H	B	H	B	B	H	H	B	H	B	B	H	B	H	H	B	H	B	B	B	H	B	H	H	H	H	B	B	B	B	H
Squ24BM	Sequ0646TUF	H	B	B	B	H	H	H	H	B	B	B	H	B	H	H	B	H	H	B	H	B	B	H	H	B	H	B	B	H	B	H	H	B	H	B	B	B	H	B	H	H	H	H	B	B	B	B	H
Squ24BM	Sequ2670BAC	H	B	B	B	H	B	H	H	B	B	B	H	B	H	H	B	H	H	B	H	H	B	H	H	B	H	B	B	H	B	H	H	B	H	B	B	B	H	B	H	H	H	H	B	B	B	B	H
Squ24BM	Sequ04738SNP	H	B	B	B	H	B	H	H	B	B	B	H	B	H	H	B	H	H	B	H	H	B	H	H	B	H	B	B	H	B	H	H	B	H	B	B	B	H	B	H	H	H	H	B	B	B	B	H
[truncated: 42 more columns]

## Sheet: family B female geno
Family B female genotype		progeny
linkage group	marker name	1	2	3	4	5	6	7	8	9	10	11	12	13	14	15	16	17	18	19	20	21	22	23	24	25	26	27	28	29	30	31	32	33	34	35	36	37	38	39	40	41	42	43	44	45	46	47	48
Squ2F	Sequ0046BAC	A	H	H	A	H	A	A	A	H	A	A	A	A	A	A	A	A	A	H	A	A	A	A	H	H	A	A	A	H	H	A	A	H	A	A	A	A	H	H	A	H	A	H	A	H	H	H	H
Squ2F	Sequ1771BAC	A	H	H	A	H	A	A	A	H	A	A	A	A	A	A	A	A	A	H	A	A	A	A	H	H	A	A	A	H	H	A	A	H	A	A	A	A	H	H	A	H	A	H	A	H	H	H	H
Squ2F	Sequ1797BAC	A	H	H	A	H	A	A	A	H	A	A	A	A	A	A	A	A	A	H	A	A	A	A	H	H	A	A	A	H	H	A	A	H	A	A	A	A	H	H	A	H	A	H	A	H	H	H	H
Squ2F	Sequ0232TUF	A	H	H	A	H	A	A	A	H	A	A	A	A	A	A	A	A	A	H	A	A	A	A	H	H	A	A	A	H	H	A	A	H	A	A	A	A	H	H	A	H	A	H	A	H	H	H	H
Squ2F	Sequ2698BAC	A	H	H	A	H	A	A	A	H	A	A	A	A	A	A	A	A	A	H	A	A	A	A	H	H	A	A	A	H	H	A	A	H	A	A	A	A	H	H	A	H	A	H	A	H	H	H	H
Squ2F	Sequ1334BAC	A	H	H	A	H	A	A	A	H	A	A	A	A	A	A	A	A	A	H	A	A	A	A	H	H	A	A	A	H	H	A	A	H	A	A	A	A	H	H	A	H	A	H	A	H	H	H	H
Squ2F	Sequ0688BAC	A	H	H	A	H	A	A	A	H	A	A	A	A	A	A	A	A	A	H	A	A	A	A	H	H	A	A	A	H	H	A	A	H	A	A	H	A	H	H	A	H	A	H	A	H	H	H	H
Squ2F	Sequ2080BAC	A	H	H	A	H	A	A	A	H	A	A	A	A	A	A	A	A	A	H	A	A	A	A	H	H	A	A	H	H	H	A	A	H	A	A	H	A	H	H	A	H	A	H	A	H	H	H	H
Squ2F	Sequ1665BAC	A	H	H	A	H	A	A	A	H	A	A	A	A	A	A	A	A	A	H	A	A	A	A	H	H	A	A	H	H	H	A	A	H	A	A	H	A	H	H	A	H	A	H	A	H	H	H	H
Squ2F	Sequ0941TUF	A	H	H	A	H	A	A	A	H	A	A	A	A	A	A	A	A	A	H	A	A	A	A	H	H	A	A	H	H	H	A	A	H	A	A	H	A	H	H	A	H	A	H	A	H	H	H	H
Squ2F	Sequ0056BAC	A	H	H	A	H	A	A	A	H	A	A	A	A	A	A	A	A	A	H	A	A	A	A	H	H	A	A	H	H	H	A	A	H	A	A	H	A	H	H	A	H	A	H	A	H	H	H	H
Squ2F	Sequ0889TUF	A	H	H	A	H	A	A	A	H	A	A	A	A	A	A	A	A	A	H	A	A	A	A	H	H	A	A	H	H	H	A	A	H	A	A	H	A	H	H	A	H	A	H	A	H	H	H	H
Squ2F	Sequ0020TUF	A	H	H	A	H	A	A	A	H	A	A	A	A	A	A	A	A	A	H	A	A	A	A	H	H	A	A	H	H	H	A	A	H	A	A	H	A	H	H	A	H	A	H	A	H	H	H	H
Squ2F	Sequ2216BAC	A	H	H	A	H	A	A	A	H	A	A	A	A	A	A	A	A	A	H	A	A	A	A	H	H	A	A	H	H	H	A	A	H	A	A	H	A	H	H	A	H	A	H	A	H	H	H	H
Squ2F	Sequ0247TUF	A	H	H	A	H	A	A	A	H	A	A	A	H	A	A	A	A	A	H	A	A	A	A	H	H	A	A	H	H	H	A	A	H	A	A	H	A	H	H	A	H	A	H	A	H	H	H	H
Squ2F	Sequ0603TUF	A	H	H	A	H	A	A	A	H	A	A	A	H	A	A	A	A	A	H	A	A	A	A	H	H	A	A	H	H	H	A	A	H	A	A	H	A	H	H	A	H	A	H	A	H	H	H	H
Squ2F	Sequ0225TUF	A	H	H	A	H	A	A	A	H	A	A	A	H	A	A	A	A	A	H	A	A	A	A	H	H	A	A	H	H	H	A	A	H	A	A	H	A	H	H	A	H	A	H	A	H	H	H	H
Squ2F	Sequ0832TUF	A	H	H	A	H	A	A	A	H	A	A	A	H	A	A	A	A	A	H	A	A	A	A	H	H	A	A	H	H	-	A	A	H	A	A	H	A	H	H	A	H	A	H	A	H	H	H	H
Squ2F	Sequ1776BAC	A	H	H	A	H	A	A	A	H	A	A	A	H	A	A	A	A	A	H	A	A	A	A	H	H	A	A	H	H	H	A	A	H	A	A	H	A	H	H	A	H	A	H	A	H	H	H	H
Squ2F	Sequ0198TUF	A	H	H	A	H	A	A	A	H	A	A	A	H	A	A	A	A	A	H	A	A	A	A	H	H	A	A	H	H	H	A	A	H	A	A	H	A	H	H	A	H	A	H	A	H	H	H	H
Squ2F	Sequ0509BAC	A	H	H	A	H	A	A	A	H	A	A	A	H	A	A	A	A	A	H	A	A	A	A	H	H	A	A	H	H	H	A	A	H	A	A	H	A	H	H	A	H	A	H	A	H	H	H	H
Squ2F	Sequ0785TUF	A	H	H	A	H	A	A	A	H	A	A	A	H	A	A	A	A	A	H	A	A	A	A	H	H	A	A	H	H	H	A	A	H	A	A	H	A	H	H	A	H	A	H	A	H	H	H	H
Squ2F	Sequ648TUF	A	H	H	A	H	A	A	A	H	A	A	A	H	A	A	A	A	A	H	A	A	A	A	H	H	A	A	H	H	H	A	A	H	A	A	H	A	H	H	A	H	A	H	A	H	H	H	H
Squ2F	Sequ3121BAC	A	H	H	A	H	A	A	A	H	A	A	A	H	A	A	A	A	A	H	A	A	A	A	H	H	A	A	H	H	H	A	A	H	A	A	H	A	H	H	A	H	A	H	A	H	H	H	H
Squ2F	Sequ0171BAC	H	H	H	A	H	A	A	A	H	A	H	A	H	A	A	H	H	H	H	A	A	H	H	H	H	A	A	H	H	H	A	A	H	A	A	H	A	H	A	A	H	H	A	A	H	H	H	H
Squ2F	Sequ0172TUF	H	H	H	A	H	A	A	A	H	A	H	A	H	A	A	H	H	H	H	A	A	H	H	H	H	A	A	H	H	H	A	A	H	A	A	H	A	H	A	A	H	H	A	A	H	H	H	H
Squ2F	Seuq0672TUF	H	H	H	A	H	A	A	A	H	A	H	A	H	A	A	H	H	H	H	A	A	H	H	H	H	A	A	H	H	H	A	A	H	A	A	H	A	H	A	A	H	H	A	A	H	H	H	H
Squ2F	Sequ0125TUF	H	H	H	A	H	A	A	A	H	A	H	A	H	A	A	H	H	H	H	A	A	H	H	H	H	A	A	H	H	H	A	A	H	A	A	H	A	H	A	A	H	H	A	A	H	H	H	H
Squ2F	Sequ0979BAC	H	H	H	A	H	A	A	A	A	A	H	A	H	A	H	H	H	H	H	A	A	H	H	A	H	A	A	H	H	H	A	A	H	A	A	H	A	H	A	A	H	H	A	A	H	H	H	H
Squ2F	Sequ0788TUF	H	H	H	A	H	A	A	A	A	A	H	A	H	A	H	H	H	H	H	A	H	H	H	A	H	A	A	H	H	H	A	H	H	H	A	H	A	A	A	H	H	H	A	H	A	A	A	H
Squ2F	Sequ0549TUF	H	H	H	A	H	A	A	A	A	A	H	A	H	A	H	H	H	H	H	A	H	H	H	A	H	A	A	H	H	H	A	H	A	H	A	H	A	A	A	H	H	H	A	H	A	A	A	H
Squ2F	Sequ1026TUF	H	H	H	A	H	A	A	A	A	A	H	A	H	A	H	H	H	H	H	A	H	H	H	A	H	A	A	H	H	H	A	H	A	H	A	H	A	A	A	H	H	H	A	H	A	A	A	H
Squ2F	Sequ828TUF	H	H	H	A	H	A	A	A	A	A	H	H	H	A	H	H	H	H	H	A	H	H	H	A	H	A	A	H	H	H	A	H	A	H	A	H	A	A	A	H	H	H	A	H	A	A	A	A
Squ2F	Sequ827TUF	H	H	H	A	H	A	A	A	A	A	H	H	H	A	H	H	H	H	H	A	H	H	H	A	H	A	A	H	H	H	A	H	A	H	A	H	A	A	A	H	H	H	A	H	A	A	A	A
Squ8F	Sequ0074TUF	H	H	A	H	H	H	A	H	A	A	H	H	A	A	H	H	A	A	A	H	A	H	H	A	H	A	A	H	H	A	A	A	H	H	A	A	H	H	A	H	H	H	H	H	A	H	A	H
Squ8F	Sequ0409TUF	H	H	A	H	H	H	A	H	A	A	H	H	A	A	H	H	A	A	A	H	A	H	H	A	H	A	A	H	H	A	A	A	H	H	A	A	H	H	A	H	H	H	H	H	A	H	A	H
Squ8F	Sequ0906TUF	H	H	A	H	H	H	A	H	A	A	H	H	A	A	H	H	A	A	A	H	A	H	H	A	H	A	A	H	H	A	A	A	H	H	A	A	H	H	A	H	H	H	H	H	A	H	A	H
Squ8F	Sequ0431TUF	H	H	A	H	H	H	A	H	A	A	H	H	A	A	H	H	A	A	A	H	A	H	H	A	H	A	A	H	H	A	A	A	H	H	A	A	H	H	A	H	H	H	H	H	A	H	A	H
Squ8F	Sequ0160TUF	H	H	A	H	H	H	A	H	A	A	H	H	A	A	H	H	A	A	A	H	A	H	H	A	H	A	A	H	H	A	A	A	H	H	A	A	H	H	A	H	H	H	H	H	A	H	A	H
Squ8F	Sequ3175BAC	H	H	A	H	H	H	A	H	A	A	H	H	A	A	H	H	A	A	A	H	A	H	H	A	H	A	A	H	H	A	A	A	H	H	A	A	H	H	A	H	H	H	H	H	A	H	A	H
Squ8F	Sequ2078BAC	A	H	A	H	H	H	A	H	A	A	H	H	A	A	H	H	A	A	A	H	A	H	H	A	H	A	A	H	H	H	A	A	H	H	A	A	H	H	A	H	H	H	H	H	A	H	A	H
Squ8F	Sequ0670BAC	A	A	A	H	H	H	A	H	A	A	H	H	A	A	H	H	A	A	H	H	A	H	H	A	H	H	A	H	H	H	A	A	H	H	A	A	H	H	A	H	H	H	H	H	A	H	H	H
Squ8F	Sequ2198BAC	A	A	A	H	H	H	A	H	A	A	H	H	A	A	H	H	A	A	H	H	A	H	H	A	H	H	A	H	H	H	A	A	H	H	A	A	H	H	A	H	H	H	H	H	A	H	H	H
Squ8F	Sequ0873TUF	A	A	A	H	H	H	A	H	A	A	H	H	A	A	H	H	A	A	H	H	A	H	H	A	H	H	A	H	H	H	A	A	H	H	A	A	H	H	A	H	H	H	H	H	A	H	H	H
Squ8F	Sequ0610TUF	A	A	A	H	H	H	A	H	A	A	H	H	A	A	H	H	A	A	H	H	A	H	H	A	H	H	A	H	H	H	A	A	H	H	A	A	H	H	A	H	H	H	H	H	A	H	H	H
Squ8F	Sequ0503TUF	A	A	A	H	H	H	A	H	A	A	H	H	A	A	H	H	A	A	H	H	A	H	H	A	H	H	A	H	H	H	A	A	H	H	A	A	H	H	A	H	H	H	H	H	A	H	H	H
Squ8F	Sequ0101TUF	A	A	A	H	H	H	A	H	A	A	H	H	A	A	H	H	A	A	H	H	A	H	H	A	H	H	A	H	H	H	A	A	H	H	A	A	H	H	A	H	H	H	H	H	A	H	H	H
Squ8F	Sequ0507BAC	A	A	A	H	A	H	A	H	A	A	H	H	A	A	H	H	A	A	H	H	A	H	H	A	H	H	A	H	H	H	A	A	H	H	A	A	H	H	A	H	H	H	H	H	A	H	H	H
Squ8F	Sequ0575BAC	A	A	A	H	A	H	A	H	A	A	H	H	A	A	H	H	A	A	H	H	A	H	H	A	H	H	A	H	H	H	A	A	H	H	A	A	H	H	A	H	H	H	H	H	A	H	H	H
Squ8F	Sequ2218BAC	A	A	A	H	A	H	A	H	A	A	H	H	H	A	H	H	A	A	H	H	A	H	H	A	H	H	A	H	H	H	A	A	H	H	A	A	H	H	A	H	H	H	H	H	A	H	H	H
Squ8F	Sequ1013TUF	A	A	A	H	A	H	A	H	A	A	H	H	H	A	H	H	A	A	H	H	A	H	H	A	H	H	A	H	H	H	A	A	H	A	A	H	H	H	A	H	H	H	H	H	A	H	H	H
Squ8F	Sequ1039TUF	A	A	A	H	A	H	A	H	A	A	H	H	H	A	H	H	A	A	H	H	A	H	H	A	H	H	A	H	H	H	A	A	H	A	A	H	H	H	A	H	H	H	H	H	A	H	H	H
Squ20F	Sequ1100BAC	A	H	A	A	A	A	H	A	H	H	A	A	A	A	H	H	A	H	A	A	H	H	A	A	H	H	H	A	H	A	H	A	H	A	A	A	A	A	H	A	H	H	H	A	H	A	H	H
Squ20F	Sequ0439TUF	A	H	A	A	A	A	H	A	H	H	A	A	A	A	H	H	A	H	A	A	H	H	A	A	H	H	H	A	H	A	H	A	H	A	A	A	A	A	H	A	H	H	H	A	H	A	H	H
Squ20F	Sequ3071BAC	A	H	A	A	A	A	H	A	H	H	A	A	A	A	H	H	A	H	A	A	H	H	A	A	H	H	H	A	H	A	H	A	H	A	A	A	A	A	H	A	H	H	H	A	H	A	H	H
Squ20F	Sequ0938TUF	A	H	A	A	A	A	H	A	H	H	A	A	A	A	H	H	A	H	A	A	H	H	A	A	H	H	H	A	H	A	H	A	H	A	A	A	A	A	H	A	H	H	H	A	H	A	H	H
Squ20F	Sequ2569BAC	A	H	A	A	A	A	H	A	H	H	A	A	A	A	H	H	A	H	A	A	H	H	A	A	H	H	H	A	H	A	H	A	H	A	A	A	A	A	H	A	H	H	H	A	H	A	H	H
Squ20F	Sequ2645BAC	A	H	A	A	A	A	H	A	H	H	A	A	A	A	H	H	A	H	A	A	H	H	A	A	H	H	H	A	H	A	H	A	H	A	A	A	A	A	H	A	H	H	H	A	H	A	H	H
Squ20F	Sequ2312BAC	A	H	A	A	A	A	H	A	H	H	A	A	A	A	H	H	A	H	A	A	H	H	A	H	H	H	H	A	H	A	H	A	H	A	A	A	A	A	H	A	H	H	H	A	H	A	H	H
Squ20F	Sequ0537TUF	A	H	A	A	A	A	H	A	H	H	A	A	A	A	H	H	A	H	A	A	H	H	A	H	H	H	H	A	H	A	H	A	H	A	A	A	A	A	H	A	H	H	H	A	H	A	H	H
Squ20F	Sequ0596BAC	A	H	A	A	A	A	H	A	H	H	A	A	A	A	H	H	A	H	A	A	H	H	A	H	H	H	H	A	H	A	H	A	H	A	A	A	A	A	H	A	H	H	H	A	H	A	H	H
Squ20F	Seuq0829TUF	A	H	A	A	A	A	H	A	H	H	A	A	A	A	H	H	A	H	A	A	H	H	A	H	H	H	H	A	H	A	H	A	H	A	A	A	A	A	H	A	H	H	H	A	H	A	H	H
Squ20F	Sequ0836TUF	A	H	A	A	A	A	H	A	H	H	A	A	A	A	H	H	A	H	A	A	H	H	A	H	H	H	H	A	H	A	H	A	H	A	A	A	A	A	H	A	H	H	H	A	H	A	H	H
Squ20F	Sequ0017BAC	A	H	A	A	A	A	H	A	H	H	A	A	A	A	H	H	A	H	A	A	H	H	A	H	H	H	H	A	H	A	H	A	H	A	A	A	A	A	H	A	H	H	H	A	H	A	H	H
Squ20F	Sequ0730TUF	A	H	A	A	A	A	H	A	H	H	A	A	A	A	H	H	A	H	A	A	H	H	A	H	H	H	H	A	H	A	H	A	H	A	A	A	A	A	H	A	H	H	H	A	H	A	H	H
Squ20F	Sequ0808TUF	A	H	H	A	A	A	H	A	H	H	A	A	A	A	H	H	A	H	A	A	H	H	A	H	H	A	H	H	H	A	H	A	H	A	A	A	A	A	H	A	H	H	H	A	H	A	H	H
Squ20F	Sequ1161BAC	A	H	H	A	A	A	H	A	H	H	A	A	A	A	H	H	A	H	A	A	A	H	A	H	H	A	A	H	H	A	H	H	H	A	A	A	A	A	H	A	H	H	H	A	H	A	H	H
Squ20F	Sequ0288TUF	A	H	H	A	A	A	H	A	H	H	A	A	A	A	H	H	A	H	A	A	A	H	A	H	H	A	A	H	H	A	H	H	H	A	A	A	A	A	H	A	H	H	H	A	H	A	H	H
Squ20F	Sequ0234TUF	H	A	H	A	A	A	H	A	H	H	H	A	A	H	A	H	A	H	H	H	A	H	H	H	H	A	A	H	H	H	H	H	H	A	A	A	A	A	A	A	H	A	H	H	H	A	H	A
Squ20F	Sequ1121BAC	H	A	H	A	A	A	H	A	H	H	H	A	A	H	A	H	A	H	H	H	A	H	H	H	H	A	A	H	H	H	H	H	H	A	A	A	A	A	A	A	H	A	H	H	H	A	H	A
Squ20F	Sequ1702BAC	H	A	H	A	A	A	H	A	A	H	H	A	A	H	A	H	A	H	H	H	A	H	H	H	H	A	A	H	H	H	H	H	H	A	A	H	A	H	A	A	A	A	A	H	A	A	A	A
Squ20F	Sequ0636BAC	H	A	H	A	A	A	H	A	A	H	H	A	A	H	A	H	A	H	H	H	A	H	H	H	H	A	A	H	H	H	H	H	H	A	A	H	A	H	A	A	A	A	A	H	A	A	A	A
[truncated: 45 more columns]

## Sheet: family B male geno
Family B male genotype		progeny
linkage group	marker name	1	2	3	4	5	6	7	8	9	10	11	12	13	14	15	16	17	18	19	20	21	22	23	24	25	26	27	28	29	30	31	32	33	34	35	36	37	38	39	40	41	42	43	44	45	46	47	48
Squ2M	Sequ1771BAC	H	B	H	B	H	B	H	B	H	B	H	B	H	B	B	B	B	B	B	H	B	B	H	B	B	B	B	H	H	B	H	B	B	B	H	H	B	B	B	B	B	H	H	H	H	H	B	H
Squ2M	Sequ1797BAC	H	B	H	B	H	B	H	B	H	B	H	B	H	B	B	B	B	B	B	H	B	B	H	B	B	B	B	H	H	B	H	B	B	B	H	H	B	B	B	B	B	H	H	H	H	H	B	H
Squ2M	Sequ0232TUF	B	B	B	B	H	B	H	B	H	B	H	B	H	B	B	B	B	B	B	H	B	H	H	B	B	B	B	H	H	B	H	B	B	B	H	H	H	B	B	B	B	B	H	H	B	H	B	B
Squ2M	Sequ2698BAC	B	B	B	B	H	B	H	B	H	B	H	B	H	B	B	B	B	B	B	H	B	H	H	B	B	B	B	H	H	B	H	B	B	B	H	H	H	B	B	B	B	B	H	H	B	H	B	B
Squ2M	Sequ1334BAC	B	B	B	B	H	B	H	B	H	B	H	B	H	B	B	B	B	B	B	H	B	H	H	B	B	B	B	H	H	B	H	B	B	B	H	H	H	B	B	B	B	B	H	H	B	H	B	B
Squ2M	Sequ0688BAC	B	B	B	B	H	B	H	B	H	B	H	B	H	B	B	B	B	B	B	H	B	H	H	B	B	H	B	H	H	B	H	B	B	B	H	H	H	B	B	H	B	B	H	H	B	H	B	B
Squ2M	Sequ2080BAC	B	B	B	B	H	B	H	B	H	B	H	B	H	B	B	B	B	B	B	H	B	H	H	B	B	H	B	H	H	B	H	B	B	B	H	H	H	B	B	H	B	B	H	H	B	H	B	B
Squ2M	Sequ1665BAC	B	B	B	B	H	B	H	B	H	B	H	B	H	B	B	B	B	B	B	H	B	H	H	B	B	H	B	H	H	B	H	B	B	B	H	H	H	B	B	H	B	B	H	H	B	H	B	B
Squ2M	Sequ0941TUF	B	B	B	B	H	B	H	B	H	B	H	B	H	B	B	B	B	B	H	H	B	H	H	B	B	H	B	H	H	B	H	B	B	B	H	H	H	B	B	H	B	B	H	H	B	H	B	B
Squ2M	Sequ0056BAC	B	B	B	B	H	B	H	B	H	B	H	B	H	B	B	B	B	B	H	H	B	H	H	B	B	H	B	H	H	B	H	B	B	B	H	H	H	B	B	H	B	B	H	H	B	H	B	B
Squ2M	Sequ0889TUF	B	B	B	B	H	B	H	B	H	B	H	B	H	B	B	B	B	B	H	H	B	H	H	B	B	H	B	H	H	B	H	B	B	B	H	H	H	B	B	H	B	B	H	H	B	H	B	B
Squ2M	Sequ0020TUF	B	B	B	B	H	B	H	B	H	B	H	B	H	B	B	B	B	B	H	H	B	H	H	B	B	H	B	H	H	B	H	B	B	B	H	H	H	B	B	H	B	B	H	H	B	H	B	B
Squ2M	Sequ2216BAC	B	B	B	B	H	B	H	B	H	B	H	B	H	B	B	B	B	B	H	H	B	H	H	B	B	H	B	H	H	B	H	B	B	B	H	H	H	B	B	H	B	B	H	H	B	H	H	B
Squ2M	Sequ0603TUF	B	B	B	B	B	B	H	B	H	H	H	B	H	B	B	B	B	B	H	H	B	H	H	B	B	H	B	H	H	B	H	B	B	B	H	H	H	B	B	H	B	B	H	H	B	H	H	B
Squ2M	Sequ1776BAC	B	B	B	B	B	B	H	B	H	H	H	B	H	B	B	B	B	B	H	H	B	H	H	B	B	H	B	H	H	B	H	B	B	B	H	H	H	B	B	H	B	B	H	H	B	H	H	B
Squ2M	Sequ0832TUF	B	B	B	B	B	B	H	B	H	H	H	B	H	B	B	B	B	B	H	H	B	H	H	B	B	H	B	H	H	-	H	B	B	B	H	H	H	B	B	H	B	B	H	H	B	H	H	B
Squ2M	Sequ0648TUF	B	B	B	B	B	B	H	B	H	H	H	B	H	B	B	B	B	B	H	H	B	H	H	B	B	H	B	H	H	B	H	B	B	B	H	H	H	B	B	H	B	B	H	H	B	H	H	B
Squ2M	Sequ3121BAC	B	B	B	B	B	B	H	B	H	H	H	B	H	B	B	B	B	B	H	H	B	H	H	B	B	H	B	H	H	B	H	B	B	B	H	H	H	B	B	H	B	B	H	H	B	H	H	B
Squ2M	Sequ0174TUF	B	B	B	B	B	B	H	B	H	H	H	B	H	B	B	B	B	B	H	H	B	H	H	B	B	H	B	H	H	B	H	B	B	B	H	H	H	B	B	H	B	B	H	H	B	H	H	B
Squ2M	Sequ0171BAC	B	B	B	B	B	B	H	B	H	H	H	B	H	B	B	B	B	B	H	H	B	H	H	B	B	H	B	H	H	B	H	B	B	B	H	H	H	B	B	H	B	B	H	H	B	H	H	B
Squ2M	Sequ0172TUF	B	B	B	B	B	B	H	B	H	H	H	B	H	B	B	B	B	B	H	H	B	H	H	B	B	H	B	H	H	B	H	B	B	B	H	H	H	B	B	H	B	B	H	H	B	H	H	B
Squ2M	Sequ0672TUF	B	B	B	B	B	B	H	B	H	H	H	B	H	B	B	B	B	B	H	H	B	H	H	B	B	H	B	H	H	B	H	B	B	B	H	H	H	B	B	H	B	B	H	H	B	H	H	B
Squ2M	Sequ0125TUF	B	B	B	B	B	B	H	B	H	H	H	B	H	B	B	B	B	B	H	H	B	H	H	B	B	H	B	H	H	B	H	B	B	B	H	H	H	B	B	H	B	B	H	H	B	H	H	B
Squ2M	Sequ0979BAC	B	B	B	B	B	B	H	B	H	H	H	B	H	B	B	B	B	B	H	H	B	H	H	B	B	H	B	H	H	B	H	B	B	B	H	H	H	B	B	H	B	B	H	H	B	H	H	B
Squ2M	Sequ0788TUF	B	B	B	B	B	B	H	B	H	H	H	B	H	B	B	B	B	B	H	H	B	H	H	B	B	H	B	H	H	B	H	B	B	B	H	H	H	B	B	H	B	B	H	H	B	H	H	B
Squ2M	Sequ0549TUF	B	B	B	B	B	B	H	B	H	H	H	B	H	B	B	B	B	B	H	H	B	H	H	B	B	H	B	H	H	B	H	B	B	B	H	H	H	B	B	H	B	B	H	H	B	H	H	B
Squ2M	Sequ1749BAC	B	B	B	B	B	B	H	B	H	H	H	B	H	B	B	B	B	B	H	H	B	H	H	B	B	H	B	H	H	B	H	B	B	B	H	H	H	B	B	H	B	B	H	H	B	H	H	B
Squ2M	Sequ0828TUF	B	B	B	B	B	B	H	B	H	H	H	B	H	B	B	B	B	B	H	H	B	H	H	B	B	H	B	H	H	B	H	B	B	B	H	H	H	B	B	H	B	B	H	H	B	H	H	B
Squ2M	Sequ0827TUF	B	B	B	B	B	B	H	B	H	H	H	B	H	B	B	B	B	B	H	H	B	H	H	B	B	H	B	H	H	B	H	B	B	B	H	H	H	B	B	H	B	B	H	H	B	H	H	B
Squ8M	Sequ0074TUF	B	H	H	B	H	H	B	B	H	B	H	H	H	H	B	H	H	H	B	H	B	H	H	B	B	B	H	H	B	B	H	H	B	H	H	B	B	B	H	B	B	B	H	H	B	H	H	B
Squ8M	Sequ0409TUF	H	H	H	B	H	H	B	B	H	B	H	H	H	H	B	H	H	H	B	H	B	H	H	B	H	B	H	H	B	B	H	H	B	H	H	B	B	B	H	B	B	B	B	H	B	H	H	B
Squ8M	Sequ0906TUF	H	H	H	B	H	H	B	B	H	B	H	H	H	H	B	H	H	H	B	H	B	H	H	B	H	B	H	H	B	B	H	H	B	H	H	B	B	B	H	B	B	B	B	H	B	H	H	B
Squ8M	Sequ0431TUF	H	H	H	B	H	H	B	B	H	B	H	H	H	H	B	H	H	H	B	H	B	H	H	B	H	B	H	H	B	B	H	H	B	H	H	B	B	B	H	B	B	B	B	H	B	H	H	B
Squ8M	Sequ0851TUF	H	H	H	B	H	H	B	B	H	B	H	H	H	H	B	H	H	H	B	H	B	H	H	B	H	B	H	H	B	B	H	H	B	H	H	B	B	B	H	B	B	B	B	-	B	H	H	B
Squ8M	Sequ0160TUF	H	H	H	B	H	H	B	B	H	B	H	H	H	H	B	H	H	H	B	H	B	H	H	B	H	B	H	H	B	B	H	H	B	H	H	B	B	B	H	B	B	B	B	H	B	H	H	B
Squ8M	Sequ3175BAC	H	H	B	B	H	H	B	B	H	B	H	H	H	H	B	H	H	H	B	H	B	H	B	B	H	H	H	H	B	B	H	H	B	H	H	B	B	B	H	B	B	B	B	H	B	H	H	B
Squ8M	Sequ2078BAC	H	H	B	B	H	H	H	B	H	B	H	B	H	H	B	H	H	H	B	H	B	H	B	H	H	H	H	H	B	B	H	H	B	H	H	B	B	B	H	B	B	B	B	B	B	H	H	B
Squ8M	Sequ0873TUF	H	H	B	B	H	H	H	B	H	B	H	B	H	H	B	H	H	H	B	H	B	H	B	H	H	H	H	H	B	B	H	H	B	H	B	B	B	B	H	B	B	B	B	B	B	H	B	B
Squ8M	Sequ1769BAC	H	H	B	B	H	H	H	B	H	B	H	B	H	B	B	H	B	H	B	H	B	H	B	H	H	H	H	H	B	B	H	H	B	H	B	H	B	B	H	B	B	B	B	B	B	H	B	B
Squ8M	Sequ0670BAC	H	H	B	B	H	H	H	B	H	B	H	B	H	B	B	H	B	H	B	H	B	H	B	H	H	H	H	H	B	B	H	H	B	H	B	H	B	B	H	B	B	B	B	B	B	H	B	B
Squ8M	Sequ0503TUF	H	H	B	H	H	H	H	B	H	B	H	B	H	B	B	H	B	H	B	H	B	H	B	H	H	H	H	H	B	B	H	H	B	H	B	H	H	B	H	B	H	B	B	B	B	H	B	B
Squ8M	Sequ2536BAC	H	H	B	H	H	H	H	H	H	B	H	B	H	B	B	H	B	H	B	H	B	H	B	H	H	H	H	H	B	B	H	H	B	H	B	H	H	B	H	B	H	B	B	B	B	H	B	B
Squ8M	Sequ0101TUF	H	H	B	H	H	H	H	H	H	B	H	B	H	B	B	H	B	H	B	H	B	H	B	H	H	H	H	H	B	B	H	H	B	H	B	H	H	B	H	B	H	B	B	B	B	H	B	B
Squ8M	Sequ2198BAC	H	H	B	H	H	H	H	H	H	B	H	B	H	B	B	H	B	H	B	H	B	H	B	H	H	H	H	H	B	B	H	H	B	H	B	H	H	B	H	B	H	H	B	B	B	H	B	B
Squ8M	Sequ0985TUF	H	H	B	H	H	H	H	H	H	B	H	B	H	B	H	H	B	H	B	H	B	H	B	H	H	H	H	H	B	B	H	B	B	H	B	H	B	B	H	B	H	H	B	B	B	H	B	B
Squ8M	Sequ2218BAC	H	H	B	H	H	H	H	H	H	B	H	B	H	B	H	H	B	H	B	H	B	H	B	H	H	H	H	H	B	B	H	B	B	H	B	H	B	B	H	B	H	H	B	B	B	H	B	B
Squ8M	Sequ2385BAC	H	H	B	H	H	H	H	H	H	B	H	B	H	B	H	-	B	H	B	H	B	H	B	H	H	H	H	H	B	B	H	B	B	H	B	H	B	B	H	B	H	H	B	B	B	H	B	B
Squ8M	Sequ1013TUF	H	H	B	H	H	H	H	H	H	B	H	B	H	B	H	H	B	H	B	H	B	H	B	H	H	H	H	H	B	B	H	B	B	H	B	H	B	B	H	B	H	H	B	B	B	H	B	B
Squ8M	Sequ1039TUF	H	H	B	H	H	H	H	H	H	B	H	B	H	B	H	H	B	H	B	H	B	H	B	H	H	H	H	H	B	B	H	B	B	H	B	H	B	B	H	B	H	H	B	B	B	H	B	B
Squ8M	Sequ0883TUF	H	H	B	H	H	H	H	H	H	B	H	B	H	B	H	H	B	H	B	H	B	H	B	H	H	H	H	H	B	B	H	B	B	H	B	H	B	B	H	B	H	H	B	B	B	H	B	B
Squ8M	Sequ0801TUF	H	H	B	H	H	H	H	H	H	B	H	B	H	B	H	H	B	H	B	H	B	H	B	H	H	H	H	H	B	B	H	B	B	H	B	H	B	B	H	B	H	H	B	B	B	H	B	B
Squ8M	Sequ0650BAC	H	H	B	H	H	H	H	H	H	B	H	B	H	B	H	H	B	H	B	H	B	H	B	H	H	H	H	H	B	B	H	B	B	H	B	H	B	B	H	B	H	H	B	B	B	H	B	B
Squ20M	Sequ1100BAC	H	B	H	H	H	H	H	B	B	H	B	H	B	H	H	B	H	H	H	B	B	H	H	B	H	B	H	B	H	H	H	H	B	H	B	B	H	H	H	B	B	H	H	H	H	H	H	H
Squ20M	Sequ0439TUF	H	B	H	H	H	H	H	H	B	H	B	B	B	H	H	B	H	H	H	B	B	H	H	B	H	B	H	B	H	H	H	B	B	H	B	B	H	H	H	B	B	H	H	H	H	H	H	H
Squ20M	Sequ3071BAC	H	B	H	H	H	H	H	H	B	H	B	B	B	H	H	B	H	H	H	B	B	H	H	B	H	B	H	B	H	H	H	B	H	H	B	B	H	H	H	B	B	H	H	H	H	H	H	H
Squ20M	Sequ0938TUF	H	B	H	H	H	H	H	H	B	H	B	B	H	H	H	B	H	H	H	B	B	H	H	B	H	B	H	B	H	H	H	B	H	H	B	B	H	H	H	B	B	H	H	H	H	H	H	H
Squ20M	Sequ2569BAC	H	B	H	H	H	H	H	H	B	H	B	B	H	H	H	B	H	H	H	B	B	H	H	B	H	B	H	B	H	H	H	B	H	H	B	B	H	H	H	B	B	B	H	H	H	H	H	H
Squ20M	Sequ2645BAC	H	B	B	B	H	H	B	H	B	H	B	B	H	H	H	B	H	H	H	B	B	H	H	B	H	B	H	B	H	H	H	B	H	H	B	B	H	H	H	B	B	B	H	H	H	H	H	H
Squ20M	Sequ0537TUF	H	B	B	B	H	H	B	H	H	H	H	B	H	B	H	B	H	H	H	B	B	H	H	B	H	B	H	H	H	B	H	B	H	H	H	B	H	B	H	H	H	B	B	H	H	H	H	B
Squ20M	Sequ0596BAC	H	B	B	B	H	H	B	H	H	H	H	B	H	B	H	B	B	H	H	B	B	H	H	B	H	H	H	H	H	B	H	B	H	H	H	H	H	B	H	H	H	B	B	H	H	H	H	B
Squ20M	Seuq0829TUF	H	B	B	B	H	H	B	H	H	H	H	B	H	B	H	B	B	H	H	B	B	H	H	B	H	H	H	H	H	B	H	B	H	H	H	H	H	B	H	H	H	B	B	H	H	H	H	B
Squ20M	Sequ0836TUF	H	B	B	B	H	H	B	H	H	H	H	B	H	B	H	B	B	H	H	B	B	H	H	B	H	H	H	H	H	B	H	B	H	H	H	H	H	B	H	H	H	B	B	H	H	H	H	B
Squ20M	Sequ1989BAC	H	B	B	B	H	H	B	H	H	H	H	B	H	B	H	B	B	H	H	B	B	H	H	B	H	H	H	H	H	B	H	B	H	H	H	H	H	B	H	H	H	B	B	H	H	H	H	B
Squ20M	Sequ0017BAC	H	B	B	B	H	H	B	H	H	H	H	B	H	B	H	B	B	H	H	B	B	H	H	B	H	H	H	H	H	B	H	B	H	B	H	H	H	B	H	H	H	B	B	H	H	H	B	B
Squ20M	Sequ0730TUF	H	B	B	B	H	H	B	H	H	H	H	B	H	B	H	B	B	H	H	B	B	H	H	B	H	H	H	H	H	B	H	B	H	B	H	H	H	B	H	H	H	B	B	H	H	H	B	B
Squ20M	Sequ0808TUF	H	B	B	B	H	H	B	H	H	H	H	B	H	B	H	B	B	H	H	B	B	H	H	B	H	H	H	H	H	B	H	B	H	B	H	H	H	B	H	H	H	B	B	H	H	H	B	B
Squ20M	Sequ1121BAC	H	B	B	B	H	H	B	H	H	H	H	B	H	B	H	B	B	H	H	B	B	H	H	B	H	H	H	H	H	B	H	B	H	B	H	H	H	B	H	H	H	B	B	H	H	H	B	B
Squ20M	Sequ1834BAC	H	B	B	B	H	H	B	H	H	H	H	B	H	B	H	B	B	H	H	B	B	H	H	B	H	H	H	H	H	B	H	B	H	B	H	H	H	B	H	H	H	B	B	H	H	H	B	B
Squ20M	Sequ0288TUF	H	B	B	B	H	H	B	H	H	H	H	B	H	B	H	B	B	H	H	B	B	H	H	B	H	H	H	H	H	B	H	B	H	B	H	H	H	B	H	H	H	B	B	H	H	H	B	B
Squ20M	Seuqu0234TUF	H	B	B	B	H	H	B	H	H	H	H	B	H	B	H	B	B	H	H	B	B	H	H	B	H	H	H	H	H	B	H	B	H	B	H	H	H	B	H	H	H	B	B	H	H	H	B	B
Squ20M	Sequ1702BAC	H	B	B	B	H	H	B	H	H	H	H	B	H	B	H	B	B	H	H	B	B	H	H	B	H	H	H	H	H	B	H	B	H	B	H	H	H	B	H	H	H	B	B	H	H	H	B	B
[truncated: 45 more columns]

## Sheet: family A phenotype
progeny Nr.	total length	body length	body weight	surface area	hadamushi	hadamushiZ
1	18.1	16.5	63.5	99.0675	24	-2.23
2	17.6	16.3	59.7	93.3737	27	-2.1
3	18.4	17	66	102.569	29	-2.01
4	17.6	16.1	57.8	93.3737	36	-1.69
5	18.7	17	69.7	106.135	39	-1.55
6	16.8	15.3	49.6	84.6321	39	-1.55
7	19.5	18	81.7	115.958	41	-1.46
8	18.3	16.7	65.3	101.395	41	-1.46
9	17.2	15.9	58	88.9463	43	-1.37
10	17.3	16	58.8	90.0426	44	-1.32
11	19.8	17.7	79.8	119.76	45	-1.28
12	19.1	17.3	72.8	110.989	45	-1.28
13	19.4	17.4	77.4	114.705	45	-1.28
14	18.7	17.3	76	106.135	47	-1.18
15	17.1	15.5	55.3	87.8572	48	-1.14
16	19.2	17.7	78.9	112.22	49	-1.09
17	18.2	16.8	63.7	100.228	49	-1.09
18	17.2	15.6	52.6	88.9463	49	-1.09
19	18.2	17	65.9	100.228	51	-1
20	20.2	18.5	86.7	124.929	52	-0.96
21	19.4	17.3	72.3	114.705	52	-0.96
22	19.7	17.8	78.9	118.485	52	-0.96
23	18.4	16.7	66.2	102.569	55	-0.82
24	18.7	16.7	68.5	106.135	55	-0.82
25	19.1	17.6	76.4	110.989	56	-0.77
26	17.7	16.3	62.9	94.4983	57	-0.73
27	18.6	17	68.3	104.939	58	-0.68
28	18.3	16.9	66.4	101.395	58	-0.68
29	19.7	17.9	83.2	118.485	59	-0.64
30	19.1	17.5	75.8	110.989	60	-0.59
31	17.6	16.1	56.9	93.3737	62	-0.5
32	18.4	16.8	67.6	102.569	62	-0.5
33	19.3	17.3	72.9	113.459	63	-0.45
34	19.3	17.8	73.9	113.459	63	-0.45
35	19.9	18.2	92.2	121.041	65	-0.36
36	18.4	16.7	64.6	102.569	66	-0.32
37	19.8	18.2	79.3	119.76	66	-0.32
38	18.9	17.4	75.6	108.548	66	-0.32
39	19.8	17.9	88.5	119.76	67	-0.27
40	18.3	16.4	69.1	101.395	69	-0.18
41	17.8	16.2	57.6	95.63	70	-0.13
42	18.2	16.7	65.8	100.228	70	-0.13
43	17.3	16	56.8	90.0426	70	-0.13
44	18	16.7	63.5	97.9146	70	-0.13
45	18.8	17.2	71.4	107.338	71	-0.09
46	18.8	17.4	76.2	107.338	75	0.1
47	18.3	16.6	64.7	101.395	76	0.14
48	18.2	16.9	68.8	100.228	76	0.14
49	19.3	17.6	77	113.459	77	0.19
50	17.3	15.7	54.5	90.0426	78	0.23
51	18.8	17	71.7	107.338	79	0.28
52	17.2	15.9	57.5	88.9463	80	0.32
53	17.7	16.5	60.6	94.4983	81	0.37
54	19.2	17.3	71.2	112.22	82	0.42
55	17.8	16	60.6	95.63	82	0.42
56	17.7	16.5	63.1	94.4983	83	0.46
57	19	17.7	78.1	109.765	84	0.51
58	17.6	16.2	60.6	93.3737	84	0.51
59	18.7	17.3	71.2	106.135	85	0.55
60	18.3	16.7	72.1	101.395	85	0.55
61	18.6	17.1	69.3	104.939	86	0.6
62	18.5	17.1	69.1	103.751	87	0.64
63	16.7	15.3	50.2	83.5712	87	0.64
64	18.9	17.3	74	108.548	87	0.64
65	19	17.5	74.1	109.765	87	0.64
66	17.3	15.7	53.8	90.0426	88	0.69
67	17.7	16.3	60	94.4983	88	0.69
68	18.8	17.1	72.7	107.338	89	0.74
69	19	17.3	71.4	109.765	90	0.78
70	18.1	16.4	61.7	99.0675	90	0.78
71	18.1	16.4	62.7	99.0675	92	0.87
72	18.7	17	67.3	106.135	93	0.92
73	18.7	17.1	71.4	106.135	94	0.96
74	17.1	15.7	56.4	87.8572	95	1.01
75	17.1	16.4	62	87.8572	95	1.01
76	18.2	16.8	59.6	100.228	97	1.1
77	18.8	17.4	74.3	107.338	97	1.1
78	18	16.2	61	97.9146	97	1.1
79	19	17.5	77.9	109.765	98	1.15
80	16.8	15.5	65.3	84.6321	101	1.28
81	20.5	18.3	85.4	128.882	102	1.33
82	17	15.5	55.4	86.7751	103	1.37
83	18.8	17.2	73.7	107.338	105	1.47
84	19	16.9	69.3	109.765	106	1.51
85	18.9	17.5	83	108.548	107	1.56
86	19.3	17.7	80.1	113.459	107	1.56
87	18.6	17	67.3	104.939	110	1.69
88	20	18.5	87.9	122.33	112	1.79
89	19.7	17.6	76.7	118.485	126	2.43
90	18.1	16.5	68.4	99.0675	129	2.56

## Sheet: family B phenotype
progeny Nr.	total length	body length	body weight	surface area	hadamushi	hadamushiZ
1	17.5	16.1	55.2	92.2563	49	-1.87
2	17.2	15.6	52.2	88.9463	50	-1.825
3	16.8	15.4	51.1	84.6321	50	-1.825
4	17.3	16	54.6	90.0426	51	-1.779
5	17.6	16.2	61.1	93.3737	51	-1.779
6	17.3	16	56.6	90.0426	55	-1.599
7	18.6	16.7	62.9	104.939	56	-1.554
8	18.3	16.5	65.1	101.395	62	-1.283
9	17.5	16	39.4	92.2563	64	-1.193
10	16	14.6	40.7	76.3417	65	-1.148
11	17.2	16	54.9	88.9463	65	-1.148
12	18.1	16.7	64.4	99.0675	65	-1.148
13	17.9	16.5	55.8	96.7687	66	-1.103
14	19.4	17.9	76	114.705	66	-1.103
15	17.8	16.2	57.9	95.63	66	-1.103
16	17	15.6	50.7	86.7751	67	-1.058
17	18.1	16.7	61.8	99.0675	68	-1.012
18	18.3	17	68.6	101.395	70	-0.922
19	18.8	17.4	70.5	107.338	70	-0.922
20	16.8	15.2	47.1	84.6321	70	-0.922
21	17.7	16.3	55.9	94.4983	71	-0.877
22	15.1	14.9	34.6	67.5515	72	-0.832
23	18.3	16.5	61	101.395	72	-0.832
24	15.8	14.8	42.3	74.3394	73	-0.787
25	17.8	16.3	59	95.63	73	-0.787
26	17.8	16.1	55.5	95.63	74	-0.742
27	18.4	17	64.4	102.569	75	-0.697
28	17.8	16.3	61.1	95.63	75	-0.697
29	17.5	16.3	55.9	92.2563	76	-0.652
30	16.4	15.2	43.3	80.4306	76	-0.652
31	17.1	15.8	52.4	87.8572	76	-0.652
32	17.7	16.4	61.6	94.4983	77	-0.606
33	18.7	17.2	67.9	106.135	79	-0.516
34	18.4	17	67.3	102.569	80	-0.471
35	17.9	16.6	63.2	96.7687	81	-0.426
36	17.4	16.2	57.8	91.1459	81	-0.426
37	18.3	16.6	61.2	101.395	81	-0.426
38	18	16.7	64	97.9146	82	-0.381
39	19	16.9	66.5	109.765	82	-0.381
40	16.4	15.1	46	80.4306	85	-0.246
41	18.6	16.8	67.5	104.939	85	-0.246
42	17.3	15.6	54.4	90.0426	85	-0.246
43	18.3	16.5	61.7	101.395	86	-0.2
44	16.4	14.9	42.6	80.4306	86	-0.2
45	16.3	15	44.8	79.3979	87	-0.155
46	18.3	17	55.7	101.395	92	0.07
47	18.8	17.3	67	107.338	92	0.07
48	17.7	16.4	59.7	94.4983	93	0.115
49	17.7	16.1	57.2	94.4983	93	0.115
50	18.6	17.3	66.4	104.939	94	0.16
51	18.7	17.2	71.5	106.135	94	0.16
52	17.6	15.8	51	93.3737	94	0.16
53	18.7	16.6	62.9	106.135	95	0.206
54	17.3	15.7	54.8	90.0426	95	0.206
55	18.3	16.4	55.7	101.395	95	0.206
56	16.5	16.9	44	81.4704	95	0.206
57	18.6	16.8	65.8	104.939	95	0.206
58	18	16.2	60	97.9146	96	0.251
59	19.3	17.6	76	113.459	97	0.296
60	17.7	16.4	59	94.4983	98	0.341
61	18.5	16.9	65.6	103.751	99	0.386
62	17.8	16.3	60.9	95.63	99	0.386
63	17.7	16	60.4	94.4983	101	0.476
64	19.6	17.9	79.5	117.218	101	0.476
65	18.7	17.3	71.8	106.135	102	0.521
66	18	16.4	61.9	97.9146	103	0.566
67	19.1	17.1	71.1	110.989	103	0.566
68	18.2	16.7	63.6	100.228	106	0.702
69	19.3	17.5	72.9	113.459	107	0.747
70	19.6	17.8	79	117.218	107	0.747
71	18.2	16.4	61.2	100.228	109	0.837
72	18.3	16.5	64.4	101.395	110	0.882
73	18.6	16.9	66.2	104.939	110	0.882
74	18.3	16.7	64.4	101.395	111	0.927
75	18.6	16.8	67.4	104.939	111	0.927
76	17.2	16	57	88.9463	114	1.063
77	17.4	15.9	55.1	91.1459	114	1.063
78	17.3	16	53.7	90.0426	116	1.153
79	18.2	16.3	62.8	100.228	116	1.153
80	18.4	17	63.1	102.569	118	1.243
81	18.7	17	66.2	106.135	119	1.288
82	18.4	16.6	64.6	102.569	119	1.288
83	17.8	16.3	59	95.63	120	1.333
84	18.3	17	68	101.395	121	1.379
85	19.8	18.2	82.9	119.76	122	1.424
86	19.3	17.8	78.9	113.459	122	1.424
87	18.1	16.8	68.9	99.0675	123	1.469
88	17.4	16	54.8	91.1459	124	1.514
89	18	16.5	62.2	97.9146	126	1.604
90	18.5	17.1	66.8	103.751	130	1.785
91	18.5	17.1	68.4	103.751	136	2.055
92	18.5	17.1	68.1	103.751	136	2.055
93	19.1	17.6	76.6	110.989	149	2.642
